# Supplementary material for: Base-promoted anaerobic intramolecular cyclization synthesis of 4,5-disubstituted-1,2,3-thiadiazoles
Source: Royal Society of Chemistry journal article supplement (doi:10.1039/d2qo00351a), 2022-01-01

## Supporting Information

*for*

### **Base-promoted anaerobic intramolecular cyclization synthesis of 4,5- disubstituted 1,2,3-thiadiazoles**

Cong Dong<sup>a</sup>, Shaoyu Mai<sup>a</sup>, Shuai Wang<sup>a</sup>, Xin Li<sup>a</sup> and Qiuling Song<sup>a,b,c,d \*</sup>

---

<sup>a</sup> *Institute of Next Generation Matter Transformation, College of Material Sciences Engineering at Huaqiao University, 668 Jimei Blvd, Xiamen, Fujian, 361021, P. R. China.*

<sup>b</sup> *State Key Laboratory of Organometallic Chemistry and Key Laboratory of Organofluorine Chemistry, Shanghai Institute of Organic Chemistry, Chinese Academy of Sciences, Shanghai 200032, P. R. China*

<sup>c</sup> *Guangdong Provincial Key Laboratory of Catalysis, Southern University of Science and Technology, Shenzhen 518055, Guangdong, P. R. China.*

<sup>d</sup> *School of Chemistry and Chemical Engineering, Henan Normal University, Xinxiang, Henan, 453007, China*

Email: [qsong@hqu.edu.cn](mailto:qsong@hqu.edu.cn)

## Table of Contents

|                                                                      |    |
|----------------------------------------------------------------------|----|
| 1. General Information -----                                         | 3  |
| 2. Experimental Section -----                                        | 4  |
| 2.1 Optimization of experiment conditions -----                      | 4  |
| 2.2 Materials and Methods -----                                      | 6  |
| 2.3 General procedure for synthesis of target product <b>2</b> ----- | 7  |
| 2.4 Gram scale synthesis -----                                       | 8  |
| 2.5 Mechanistic studies -----                                        | 8  |
| 3. Characterization data for substrate <b>1</b> and products -----   | 10 |
| 4. Crystal Structure of <b>2d</b> and <b>2j</b> -----                | 23 |
| 5. References -----                                                  | 26 |
| 6. NMR Spectra of substrate <b>1</b> and product -----               | 27 |

## 1. General Information

$^1\text{H}$  NMR,  $^{13}\text{C}$  NMR and  $^{19}\text{F}$  NMR spectra of compounds were recorded at rt in  $\text{CDCl}_3$  on 400 MHz and 500MHz instrument with tetramethylsilane (TMS) as internal standard. Data for  $^1\text{H}$  NMR are recorded as follows: chemical shift (ppm), multiplicity (s, singlet; d, doublet; t, triplet; q, quarter; m, multiplet), coupling constant (Hz), integration. Data for  $^{13}\text{C}$  NMR are reported in terms of chemical shift ( $\delta$ , ppm). Chemical shifts were reported in ppm on the scale relative to  $\text{CDCl}_3$  ( $\delta = 7.26$  for  $^1\text{H}$ -NMR,  $\delta = 77.00$  for  $^{13}\text{C}$ -NMR) or  $\text{DMSO-d}_6$  ( $\delta = 2.50$  for  $^1\text{H}$ -NMR,  $\delta = 39.60$  for  $^{13}\text{C}$ -NMR) as an internal reference. High resolution mass spectra (HRMS) were recorded on a LC-TOF spectrometer (Micromass). ESI-HRMS data were acquired using a Thermo LTQ Orbitrap XL Instrument equipped with an ESI source and controlled by Xcalibur software. Oil bath was used as heating source.

Aryl iodides, aryl bromides and propargylamine were obtained from the commercial sources or synthesized following literature procedures<sup>1</sup>. THF was dried by Na prior to use. Unless otherwise stated, all experiments were conducted in a 25 mL schlenk tube under  $\text{N}_2$  atmosphere. Other chemicals were purchased from TCI, Energy, Adamas, Meryer, Acros, and Alfa Aesar, and used as received. Reactions were monitored by TLC or GC-MS analysis. Flash column chromatography was performed over silica gel (200-300 mesh).

## 2. Experimental Section

### 2.1 Optimization of experiment conditions

Table S1. Optimization of the reaction conditions<sup>[a]</sup>

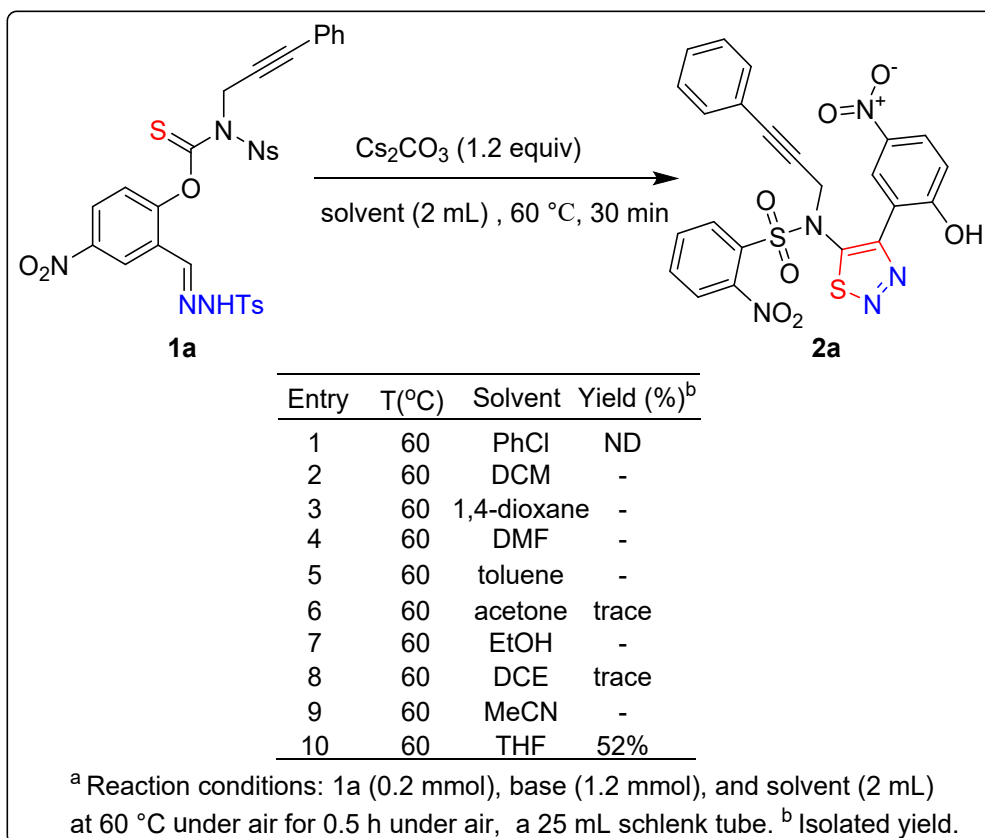

**Table S2. Optimization of the reaction conditions<sup>[a]</sup>**

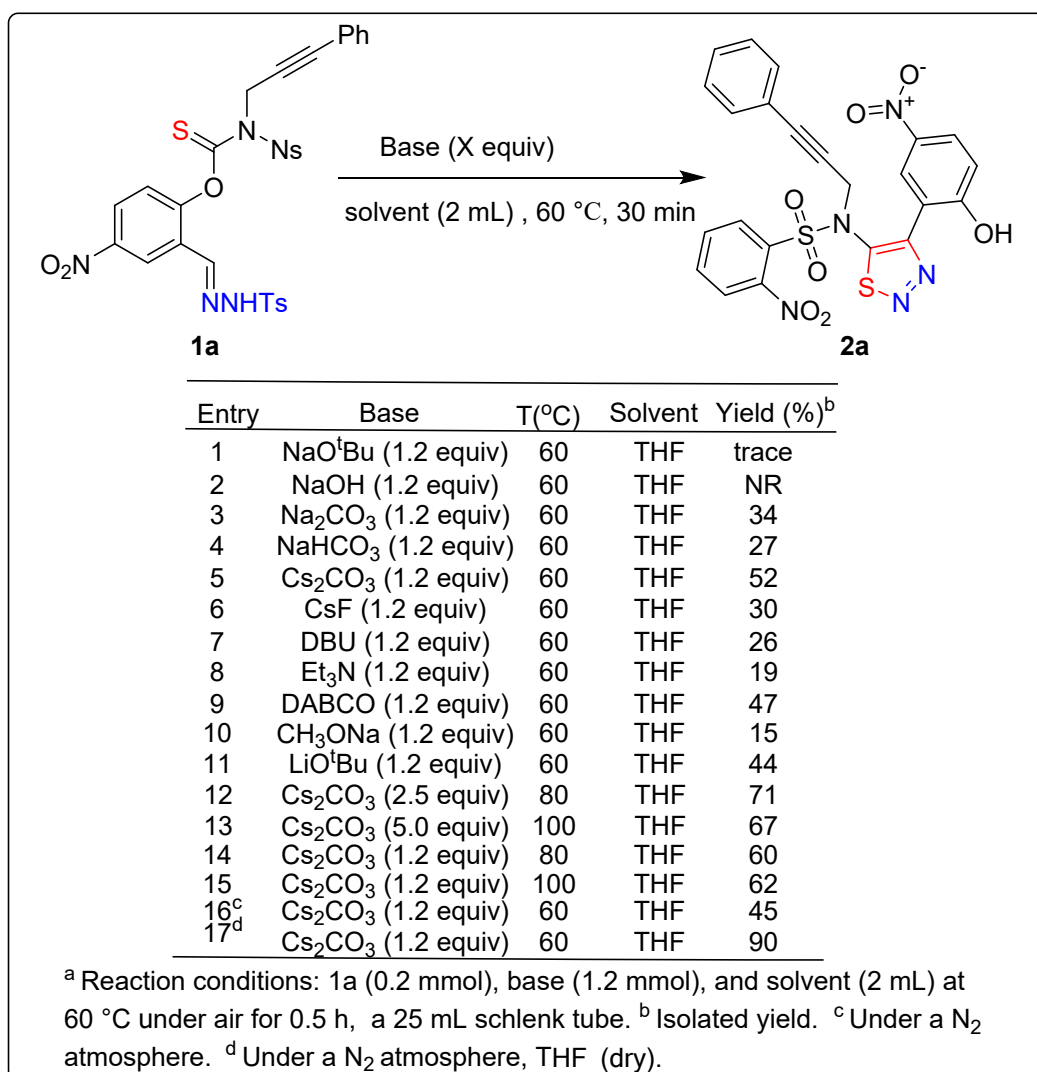

## 2.2 Materials and Methods

The *N*-tosylhydrazones were synthesized as detailed below.

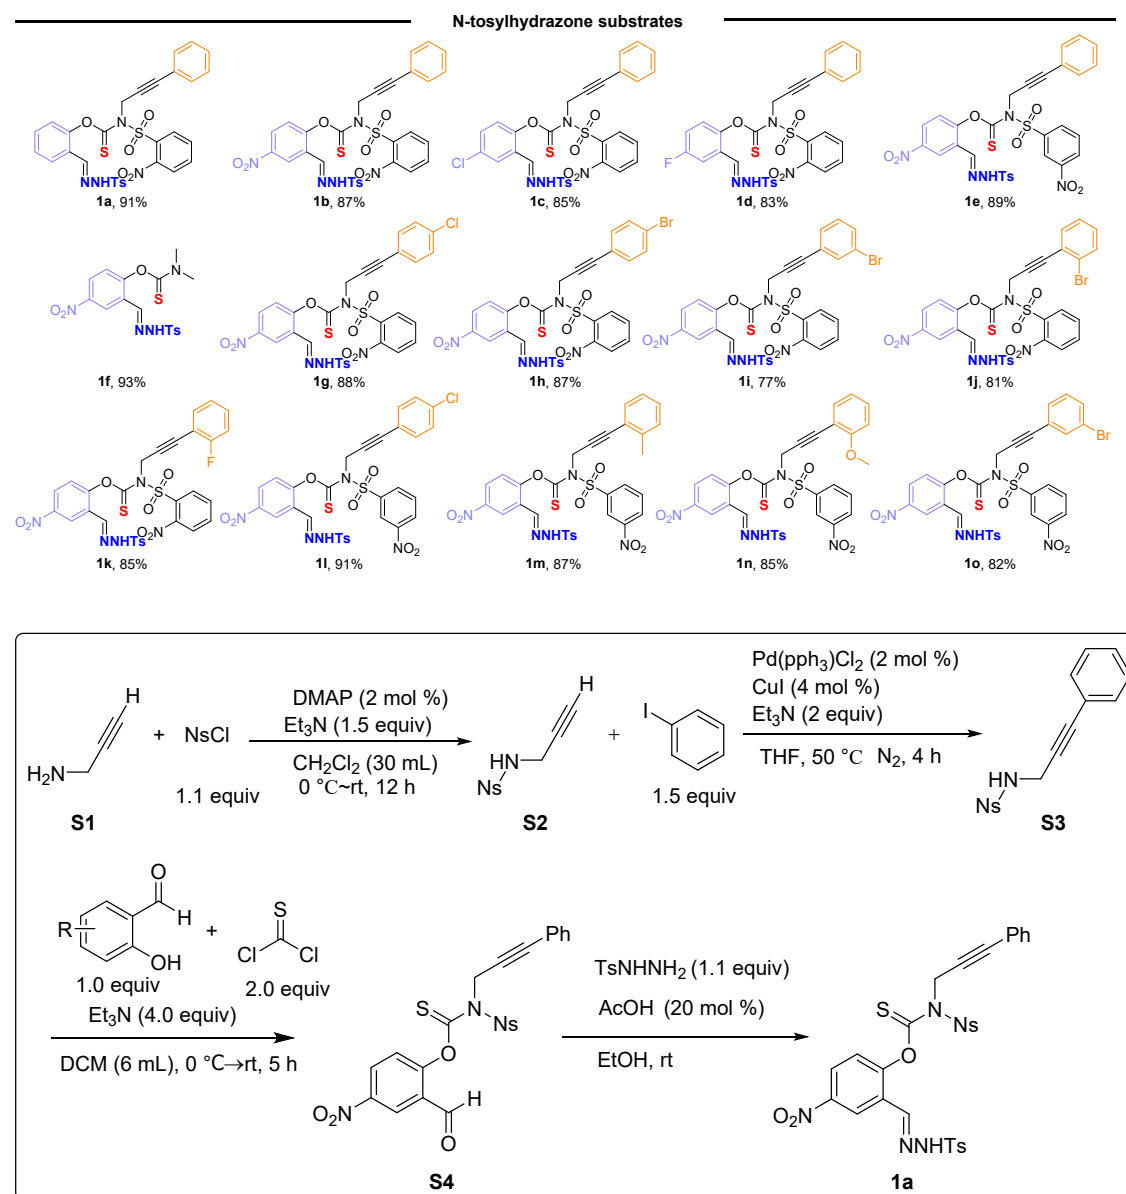

### Scheme S1. Synthetic route to *N*-tosylhydrazones 1

To a solution of the corresponding prop-2-yn-1-amine **S1** (100 mmol, 1.0 equiv) in  $\text{CH}_2\text{Cl}_2$  (100 ml) at ice bath was added triethylamine (150 mmol, 1.5 equiv), and DMAP (2 mmol, 2 mol%) successively. After 10 min, added NsCl (110 mmol, 1.1 equiv) to the reaction mixture. The mixture was stirred for 0.5 h at ice bath, then remove the ice bath and stirred at room temperature overnight. After the reaction was completed (monitoring by TLC), brine was added (30 mL) and the mixture was extracted with  $\text{CH}_2\text{Cl}_2$  ( $3 \times 30 \text{ mL}$ ). The combined organic layers were dried with  $\text{MgSO}_4$ , filtered, and evaporated in vacuo. A portion of the crude product **S2** was directly subjected for

the next step. The starting materials were synthesized according to methods reported by previous literatures<sup>1</sup>.

To a mixture of the above crude product (100 mmol, 1.0 equiv), Pd(PPh<sub>3</sub>)<sub>2</sub>Cl<sub>2</sub> (2 mmol, 2 mol%), and copper(I) iodide (4 mmol, 4 mol%), a solution of triethylamine (200 mmol, 2.0 equiv) was added followed by 50 ml THF under a N<sub>2</sub> atmosphere. The reaction mixture was stirred at room temperature for 3 h under argon atmosphere. The reaction mixture was then concentrated, and purified by column chromatography on silica gel (petroleum ether/EtOAc: 6/1, v/v) to afford the corresponding silyl alkynes **S3** (80 – 95% yields). The starting materials were synthesized according to methods reported by previous literatures<sup>2</sup>.

To a solution of the corresponding propargylamine (80 mmol, 1.0 equiv) in DCM (100 ml) at ice bath was added thiophosgene (160 mmol, 2.0 equiv). After 5 min, added triethylamine (320 mmol, 4.0 equiv) to the reaction mixture. Then added salicylaldehyde (80 mmol, 1.0 equiv) 5 min later and stirred at the ice bath for 4 h. Once the reaction was completed (monitoring by TLC), water was added (30 mL) and the mixture was extracted with CH<sub>2</sub>Cl<sub>2</sub> (3 × 30 mL). The combined organic phases were washed with 5% HCl (20 mL), 1 M NaOH (20 mL), and brine (20 mL), dried over Na<sub>2</sub>SO<sub>4</sub>, and evaporated in vacuo. The residue was purified by column chromatography (petroleum ether/EtOAc: 6/1-4/1, v/v), giving the expected product **S4** (45 – 64% yields). This experiment was synthesized according to methods reported by previous literatures<sup>3</sup>.

To a solution of aryl benzaldehyde (10 mmol, 1.0 equiv) and *p*-toluene sulfonylhydrazide (11 mmol, 1.1 equiv) in methanol, a catalytic amount of acetic acid was added. The mixture was stirred at 60 °C for 3h and the reaction was monitored by TLC. After the completion of the reaction, methanol was evaporated under reduced pressure, then added water and extracted with CH<sub>2</sub>Cl<sub>2</sub> (3 × 30 mL). The organic phases were combined and dried over anhydrous Na<sub>2</sub>SO<sub>4</sub>. The solvent was removed at reduced pressure and afforded as a white solid **1a** in 80 – 95% yields. This experiment was synthesized according to methods reported by previous literatures<sup>4</sup>.

### 2.3 General procedure for synthesis of target product 2

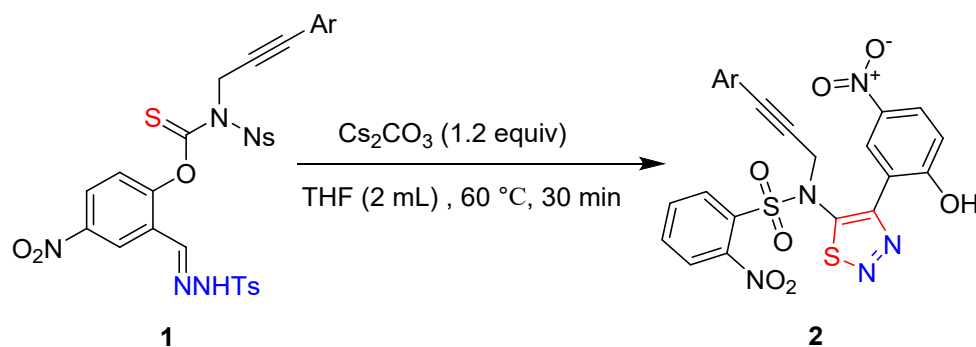

Scheme S2. General procedure for synthesis of target product 2.

Unless otherwise noted, an oven-dried 25 mL resealable Schlenk tube equipped with a magnetic stir bar was charged with *N*-tosylhydrazones **1** (0.2 mmol, 1.0 equiv), Cs<sub>2</sub>CO<sub>3</sub> (2.4 mmol, 1.2 equiv). After that, argon was pumped three times, and anhydrous THF (2 mL) was added under N<sub>2</sub> atmosphere. Then the reaction mixture was stirred at 60 °C for 0.5 h. Upon completion (monitored by TLC), the filtrate was evaporated and the residue was purified by column chromatography on silica gel (petroleum ether/EtOAc: 4/1-2/1, v/v) to afford the desired product **2**.

## 2.4 Gram scale synthesis

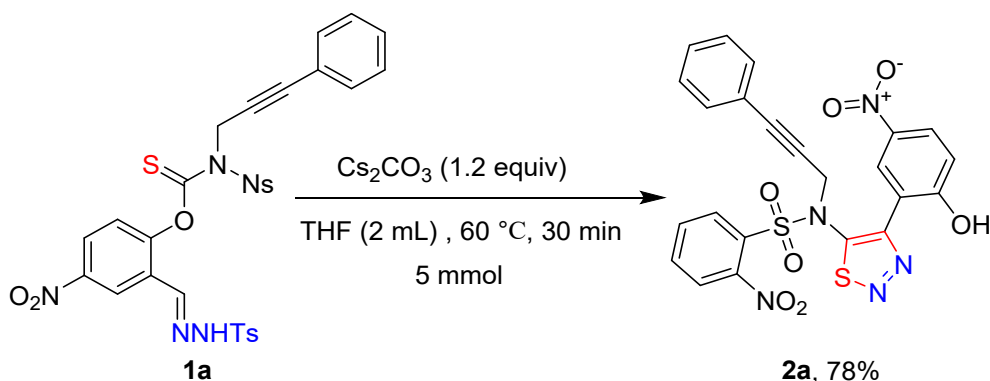

Scheme S3. Gram-scale synthesis of products **2a**.

In an oven-dried 100 mL resealable Schlenk tube equipped with a magnetic stir bar was charged with *N*-tosylhydrazones **1a** (5.0 mmol, 1.0 equiv), Cs<sub>2</sub>CO<sub>3</sub> (6.0 mmol, 1.2 equiv). After that, argon was pumped three times, and anhydrous THF (2 mL) was added under N<sub>2</sub> atmosphere. Then the reaction mixture was stirred at 60 °C for 0.5 h. Upon completion (monitored by TLC), the filtrate was evaporated and the residue was purified by column chromatography on silica gel (petroleum ether/EtOAc: 6/1-4/1, v/v) to afford the desired product **2a** in 78% yield.

## 2.5 Mechanistic studies

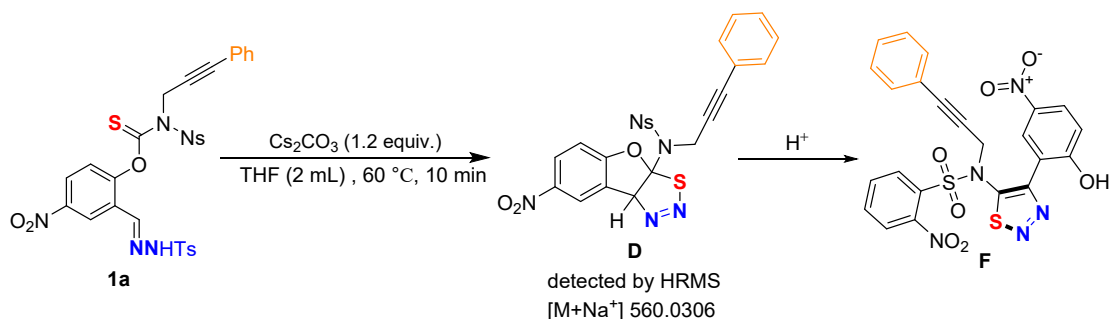

In an oven-dried 25 mL resealable Schlenk tube equipped with a magnetic stir bar was charged with *N*-tosylhydrazones **1a** (0.2 mmol, 1.0 equiv), Cs<sub>2</sub>CO<sub>3</sub> (2.4 mmol, 1.2 equiv). After that, argon was pumped three times, and anhydrous THF (2 mL) was added under N<sub>2</sub> atmosphere. Then the reaction mixture was stirred at 60 °C for 10 mins.



And the possible intermediate D was detected by HRMS.

Via HRMS

Species **D** was detected by HRMS:

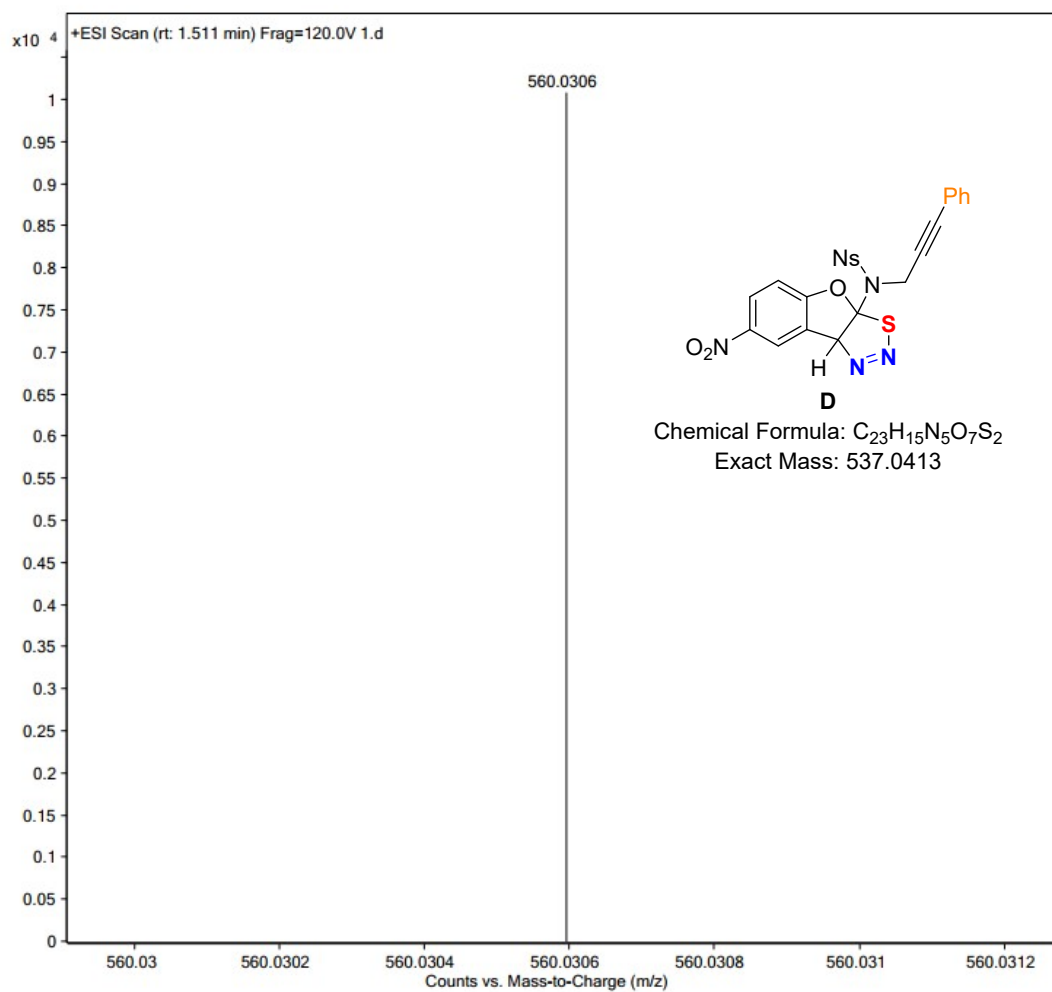

Proposed mechanism for the formation of **D**:

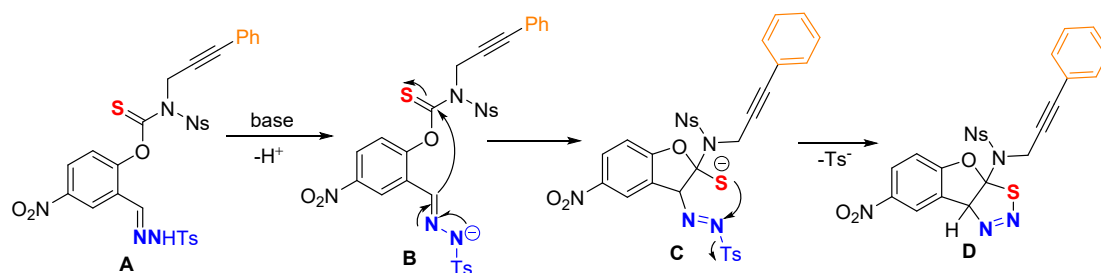

### 3. Characterization data for substrate 1 and products

#### Characterization data for substrate 1

#### (E)-O-(2-((2-tosylhydrazineylidene)methyl)phenyl) ((2-nitrophenyl)sulfonyl)(3-phenylprop-2-yn-1-yl)carbamothioate (1a)

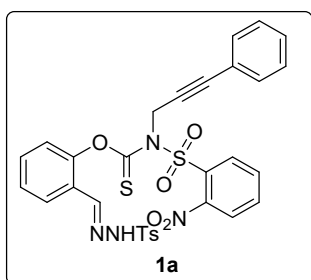

The title compound **1a** was purified by flash chromatography in PE/EA = 6/1-2/1 as yellow solid (118 mg, 91% yield), m.p. = 153–155 °C;  $^1\text{H NMR}$  (500 MHz, Chloroform-*d*)  $\delta$  8.41 (d,  $J$  = 10.0 Hz, 1H), 8.22 (d,  $J$  = 10.0 Hz, 1H), 7.90 (d,  $J$  = 5.0 Hz, 1H), 7.86 – 7.79 (m, 4H), 7.66 (t,  $J$  = 5.0 Hz, 1H), 7.51 (d,  $J$  = 5.0 Hz, 3H), 7.37 – 7.26 (m, 8H), 6.81 (d,  $J$  = 10.0 Hz, 1H), 5.31 (s, 2H), 2.42 (s, 3H);  $^{13}\text{C NMR}$  (126 MHz, Chloroform-*d*)  $\delta$  185.1, 150.8, 147.8, 144.3, 140.5, 135.4, 135.2, 132.8, 132.5, 132.0, 131.2, 129.9, 129.7, 128.8, 128.4, 128.2, 127.8, 127.4, 127.0, 126.2, 125.2, 122.6, 122.1, 84.8, 82.7, 42.4, 21.6; HRMS (ESI) calcd for (M+H) $^+$  C<sub>30</sub>H<sub>25</sub>N<sub>4</sub>O<sub>7</sub>S<sub>3</sub> $^+$ , 649.0880, found: 649.0882;

#### (E)-O-(4-nitro-2-((2-tosylhydrazineylidene)methyl)phenyl) ((2-nitrophenyl)sulfonyl)(3-phenylprop-2-yn-1-yl)carbamothioate (1b)

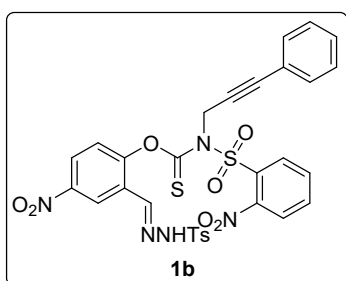

The title compound **1b** was purified by flash chromatography in PE/EA = 6/1-2/1 as yellow solid (120 mg, 87% yield), m.p. = 157–158 °C;  $^1\text{H NMR}$  (500 MHz, Chloroform-*d*)  $\delta$  8.64 (s, 1H), 8.44 (s, 1H), 8.24 (d,  $J$  = 5.0 Hz, 1H), 8.17 (d,  $J$  = 5.0 Hz, 1H), 7.92 (d,  $J$  = 5.0 Hz, 1H), 7.87 (d,  $J$  = 10.0 Hz, 3H), 7.22 (t,  $J$  = 10.0 Hz, 1H), 7.57 (s, 1H), 7.49 (d,  $J$  = 10.0 Hz, 1H), 7.40 – 7.28 (m, 5H), 7.03 (d,  $J$  = 10.0 Hz, 1H), 5.30 (s, 2H), 2.44 (s, 3H);  $^{13}\text{C NMR}$  (126 MHz, Chloroform-*d*)  $\delta$  183.7, 154.1, 147.8, 146.5, 144.8, 137.9, 135.7, 134.7, 132.7, 132.5, 131.9, 129.8, 129.1, 128.5, 128.1, 128.0, 125.5, 125.3, 124.3, 122.7, 121.8, 85.2, 82.2, 42.5, 21.6.; HRMS (ESI) calcd for (M+H) $^+$  C<sub>30</sub>H<sub>24</sub>N<sub>5</sub>O<sub>9</sub>S<sub>3</sub> $^+$ , 694.0731, found: 694.0735;

#### (E)-O-(4-chloro-2-((2-tosylhydrazineylidene)methyl)phenyl) ((2-nitrophenyl)sulfonyl)(3-phenylprop-2-yn-1-yl)carbamothioate (1c)

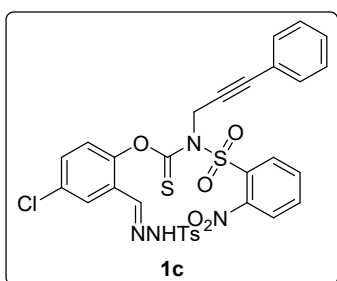

The title compound **1c** was purified by flash chromatography in PE/EA = 6/1-2/1 as yellow solid (116 mg, 85% yield), m.p. = 159–162 °C;  $^1\text{H NMR}$  (500 MHz,

**Chloroform-*d***)  $\delta$  8.69 (s, 1H), 8.20 (d,  $J = 5.0$  Hz, 1H), 7.89 (d,  $J = 5.0$  Hz, 1H), 7.83 – 7.78 (m, 4H), 7.67 (t,  $J = 10.0$  Hz, 1H), 7.47 (d,  $J = 10.0$  Hz, 3H), 7.35 – 7.30 (m, 6H), 7.29 (dd,  $J = 10.0, 5.0$  Hz, 1H), 6.77 (d,  $J = 5.0$  Hz, 1H), 5.29 (s, 2H), 2.41 (s, 3H);  **$^{13}\text{C}$  NMR (126 MHz, Chloroform-*d*)**  $\delta$  184.8, 171.5, 149.1, 147.8, 144.5, 139.1, 135.6, 135.0, 133.1, 132.6, 132.6, 131.9, 131.0, 129.8, 128.9, 128.4, 127.9, 127.8, 126.6, 125.4, 124.1, 122.0, 84.9, 82.7, 42.5, 21.6; **HRMS (ESI)** calcd for (M+H)<sup>+</sup> C<sub>30</sub>H<sub>23</sub>ClN<sub>4</sub>O<sub>7</sub>S<sub>3</sub><sup>+</sup>, 683.0490, found: 683.0491;

**(E)-O-(4-fluoro-2-((2-tosylhydrazineylidene)methyl)phenyl) ((2-nitrophenyl)sulfonyl)(3-phenylprop-2-yn-1-yl)carbamothioate (1d)**

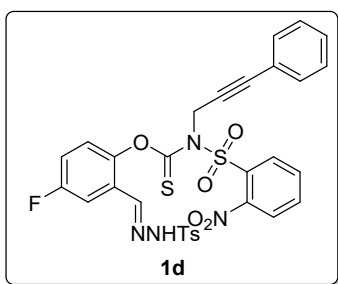

The title compound **1d** was purified by flash chromatography in PE/EA = 6/1-2/1 as yellow solid (110 mg, 83% yield), m.p. = 154–155 °C;  **$^1\text{H}$  NMR (500 MHz, Chloroform-*d*)**  $\delta$  8.90 (d,  $J = 10.0$  Hz, 1H), 8.21 (d,  $J = 10.0$  Hz, 1H), 7.89 (d,  $J = 10.0$  Hz, 1H), 7.85 – 7.77 (m, 3H), 7.66 (t,  $J = 10.0$  Hz, 1H), 7.51 (d,  $J = 10.0$  Hz, 1H), 7.48 – 7.44 (m, 3H), 7.35 – 7.28 (m, 6H), 7.03 (t,  $J = 10.0$  Hz, 1H), 6.79 (dd,  $J = 10.0, 5.0$  Hz, 1H), 5.30 (s, 2H), 2.40 (s, 3H);  **$^{13}\text{C}$  NMR (126 MHz, Chloroform-*d*)**  $\delta$  185.2, 171.6, 161.7, 159.7, 147.7, 146.7, 146.7, 144.5, 139.4, 135.7, 135.1, 132.6, 132.5, 131.9, 129.8, 128.9, 128.4, 127.8, 125.4, 124.4, 124.4, 122.0, 118.3, 118.1, 113.1, 112.9, 84.9, 82.8, 42.5, 21.6; **HRMS (ESI)** calcd for (M+H)<sup>+</sup> C<sub>30</sub>H<sub>24</sub>FN<sub>4</sub>O<sub>7</sub>S<sub>3</sub><sup>+</sup>, 667.0786, found: 667.0789;

**(E)-O-(4-nitro-2-((2-tosylhydrazineylidene)methyl)phenyl) ((3-nitrophenyl)sulfonyl)(3-phenylprop-2-yn-1-yl)carbamothioate (1e)**

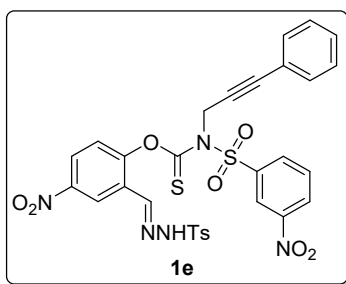

The title compound **1e** was purified by flash chromatography in PE/EA = 6/1-2/1 as yellow solid (123 mg, 89% yield), m.p. = 159–162 °C;  **$^1\text{H}$  NMR (500 MHz, Chloroform-*d*)**  $\delta$  11.07 (s, 1H), 8.93 (d,  $J = 5.0$  Hz, 1H), 8.64 (s, 1H), 8.52 (s, 1H), 8.52 (dd,  $J = 10.0, 5.0$  Hz, 1H), 8.42 (dd,  $J = 10.0, 5.0$  Hz, 1H), 8.17 (dd,  $J = 10.0, 5.0$  Hz, 1H), 7.86 (d,  $J = 10.0$  Hz, 3H), 7.76 (t,  $J = 10.0$  Hz, 1H), 7.67 (s, 1H), 7.49 (d,  $J = 10.0$  Hz, 2H), 7.43 – 7.33 (m, 6H), 6.92 (d,  $J = 10.0$  Hz, 1H), 5.48 (s, 2H), 2.44 (s, 3H);  **$^{13}\text{C}$  NMR (126 MHz, Chloroform-*d*)**  $\delta$  184.1, 154.0, 148.2, 146.5, 144.8, 140.5, 138.2, 134.8, 134.0, 131.9, 130.6, 129.8, 129.3, 128.9, 128.5, 128.2, 127.9, 125.4, 124.3, 123.6, 123.1, 121.4, 85.8, 81.9, 42.2, 21.6; **HRMS (ESI)** calcd for (M+H)<sup>+</sup> C<sub>30</sub>H<sub>24</sub>N<sub>5</sub>O<sub>9</sub>S<sub>3</sub><sup>+</sup>, 694.0731, found: 694.0730;

**(E)-O-(4-nitro-2-((2-tosylhydrazineylidene)methyl)phenyl)**

### dimethylcarbamothioate (1f)

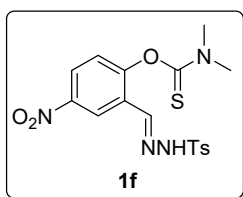

The title compound **1f** was purified by flash chromatography in PE/EA = 6/1-2/1 as yellow solid (78 mg, 93% yield), m.p. = 133–135 °C; <sup>1</sup>H NMR (500 MHz, Dimethyl Sulfoxide-*d*<sub>6</sub>) δ 11.86 (s, 1H), 8.42 (d, *J* = 5.0 Hz, 1H), 8.26 (dd, *J* = 10.0, 5.0 Hz, 1H), 7.93 (s, 1H), 7.77 (d, *J* = 5.0 Hz, 2H), 7.43 (t, *J* = 5.0 Hz, 3H), 3.36 (s, 6H), 2.37 (s, 3H); <sup>13</sup>C NMR (126 MHz, Dimethyl Sulfoxide-*d*<sub>6</sub>) δ 184.9, 156.3, 145.8, 144.2, 140.1, 136.4, 130.3, 128.6, 127.5, 126.7, 125.5, 121.3, 43.5, 21.4; HRMS (ESI) calcd for (M+H)<sup>+</sup> C<sub>17</sub>H<sub>19</sub>N<sub>4</sub>O<sub>5</sub>S<sub>2</sub><sup>+</sup>, 423.0791, found: 423.0790;

### (E)-O-(4-nitro-2-((2-tosylhydrazineylidene)methyl)phenyl) (3-(4-chlorophenyl)prop-2-yn-1-yl)((2-nitrophenyl)sulfonyl)carbamothioate (1g)

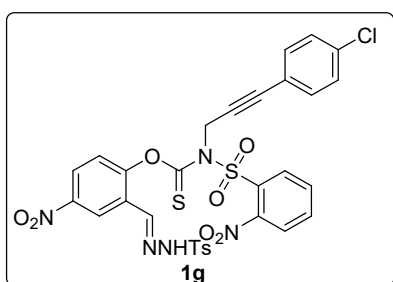

The title compound **1g** was purified by flash chromatography in PE/EA = 6/1-2/1 as yellow solid (128 mg, 88% yield), m.p. = 133–139 °C; <sup>1</sup>H NMR (500 MHz, Chloroform-*d*) δ 11.08 (s, 1H), 8.63 (d, *J* = 10.0 Hz, 1H), 8.24 – 8.16 (m, 2H), 7.95 (d, *J* = 10.0 Hz, 1H), 7.86 (d, *J* = 10.0 Hz, 3H), 7.72 (t, *J* = 10.0 Hz, 1H), 7.61 (s, 1H), 7.53 (s, 1H), 7.51 (d, *J* = 5.0 Hz, 1H), 7.42 (d, *J* = 10.0 Hz, 1H), 7.37 (d, *J* = 10.0 Hz, 2H), 7.23 (t, *J* = 5.0 Hz, 1H), 7.06 (d, *J* = 10.0 Hz, 1H), 5.29 (s, 2H), 2.44 (s, 3H); <sup>13</sup>C NMR (126 MHz, Chloroform-*d*) δ 183.7, 154.0, 147.8, 146.5, 144.8, 137.9, 135.8, 134.7, 134.6, 132.7, 132.6, 132.5, 132.1, 130.6, 129.9, 128.1, 127.9, 125.5, 124.3, 123.9, 122.7, 122.1, 83.6, 83.5, 42.5, 21.6; HRMS (ESI) calcd for (M+H)<sup>+</sup> C<sub>30</sub>H<sub>23</sub>ClN<sub>5</sub>O<sub>9</sub>S<sub>3</sub><sup>+</sup>, 728.0341, found: 728.0343;

### (E)-O-(4-nitro-2-((2-tosylhydrazineylidene)methyl)phenyl) (3-(4-bromophenyl)prop-2-yn-1-yl)((2-nitrophenyl)sulfonyl)carbamothioate (1h)

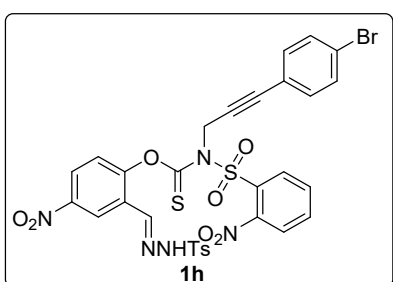

The title compound **1h** was purified by flash chromatography in PE/EA = 6/1-2/1 as yellow solid (134 mg, 87% yield), m.p. = 135–138 °C; <sup>1</sup>H NMR (500 MHz, Chloroform-*d*) δ 8.60 (s, 1H), 8.21 (d, *J* =

5.0 Hz, 1H), 8.15 (d,  $J = 5.0$  Hz, 1H), 7.93 (d,  $J = 5.0$  Hz, 1H), 7.86 – 7.82 (m, 3H), 7.71 – 7.67 (m, 1H), 7.56 (s, 1H), 7.44 (d,  $J = 5.0$  Hz, 2H), 7.34 – 7.28 (m, 4H), 7.03 (d,  $J = 5.0$  Hz, 1H), 5.27 (s, 2H), 2.41 (s, 3H);  $^{13}\text{C}$  NMR (126 MHz, Chloroform-*d*)  $\delta$  183.8, 171.4, 154.1, 147.7, 146.4, 144.8, 138.1, 135.9, 134.8, 133.4, 132.7, 132.6, 132.4, 131.6, 129.8, 128.2, 127.9, 125.5, 125.4, 124.3, 123.2, 122.6, 120.9, 84.1, 83.5, 42.6, 21.6; HRMS (ESI) calcd for (M+H)<sup>+</sup> C<sub>30</sub>H<sub>23</sub>BrN<sub>5</sub>O<sub>9</sub>S<sub>3</sub><sup>+</sup>, 771.9836, found: 771.9839;

**(E)-O-(4-nitro-2-((2-tosylhydrazineylidene)methyl)phenyl) (3-(3-bromophenyl)prop-2-yn-1-yl)((2-nitrophenyl)sulfonyl)carbamothioate (1i)**

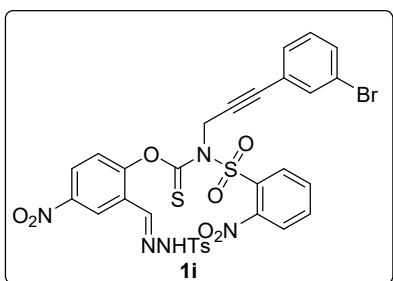

The title compound **1i** was purified by flash chromatography in PE/EA = 6/1-2/1 as yellow solid (119 mg, 77% yield), m.p. = 143–144 °C;  $^1\text{H}$  NMR (500 MHz, Chloroform-*d*)  $\delta$  11.08 (s, 1H), 8.66 (s, 1H), 8.64 (d,  $J = 5.0$  Hz, 1H), 8.21 (d,  $J = 10.0$  Hz, 1H), 8.18 (d,  $J = 10.0$  Hz, 1H), 7.94 (t,  $J = 10.0$  Hz, 1H), 7.86 (d,  $J = 10.0$  Hz, 3H), 7.71 (t,  $J = 5.0$  Hz, 1H), 7.54 (s, 1H), 7.42 – 7.28 (m, 7H), 7.05 (d,  $J = 10.0$  Hz,

1H), 5.28 (s, 2H), 2.44 (s, 3H);  $^{13}\text{C}$  NMR (126 MHz, Chloroform-*d*)  $\delta$  183.7, 162.6, 154.1, 147.8, 146.5, 144.8, 144.8, 143.7, 138.4, 138.0, 135.8, 135.1, 134.7, 133.2, 132.6, 132.6, 132.5, 129.9, 128.7, 128.1, 128.0, 127.9, 125.5, 124.3, 123.7, 122.7, 121.4, 120.4, 84.0, 83.2, 42.6, 21.6; HRMS (ESI) calcd for (M+H)<sup>+</sup> C<sub>30</sub>H<sub>23</sub>BrN<sub>5</sub>O<sub>9</sub>S<sub>3</sub><sup>+</sup>, 771.9836, found: 771.9838;

**(E)-O-(4-nitro-2-((2-tosylhydrazineylidene)methyl)phenyl) (3-(2-bromophenyl)prop-2-yn-1-yl)((2-nitrophenyl)sulfonyl)carbamothioate (1j)**

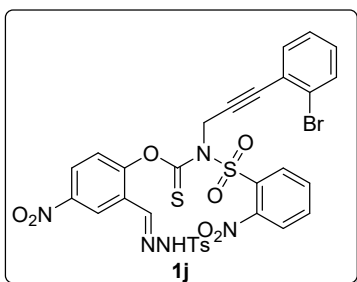

The title compound **1j** was purified by flash chromatography in PE/EA = 6/1-2/1 as yellow solid (125 mg, 81% yield), m.p. = 141–142 °C;  $^1\text{H}$  NMR (500 MHz, Chloroform-*d*)  $\delta$  11.08 (s, 1H), 8.66 (s, 1H), 8.64 (d,  $J = 5.0$  Hz, 1H), 8.21 (d,  $J = 10.0$  Hz, 1H), 8.18 (d,  $J = 10.0$  Hz, 1H), 7.94 (t,  $J = 10.0$  Hz, 1H), 7.86 (d,  $J = 10.0$  Hz, 3H), 7.71 (t,  $J = 5.0$  Hz, 1H), 7.54 (s, 1H), 7.42 – 7.28 (m, 7H), 7.05 (d,  $J = 10.0$  Hz, 1H), 5.28 (s, 2H), 2.44 (s,

3H);  $^{13}\text{C}$  NMR (126 MHz, Chloroform-*d*)  $\delta$  183.7, 162.6, 154.1, 147.8, 146.5, 144.8, 144.8, 143.7, 138.4, 138.0, 135.8, 135.1, 134.7, 133.2, 132.6, 132.6, 132.5, 129.9,

128.7, 128.1, 128.0, 127.9, 125.5, 124.3, 123.7, 122.7, 121.4, 120.4, 84.0, 83.2, 42.6, 21.6; **HRMS (ESI)** calcd for (M+H)<sup>+</sup> C<sub>30</sub>H<sub>23</sub>BrN<sub>5</sub>O<sub>9</sub>S<sub>3</sub><sup>+</sup>, 771.9836, found: 771.9838;

**(E)-O-(4-nitro-2-((2-tosylhydrazineylidene)methyl)phenyl) (3-(2-fluorophenyl)prop-2-yn-1-yl)((2-nitrophenyl)sulfonyl)carbamothioate (1k)**

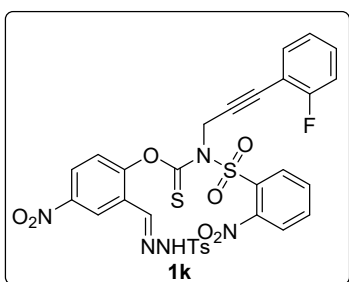

The title compound **1k** was purified by flash chromatography in PE/EA = 6/1-2/1 as yellow solid (121 mg, 85% yield), m.p. = 163–165 °C; <sup>1</sup>H NMR (500 MHz, Chloroform-*d*) δ 11.06 (s, 1H), 8.69 (d, *J* = 5.0 Hz, 1H), 8.53 (s, 1H), 8.27 (d, *J* = 5.0 Hz, 1H), 8.17 (d, *J* = 10.0 Hz, 1H), 7.91 – 7.85 (m, 4H), 7.76 (t, *J* = 10.0 Hz, 1H), 7.58 (s, 1H), 7.51 (t, *J* = 10.0 Hz, 1H), 7.41 – 7.35 (m, 3H), 7.18 (d, *J* = 10.0 Hz, 1H), 6.96 (d, *J* = 10.0 Hz, 1H),

5.35 (s, 2H), 2.44 (s, 3H); <sup>13</sup>C NMR (126 MHz, Chloroform-*d*) δ 183.6, 162.0, 154.1, 147.9, 146.5, 144.7, 137.8, 135.7, 134.9, 133.6, 132.6, 132.5, 132.4, 130.8, 129.8, 128.2, 127.9, 125.4, 125.3, 124.2, 124.2, 122.6, 115.7, 115.5, 87.5, 78.8, 42.4, 21.6; **HRMS (ESI)** calcd for (M+H)<sup>+</sup> C<sub>30</sub>H<sub>23</sub>FN<sub>5</sub>O<sub>9</sub>S<sub>3</sub><sup>+</sup>, 712.0636, found: 712.0634;

**(E)-O-(4-nitro-2-((2-tosylhydrazineylidene)methyl)phenyl) (3-(4-chlorophenyl)prop-2-yn-1-yl)((2-nitrophenyl)sulfonyl)carbamothioate (1l)**

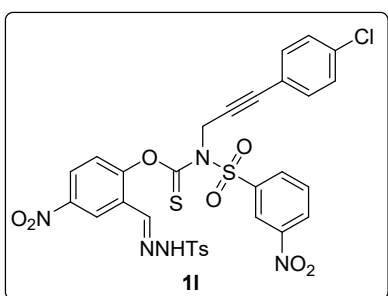

The title compound **1l** was purified by flash chromatography in PE/EA = 6/1-2/1 as yellow solid (132 mg, 91% yield), m.p. = 128–129 °C; <sup>1</sup>H NMR (500 MHz, Chloroform-*d*) δ 11.06 (s, 1H), 8.92 (d, *J* = 5.0 Hz, 1H), 8.63 (d, *J* = 5.0 Hz, 2H), 8.53 (d, *J* = 10.0 Hz, 1H), 8.17 (d, *J* = 10.0 Hz, 2H), 8.02 (s, 1H), 7.87 (t, *J* = 10.0 Hz, 3H), 7.77 (t, *J* = 10.0 Hz, 1H), 7.44 (d, *J* = 10.0 Hz, 2H), 7.39 – 7.33 (m, 6H), 7.04 (d, *J* =

10.0 Hz, 1H), 6.92 (d, *J* = 10.0 Hz, 1H), 5.47 (s, 2H), 2.44 (s, 3H); <sup>13</sup>C NMR (126 MHz, Chloroform-*d*) δ 184.2, 163.0, 154.0, 148.5, 148.2, 146.5, 145.2, 144.8, 140.5, 140.4, 138.5, 135.3, 134.7, 134.1, 133.2, 130.6, 130.2, 130.0, 129.9, 128.9, 128.8, 128.6, 128.2, 127.9, 127.8, 127.1, 126.8, 125.5, 124.3, 123.5, 123.1, 119.9, 117.8, 116.9, 84.6, 82.9, 42.2, 21.6, 21.6; **HRMS (ESI)** calcd for (M+H)<sup>+</sup> C<sub>30</sub>H<sub>23</sub>ClN<sub>5</sub>O<sub>9</sub>S<sub>3</sub><sup>+</sup>, 728.0341, found: 728.0343;

**(E)-O-(4-nitro-2-((2-tosylhydrazineylidene)methyl)phenyl) ((3-**

### nitrophenyl)sulfonyl)(3-(*o*-tolyl)prop-2-yn-1-yl)carbamothioate (1m)

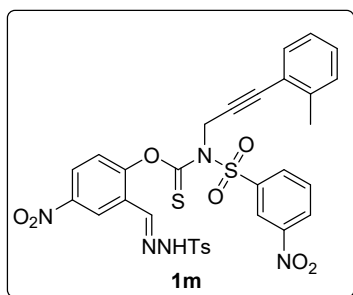

The title compound **1m** was purified by flash chromatography in PE/EA = 6/1-2/1 as yellow solid (123 mg, 87% yield), m.p. = 155–157 °C; <sup>1</sup>H NMR (500 MHz, Chloroform-*d*) δ 11.20 (s, 1H), 8.90 (s, 1H), 8.65 (d, *J* = 15.0 Hz, 2H), 8.50 (d, *J* = 5.0 Hz, 1H), 8.40 (d, *J* = 5.0 Hz, 1H), 8.17 (q, *J* = 5.0 Hz, 1H), 7.86 (d, *J* = 5.0 Hz, 2H), 7.75 (t, *J* = 10.0 Hz, 1H), 7.67 (s, 1H), 7.45 (d, *J* = 10.0 Hz, 1H), 7.37 (d, *J* = 10.0 Hz, 1H), 7.32 (t, *J* = 10.0 Hz,

1H), 7.24 (d, *J* = 5.0 Hz, 1H), 7.21 (t, *J* = 10.0 Hz, 1H), 6.88 (d, *J* = 10.0 Hz, 1H), 5.50 (s, 2H), 2.44 (s, 3H), 2.40 (s, 3H); <sup>13</sup>C NMR (126 MHz, Chloroform-*d*) δ 184.1, 154.0, 148.2, 146.5, 144.8, 140.8, 140.6, 138.2, 134.8, 133.9, 132.2, 130.6, 129.9, 129.7, 129.3, 128.9, 128.2, 127.9, 125.8, 125.4, 124.3, 123.6, 123.1, 121.2, 85.7, 84.7, 42.5, 21.6, 20.6; HRMS (ESI) calcd for (M+H)<sup>+</sup> C<sub>31</sub>H<sub>26</sub>N<sub>5</sub>O<sub>9</sub>S<sub>3</sub><sup>+</sup>, 708.0887, found: 708.0889;

### (E)-O-(4-nitro-2-((2-tosylhydrazineylidene)methyl)phenyl) (3-(2-methoxyphenyl)prop-2-yn-1-yl)((3-nitrophenyl)sulfonyl)carbamothioate (1n)

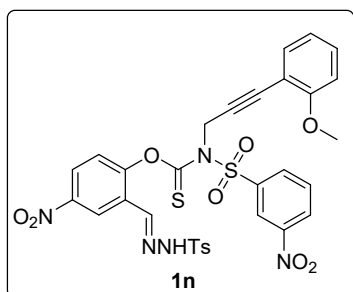

The title compound **1n** was purified by flash chromatography in PE/EA = 6/1-2/1 as yellow solid (123 mg, 85% yield), m.p. = 165–169 °C; <sup>1</sup>H NMR (500 MHz, Chloroform-*d*) δ 11.11 (s, 1H), 8.92 (s, 1H), 8.76 (s, 1H), 8.67 (s, 1H), 8.48 (s, 2H), 8.17 (d, *J* = 10.0 Hz, 1H), 7.82 (d, *J* = 10.0 Hz, 2H), 7.73 (t, *J* = 5.0 Hz, 1H), 7.61 (s, 1H), 7.42–7.29 (m, 4H), 7.00 (d, *J* = 5.0 Hz, 3H), 5.50 (s, 2H), 3.83 (s, 3H), 2.43 (s, 3H); <sup>13</sup>C NMR (126 MHz,

Chloroform-*d*) δ 184.1, 160.2, 154.0, 148.1, 146.5, 144.6, 140.3, 137.9, 134.9, 134.1, 133.8, 131.0, 130.4, 129.8, 128.8, 128.3, 127.9, 125.4, 124.3, 123.9, 122.8, 121.2, 112.0, 110.9, 86.1, 82.3, 56.4, 42.2, 21.6; HRMS (ESI) calcd for (M+H)<sup>+</sup> C<sub>31</sub>H<sub>26</sub>N<sub>5</sub>O<sub>10</sub>S<sub>3</sub><sup>+</sup>, 724.0836, found: 724.0838;

### (E)-O-(4-nitro-2-((2-tosylhydrazineylidene)methyl)phenyl) (3-(3-bromophenyl)prop-2-yn-1-yl)((3-nitrophenyl)sulfonyl)carbamothioate (1o)

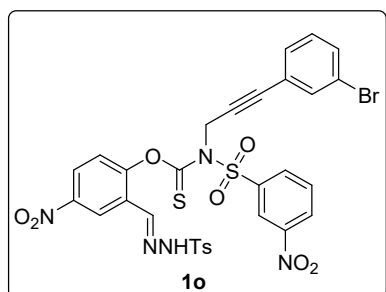

The title compound **1o** was purified by flash chromatography in PE/EA = 6/1-2/1 as yellow solid

(126 mg, 82% yield), m.p. = 157–158 °C; <sup>1</sup>H NMR (500 MHz, Chloroform-*d*) δ 11.12 (s, 1H), 8.90 (s, 1H), 8.60 (d, *J* = 5.0 Hz, 1H), 8.52 (d, *J* = 10.0 Hz, 1H), 8.39 (d, *J* = 10.0 Hz, 1H), 8.16 – 8.11 (m, 2H), 8.07 (d, *J* = 5.0 Hz, 1H), 8.02 (d, *J* = 5.0 Hz, 1H), 7.91 – 7.80 (m, 4H), 7.77 (t, *J* = 5.0 Hz, 1H), 7.70 (d, *J* = 5.0 Hz, 1H), 7.59 (d, *J* = 5.0 Hz, 1H), 7.50 (d, *J* = 5.0 Hz, 1H), 7.43 (q, *J* = 10.0 Hz, 1H), 7.38 – 7.32 (m, 4H), 7.24 (d, *J* = 5.0 Hz, 2H), 6.92 (d, *J* = 10.0 Hz, 1H), 5.46 (s, 2H), 2.42 (s, 3H); <sup>13</sup>C NMR (126 MHz, Chloroform-*d*) δ 184.2, 163.0, 153.9, 148.5, 148.2, 146.5, 145.1, 144.8, 140.4, 140.3, 138.6, 138.6, 134.8, 134.7, 134.6, 134.2, 134.1, 132.3, 130.7, 130.5, 130.1, 129.9, 129.9, 129.9, 129.7, 129.0, 128.2, 127.9, 127.8, 127.0, 126.8, 125.5, 124.4, 123.6, 123.5, 123.2, 122.2, 117.8, 117.0, 84.0, 83.4, 83.3, 42.2, 21.6; HRMS (ESI) calcd for (M+H)<sup>+</sup> C<sub>30</sub>H<sub>23</sub>BrN<sub>5</sub>O<sub>9</sub>S<sub>3</sub><sup>+</sup>, 771.9836, found: 771.9833;

## Characterization of Products

### N-(4-(2-hydroxy-5-nitrophenyl)-1,2,3-thiadiazol-5-yl)-2-nitro-N-(3-phenylprop-2-yn-1-yl)benzenesulfonamide (2a)

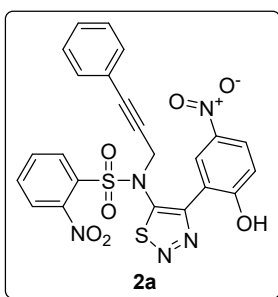

The title compound **2a** was purified by flash chromatography in PE/EA = 4/1-2/1 as yellow oil (98 mg, 91% yield); <sup>1</sup>H NMR (500 MHz, Chloroform-*d*) δ 7.95 (d, *J* = 10.0 Hz, 1H), 7.72 (d, *J* = 10.0 Hz, 1H), 7.68 – 7.66 (m, 2H), 7.63 (t, *J* = 5.0 Hz, 1H), 7.54 (t, *J* = 5.0 Hz, 1H), 7.28 – 7.25 (m, 5H), 6.88 (d, *J* = 10.0 Hz, 1H), 4.73 (s, 2H); <sup>13</sup>C NMR (126 MHz, Chloroform-*d*) δ 162.2, 154.7, 150.6, 147.4, 139.6, 136.5, 133.2, 131.9, 131.8, 129.9, 129.2, 129.1, 127.6, 127.4, 125.2, 121.3, 117.3, 116.8, 88.0, 83.4, 43.0; HRMS (ESI) calcd for (M+H)<sup>+</sup> C<sub>23</sub>H<sub>16</sub>N<sub>5</sub>O<sub>7</sub>S<sub>2</sub><sup>+</sup>, 538.0486, found: 538.0487;

### N-(3-(4-fluorophenyl)prop-2-yn-1-yl)-N-(4-(2-hydroxy-5-nitrophenyl)-1,2,3-thiadiazol-5-yl)-2-nitrobenzenesulfonamide (2b)

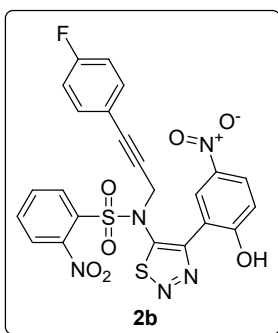

The title compound **2b** was purified by flash chromatography in PE/EA = 4/1-2/1 as yellow oil (98 mg, 88% yield); <sup>1</sup>H NMR (500 MHz, Dimethyl Sulfoxide-*d*<sub>6</sub>) δ 11.78 (s, 1H), 8.14 (dd, *J* = 10.0, 5.0 Hz, 1H), 7.91 (d, *J* = 5.0 Hz, 1H), 7.88 – 7.84 (m, 2H), 7.81 (t, *J* = 5.0 Hz, 1H), 7.71 (t, *J* = 5.0 Hz, 1H), 7.34 (d, *J* = 5.0 Hz, 2H), 7.25 (d, *J* = 5.0 Hz, 2H), 7.06 (d, *J* = 10.0 Hz, 1H), 4.90 (s, 2H), 2.35 (s, 3H); <sup>13</sup>C NMR (126 MHz, Dimethyl Sulfoxide-*d*<sub>6</sub>) δ 162.2, 154.7, 150.6, 147.4, 139.8, 139.6, 136.5, 133.2, 131.8, 129.8, 129.1, 127.6, 127.4, 125.2, 118.3, 117.3, 116.8, 88.2, 82.8, 43.0, 21.5; HRMS (ESI) calcd for (M+H)<sup>+</sup> C<sub>23</sub>H<sub>15</sub>FN<sub>5</sub>O<sub>7</sub>S<sub>2</sub><sup>+</sup>, 556.0391, found: 556.0390;



**N-(3-(4-chlorophenyl)prop-2-yn-1-yl)-N-(4-(2-hydroxy-5-nitrophenyl)-1,2,3-thiadiazol-5-yl)-2-nitrobenzenesulfonamide (2c)**

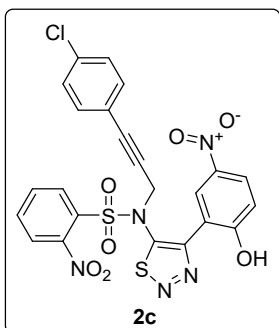

The title compound **2c** was purified by flash chromatography in PE/EA = 4/1-2/1 as yellow oil (99 mg, 87% yield);  $^1\text{H NMR}$  (500 MHz, Dimethyl Sulfoxide- $\text{d}_6$ )  $\delta$  11.66 (s, 1H), 8.43 (dd,  $J = 8.4, 2.3$  Hz, 1H), 8.34 (t,  $J = 2.1$  Hz, 1H), 8.19 (d,  $J = 2.9$  Hz, 1H), 8.17 (dd,  $J = 9.0, 2.9$  Hz, 1H), 8.09 (dt,  $J = 8.0, 1.2$  Hz, 1H), 7.79 (t,  $J = 8.1$  Hz, 1H), 7.50 – 7.44 (m, 2H), 7.35 – 7.30 (m, 2H), 7.04 (d,  $J = 9.0$  Hz, 1H), 4.99 (s, 2H);  $^{13}\text{C NMR}$  (126 MHz, Dimethyl Sulfoxide- $\text{d}_6$ )  $\delta$  154.7, 151.3, 148.1, 139.6, 138.4, 134.7, 134.4, 133.4, 131.9, 129.4, 129.2, 127.8, 127.5, 123.0, 120.0, 117.8, 117.0, 86.9, 84.3, 43.2; HRMS (ESI) calcd for  $(\text{M}+\text{H})^+$   $\text{C}_{23}\text{H}_{15}\text{ClN}_5\text{O}_7\text{S}_2^+$ , 572.0096, found: 572.0098;

**N-(3-(4-bromophenyl)prop-2-yn-1-yl)-N-(4-(2-hydroxy-5-nitrophenyl)-1,2,3-thiadiazol-5-yl)-2-nitrobenzenesulfonamide (2d)**

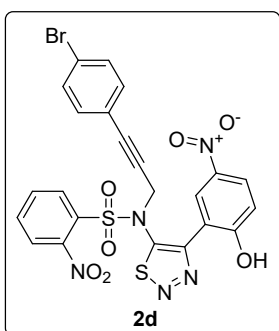

The title compound **2d** was purified by flash chromatography in PE/EA = 4/1-2/1 as yellow solid (105 mg, 85% yield), m.p. = 193–195 °C;  $^1\text{H NMR}$  (500 MHz, Dimethyl Sulfoxide- $\text{d}_6$ )  $\delta$  11.79 (s, 1H), 8.13 (dd,  $J = 10.0, 5.0$  Hz, 1H), 7.89 – 7.84 (m, 3H), 7.82 (t,  $J = 5.0$  Hz, 1H), 7.72 (t,  $J = 5.0$  Hz, 1H), 7.65 (t,  $J = 10.0$  Hz, 2H), 7.40 (d,  $J = 10.0$  Hz, 2H), 7.06 (d,  $J = 10.0$  Hz, 1H), 4.91 (s, 2H);  $^{13}\text{C NMR}$  (126 MHz, Dimethyl Sulfoxide- $\text{d}_6$ )  $\delta$  162.3, 154.7, 150.6, 147.4, 139.5, 136.6, 133.8, 133.2, 132.3, 131.8, 129.0, 127.6, 127.4, 125.2, 123.4, 120.5, 117.2, 116.9, 86.8, 84.7, 43.0; HRMS (ESI) calcd for  $(\text{M}+\text{H})^+$   $\text{C}_{23}\text{H}_{15}\text{BrN}_5\text{O}_7\text{S}_2^+$ , 615.9591, found: 615.9590;

**N-(4-(2-hydroxy-5-nitrophenyl)-1,2,3-thiadiazol-5-yl)-N-(3-(4-methoxyphenyl)prop-2-yn-1-yl)-2-nitrobenzenesulfonamide (2e)**

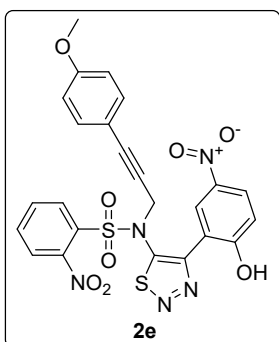

The title compound **2e** was purified by flash chromatography in PE/EA = 4/1-2/1 as yellow oil (96 mg, 85% yield);  $^1\text{H NMR}$  (500 MHz, Dimethyl Sulfoxide- $\text{d}_6$ )  $\delta$  11.90 (s, 1H), 8.14 (dd,  $J = 10.0, 5.0$  Hz, 1H), 7.91 (d,  $J = 5.0$  Hz, 1H), 7.86 (t,  $J = 10.0$  Hz, 2H), 7.82 (t,  $J = 10.0$  Hz, 1H), 7.73 (t,  $J = 10.0$  Hz, 1H), 7.39 (d,  $J = 5.0$  Hz, 2H), 7.05 (d,  $J = 10.0$  Hz, 1H), 7.00 (d,  $J =$

10.0 Hz, 2H), 4.89 (s, 2H), 3.80 (s, 3H);  $^{13}\text{C}$  NMR (126 MHz, Dimethyl Sulfoxide- $d_6$ )  $\delta$  162.3, 160.5, 154.7, 150.6, 147.5, 139.5, 136.5, 133.6, 133.2, 131.8, 129.1, 127.6, 127.4, 125.1, 117.3, 116.8, 114.9, 113.1, 88.3, 81.9, 74.4, 66.7, 56.3, 55.8, 43.1; HRMS (ESI) calcd for  $(\text{M}+\text{H})^+$   $\text{C}_{24}\text{H}_{18}\text{N}_5\text{O}_8\text{S}_2^+$ , 568.0591, found: 568.0590;

### N-(4-(2-hydroxy-5-nitrophenyl)-1,2,3-thiadiazol-5-yl)-2-nitro-N-(3-(p-tolyl)prop-2-yn-1-yl)benzenesulfonamide (2f)

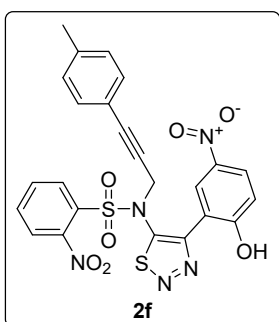

The title compound **2f** was purified by flash chromatography in PE/EA = 4/1-2/1 as yellow solid (91 mg, 83% yield), m.p. = 187–188 °C;  $^1\text{H}$  NMR (500 MHz, Dimethyl Sulfoxide- $d_6$ )  $\delta$  11.86 (s, 1H), 8.13 (dd,  $J$  = 10.0, 5.0 Hz, 1H), 7.90 – 7.84 (m, 3H), 7.81 (t,  $J$  = 5.0 Hz, 1H), 7.71 (t,  $J$  = 5.0 Hz, 1H), 7.53 – 7.50 (m, 2H), 7.30 (t,  $J$  = 5.0 Hz, 2H), 7.05 (d,  $J$  = 10.0 Hz, 1H), 4.91 (s, 2H);  $^{13}\text{C}$  NMR (126 MHz, Dimethyl Sulfoxide- $d_6$ )  $\delta$  163.8, 162.3, 161.9, 154.7, 150.6, 147.4, 139.5, 136.6, 134.4, 134.3, 133.2, 131.8, 129.1, 127.6, 127.4, 125.2, 117.7, 117.3, 116.9, 116.6, 116.5, 86.9, 83.3, 42.9; HRMS (ESI) calcd for  $(\text{M}+\text{H})^+$   $\text{C}_{24}\text{H}_{18}\text{N}_5\text{O}_7\text{S}_2^+$ , 552.0642, found: 552.0645;

### N-(3-(2-cyanophenyl)prop-2-yn-1-yl)-N-(4-(2-hydroxy-5-nitrophenyl)-1,2,3-thiadiazol-5-yl)-2-nitrobenzenesulfonamide (2g)

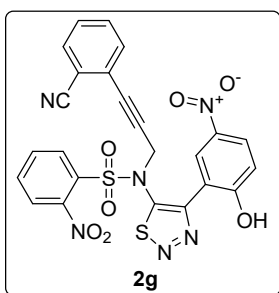

The title compound **2g** was purified by flash chromatography in PE/EA = 2/1-1/1 as yellow oil (96 mg, 85% yield);  $^1\text{H}$  NMR (500 MHz, Dimethyl Sulfoxide- $d_6$ )  $\delta$  11.82 (s, 1H), 8.12 (dd,  $J$  = 9.1, 2.9 Hz, 1H), 7.91 – 7.82 (m, 3H), 7.80 (td,  $J$  = 7.7, 1.4 Hz, 1H), 7.70 (td,  $J$  = 7.7, 1.3 Hz, 1H), 7.55 – 7.51 (m, 2H), 7.39 – 7.31 (m, 1H), 7.28 (td,  $J$  = 7.6, 1.1 Hz, 1H), 7.04 (d,  $J$  = 9.2 Hz, 1H), 4.96 (s, 2H);  $^{13}\text{C}$  NMR (126 MHz, Dimethyl Sulfoxide- $d_6$ )  $\delta$  154.7, 151.3, 148.1, 138.4, 134.7, 134.4, 133.4, 131.9, 129.4, 129.2, 127.8, 127.5, 123.0, 120.0, 117.8, 117.0, 86.9, 84.3, 43.2; HRMS (ESI) calcd for  $(\text{M}+\text{H})^+$   $\text{C}_{24}\text{H}_{15}\text{N}_6\text{O}_7\text{S}_2^+$ , 563.0438, found: 563.0441;

### N-(3-(2-bromophenyl)prop-2-yn-1-yl)-N-(4-(2-hydroxy-5-nitrophenyl)-1,2,3-thiadiazol-5-yl)-2-nitrobenzenesulfonamide (2h)

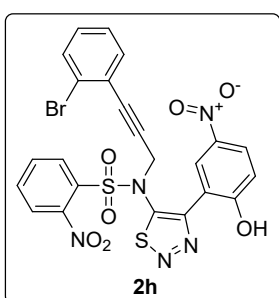

The title compound **2h** was purified by flash chromatography in PE/EA = 4/1-2/1 as yellow oil (95 mg, 77% yield);  $^1\text{H}$  NMR (500 MHz, Dimethyl Sulfoxide- $d_6$ )  $\delta$  11.79 (s, 1H), 8.13 (dd,  $J$  = 10.0, 5.0 Hz, 1H), 7.91 (d,  $J$  = 5.0 Hz, 1H), 7.89 – 7.85 (m,

2H), 7.82 (t,  $J = 5.0$  Hz, 1H), 7.74 – 7.71 (m, 2H), 7.56 (d,  $J = 5.0$  Hz, 1H), 7.47 (t,  $J = 5.0$  Hz, 1H), 7.41 – 7.37 (m, 1H), 7.06 (d,  $J = 10.0$  Hz, 1H), 4.97 (s, 2H);  $^{13}\text{C}$  NMR (126 MHz, Dimethyl Sulfoxide- $d_6$ )  $\delta$  172.4, 162.2, 154.5, 153.6, 147.4, 139.6, 136.5, 134.3, 133.3, 133.0, 131.8, 131.6, 129.3, 128.3, 127.5, 125.3, 125.0, 123.3, 117.2, 116.8, 87.7, 86.0, 43.0, 21.4; HRMS (ESI) calcd for  $(\text{M}+\text{H})^+$   $\text{C}_{23}\text{H}_{15}\text{BrN}_5\text{O}_7\text{S}_2^+$ , 615.9591, found: 615.9593;

### N-(4-(2-hydroxy-5-nitrophenyl)-1,2,3-thiadiazol-5-yl)-N-(3-(2-

### methoxyphenyl)prop-2-yn-1-yl)-2-nitrobenzenesulfonamide (2i)

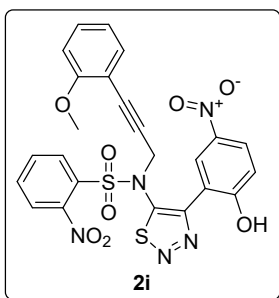

The title compound **2i** was purified by flash chromatography in PE/EA = 4/1-2/1 as yellow solid (82 mg, 72% yield), m.p. = 189–191 °C;  $^1\text{H}$  NMR (500 MHz, Dimethyl Sulfoxide- $d_6$ )  $\delta$  11.99 (s, 1H), 8.39 (d,  $J = 5.0$  Hz, 1H), 8.29 (d,  $J = 10.0$  Hz, 1H), 8.24 (q,  $J = 5.0$  Hz, 1H), 8.20 (d,  $J = 10.0$  Hz, 1H), 8.01 (t,  $J = 10.0$  Hz, 1H), 7.89 (t,  $J = 10.0$  Hz, 1H), 7.75 (d,  $J = 10.0$  Hz, 2H), 7.52 (d,  $J = 5.0$  Hz, 1H), 7.44 (d,  $J = 5.0$  Hz, 2H), 7.33 – 7.24 (m, 4H), 7.11 (d,  $J = 10.0$  Hz, 1H), 5.34 (s, 2H), 3.35 (s,

3H);  $^{13}\text{C}$  NMR (126 MHz, Dimethyl Sulfoxide- $d_6$ )  $\delta$  184.7, 162.2, 154.1, 147.7, 146.7, 144.3, 138.6, 137.7, 137.2, 136.3, 133.9, 132.5, 132.0, 131.1, 130.4, 130.3, 129.2, 129.1, 128.4, 127.6, 126.3, 125.2, 121.6, 121.4, 84.9, 83.2, 42.7, 21.4, 21.1; HRMS (ESI) calcd for  $(\text{M}+\text{H})^+$   $\text{C}_{24}\text{H}_{18}\text{N}_5\text{O}_8\text{S}_2^+$ , 568.0591, found: 568.0590;

### N-(4-(2-hydroxy-5-nitrophenyl)-1,2,3-thiadiazol-5-yl)-3-nitro-N-(3-

### phenylprop-2-yn-1-yl)benzenesulfonamide (2j)

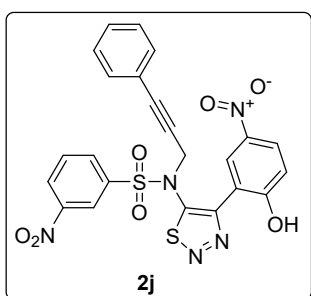

The title compound **2j** was purified by flash chromatography in PE/EA = 4/1-2/1 as yellow solid (89 mg, 83% yield), m.p. = 173–175 °C;  $^1\text{H}$  NMR (500 MHz, Chloroform- $d$ )  $\delta$  8.38 (d,  $J = 5.0$  Hz, 1H), 8.11 (dd,  $J = 10.0, 5.0$  Hz, 1H), 7.92 (d,  $J = 10.0$  Hz, 1H), 7.81 (d,  $J = 10.0$  Hz, 1H), 7.77 (t,  $J = 10.0$  Hz, 1H), 7.63 (t,  $J = 10.0$  Hz, 1H), 7.41 – 7.32 (m, 5H), 7.14 (d,  $J = 10.0$  Hz, 1H), 4.92 (s, 2H);  $^{13}\text{C}$  NMR (126 MHz, Chloroform- $d$ )  $\delta$  161.7, 152.2, 150.2, 147.8, 140.4, 135.5,

132.5, 131.8, 131.3, 131.2, 129.4, 128.4, 127.2, 125.5, 122.8, 121.0, 118.9, 114.0, 89.2, 80.9, 44.2; HRMS (ESI) calcd for  $(\text{M}+\text{H})^+$   $\text{C}_{23}\text{H}_{16}\text{N}_5\text{O}_7\text{S}_2^+$ , 538.0486, found: 538.0482;

### N-(3-(2-bromophenyl)prop-2-yn-1-yl)-N-(4-(2-hydroxy-5-nitrophenyl)-

### 1,2,3-thiadiazol-5-yl)-3-nitrobenzenesulfonamide (2k)

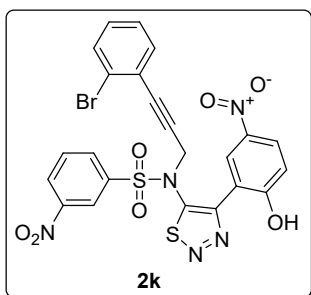

The title compound **2k** was purified by flash chromatography in PE/EA = 4/1-2/1 as yellow oil (96 mg, 78% yield);  $^1\text{H NMR}$  (500 MHz, Dimethyl Sulfoxide- $d_6$ )  $\delta$  7.95 (d,  $J$  = 10.0 Hz, 1H), 7.72 (d,  $J$  = 10.0 Hz, 1H), 7.68 – 7.66 (m, 2H), 7.63 (t,  $J$  = 5.0 Hz, 1H), 7.54 (t,  $J$  = 5.0 Hz, 1H), 7.28 – 7.25 (m, 5H), 6.88 (d,  $J$  = 10.0 Hz, 1H), 4.73 (s, 2H);  $^{13}\text{C NMR}$  (126 MHz, Dimethyl Sulfoxide- $d_6$ )  $\delta$  163.0, 162.8, 154.7, 151.2, 148.1, 144.9, 139.4, 138.5, 134.4, 133.8, 132.9, 131.9, 131.2, 130.7, 130.0, 129.1, 128.8, 128.6, 127.8, 127.5, 126.4, 123.2, 123.0, 122.1, 117.8, 117.1, 116.7, 115.9, 86.3, 84.6, 43.1; HRMS (ESI) calcd for  $(\text{M}+\text{H})^+$   $\text{C}_{23}\text{H}_{15}\text{BrN}_5\text{O}_7\text{S}_2^+$ , 615.9591, found: 615.9594;

### N-(3-(3-bromophenyl)prop-2-yn-1-yl)-N-(4-(2-hydroxy-5-nitrophenyl)-1,2,3-thiadiazol-5-yl)-3-nitrobenzenesulfonamide (**2l**)

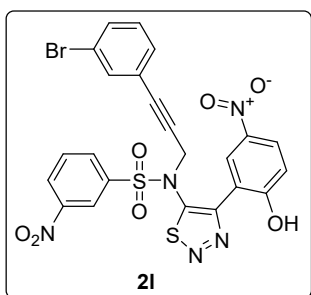

The title compound **2l** was purified by flash chromatography in PE/EA = 4/1-2/1 as yellow solid (93 mg, 76% yield), m.p. = 187–188 °C;  $^1\text{H NMR}$  (500 MHz, Dimethyl Sulfoxide- $d_6$ )  $\delta$  11.82 (s, 1H), 8.11 (dd,  $J$  = 9.1, 2.9 Hz, 1H), 7.95 (dd,  $J$  = 7.8, 1.3 Hz, 1H), 7.90 (d,  $J$  = 2.9 Hz, 1H), 7.87 (td,  $J$  = 8.0, 1.3 Hz, 2H), 7.81 – 7.76 (m, 2H), 7.73 – 7.63 (m, 3H), 7.04 (d,  $J$  = 9.1 Hz, 1H), 5.03 (s, 2H);  $^{13}\text{C NMR}$  (126 MHz, Dimethyl Sulfoxide- $d_6$ )  $\delta$  166.9, 159.4, 155.4, 152.1, 144.3, 141.3, 138.7, 138.2, 138.1, 136.6, 135.4, 133.9, 132.4, 132.2, 130.1, 129.2, 122.3, 121.9, 121.5, 119.1, 94.1, 88.5, 47.6; HRMS (ESI) calcd for  $(\text{M}+\text{H})^+$   $\text{C}_{23}\text{H}_{15}\text{BrN}_5\text{O}_7\text{S}_2^+$ , 615.9591, found: 615.9592;

### N-(3-(4-chlorophenyl)prop-2-yn-1-yl)-N-(4-(2-hydroxy-5-nitrophenyl)-1,2,3-thiadiazol-5-yl)-3-nitrobenzenesulfonamide (**2m**)

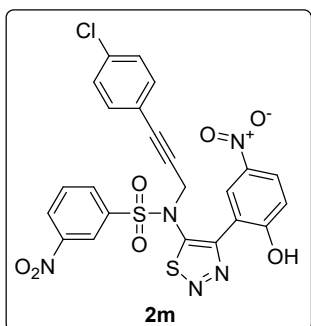

The title compound **2m** was purified by flash chromatography in PE/EA = 4/1-2/1 as yellow solid (90 mg, 79% yield), m.p. = 162–165 °C;  $^1\text{H NMR}$  (500 MHz, Dimethyl Sulfoxide- $d_6$ )  $\delta$  10.05 (s, 1H), 8.12 (dd,  $J$  = 9.1, 2.9 Hz, 1H), 7.89 (d,  $J$  = 2.9 Hz, 1H), 7.85 (td,  $J$  = 7.9, 1.3 Hz, 2H), 7.79 (td,  $J$  = 7.7, 1.4 Hz, 1H), 7.71 (td,  $J$  = 7.7, 1.3 Hz, 1H), 7.49 – 7.39 (m, 5H), 7.04 (d,  $J$  = 9.1 Hz, 1H), 4.92 (s, 2H);  $^{13}\text{C NMR}$  (126 MHz, Dimethyl Sulfoxide- $d_6$ )  $\delta$  162.4, 154.8, 150.6, 147.4, 139.4, 136.5, 133.2, 131.9, 131.9, 129.9, 129.3, 129.1, 127.6, 127.4, 125.2, 121.3, 117.3, 116.8, 88.0, 83.4, 42.9; HRMS (ESI) calcd for  $(\text{M}+\text{H})^+$   $\text{C}_{23}\text{H}_{15}\text{ClN}_5\text{O}_7\text{S}_2^+$ , 572.0096, found: 572.0097;

**N-(3-(4-fluorophenyl)prop-2-yn-1-yl)-N-(4-(2-hydroxy-5-nitrophenyl)-1,2,3-thiadiazol-5-yl)-3-nitrobenzenesulfonamide (2n)**

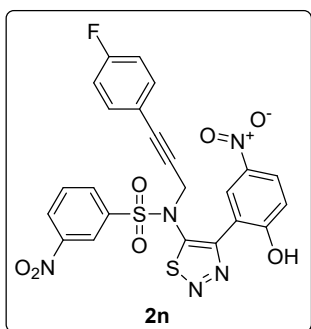

The title compound **2n** was purified by flash chromatography in PE/EA = 4/1-2/1 as yellow oil (91 mg, 82% yield);  $^1\text{H NMR}$  (500 MHz, Dimethyl Sulfoxide- $d_6$ )  $\delta$  11.70 (s, 1H), 8.43 (d,  $J = 10.0$  Hz, 1H), 8.35 (d,  $J = 5.0$  Hz, 1H), 8.21 (s, 1H), 8.19 (d,  $J = 10.0$  Hz, 1H), 8.10 (d,  $J = 10.0$  Hz, 1H), 8.04 (d,  $J = 5.0$  Hz, 1H), 7.80 (t,  $J = 5.0$  Hz, 1H), 7.58 (d,  $J = 5.0$  Hz, 1H), 7.39 – 7.35 (m, 3H), 7.26 (t,  $J = 10.0$  Hz, 2H), 7.08 (d,  $J = 10.0$  Hz, 1H), 6.91 (d,  $J = 10.0$  Hz, 1H), 4.97 (s, 2H);  $^{13}\text{C NMR}$  (126 MHz, Dimethyl Sulfoxide- $d_6$ )  $\delta$  163.8, 162.9, 162.2, 161.8, 161.4, 154.6, 151.3, 148.0, 144.9, 139.8, 139.5, 138.4, 136.1, 134.4, 134.1, 134.0, 131.9, 130.5, 130.0, 129.2, 128.8, 128.6, 128.0, 127.7, 127.5, 126.4, 123.0, 117.8, 117.5, 117.0, 116.7, 116.6, 116.4, 115.9, 87.1, 82.9, 43.2; HRMS (ESI) calcd for  $(\text{M}+\text{H})^+$   $\text{C}_{23}\text{H}_{15}\text{FN}_5\text{O}_7\text{S}_2^+$ , 556.0391, found: 556.0390;

**ethyl 4-(3-((N-(4-(2-hydroxy-5-nitrophenyl)-1,2,3-thiadiazol-5-yl)-3-nitrophenyl)sulfonamido)prop-1-yn-1-yl)benzoate (2o)**

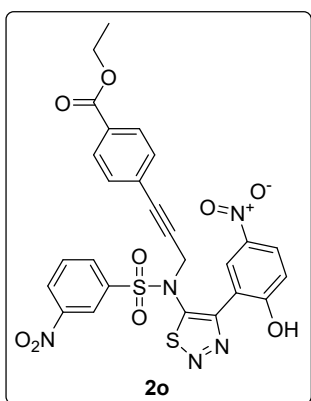

The title compound **2o** was purified by flash chromatography in PE/EA = 3/1-1/1 as yellow solid (91 mg, 75% yield), m.p. = 176–178 °C;  $^1\text{H NMR}$  (500 MHz, Dimethyl Sulfoxide- $d_6$ )  $\delta$  11.80 (s, 1H), 8.13 (dd,  $J = 10.0, 5.0$  Hz, 1H), 8.00 (d,  $J = 5.0$  Hz, 2H), 7.91 (d,  $J = 5.0$  Hz, 1H), 7.89 – 7.85 (m, 2H), 7.82 (t,  $J = 5.0$  Hz, 1H), 7.73 – 7.69 (m, 3H), 7.58 (d,  $J = 5.0$  Hz, 2H), 7.41 (d,  $J = 10.0$  Hz, 1H), 7.06 (d,  $J = 10.0$  Hz, 1H), 4.95 (s, 2H);  $^{13}\text{C NMR}$  (126 MHz, Dimethyl Sulfoxide- $d_6$ )  $\delta$  165.4, 162.2, 154.7, 150.7, 147.4, 139.5, 136.7, 133.2, 132.2, 131.9, 130.7, 129.9, 129.0, 127.6, 127.5, 125.9, 125.2, 117.2, 116.8, 86.9, 86.5, 61.5, 42.9, 14.5; HRMS (ESI) calcd for  $(\text{M}+\text{H})^+$   $\text{C}_{23}\text{H}_{15}\text{ClN}_5\text{O}_7\text{S}_2^+$ , 610.0697, found: 610.0699;



## 4. Crystal Structure of 2d and 2j

Method for single crystals cultivation: The single crystal for compound 2a and 2j were prepared from a mixture solvent of Dichloromethane/ Ethyl acetate and Petroleum ether (v/v = 1:1). a pure solid sample (10–20 mg) was dissolved in dichloromethane/ethyl acetate (2 mL) in a vial at room temperature, and petroleum ether/hexane (2-3 mL) was added into the above solution slowly while keeping the sample completely dissolved. The vial was properly sealed with parafilm and kept at room temperature to allow the slow evaporation of the solvents until a single crystal was obtained.

The data were collected on a Agilent Gemini E diffractometer (Mo, 50kV 40mA) instrument using Mo-K $\alpha$  radiation ( $\lambda = 0.71073 \text{ \AA}$ ) at 296 K and reduced by CrysAlisPro (Rigaku). The crystal structures were solved and refined using the SHELXTL software package. Refinements were performed with SHELXL-2013 using fullmatrix least-squares calculations on F<sup>2</sup>, with anisotropic displacement parameters for all the nonhydrogen atoms. The crystallographic data have already been deposited at the Cambridge Crystallographic Data Centre.

Crystallographic data for compound **2d** (CCDC-2085419) has been deposited with the Cambridge Crystallographic Data Centre. Copies of the data can be obtained, free of charge, on application to CCDC (Email:deposit@ccdc.cam.ac.uk). Thermal ellipsoids are drawn at 50% probability level.

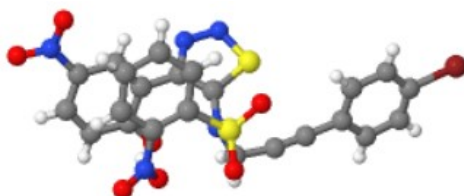

|                        |                                                                                 |                                                                                 |
|------------------------|---------------------------------------------------------------------------------|---------------------------------------------------------------------------------|
| Bond precision:        | C-C = 0.0076 Å                                                                  | Wavelength=1.54178                                                              |
| Cell:                  | a=23.7139(19)    b=7.3466(6)    c=14.3578(11)                                   | alpha=90    beta=92.434(4)    gamma=90                                          |
| Temperature:           | 298 K                                                                           |                                                                                 |
|                        | Calculated                                                                      | Reported                                                                        |
| Volume                 | 2499.1(3)                                                                       | 2499.1(3)                                                                       |
| Space group            | P 21/c                                                                          | P 1 21/c 1                                                                      |
| Hall group             | -P 2ybc                                                                         | -P 2ybc                                                                         |
| Moiety formula         | C <sub>23</sub> H <sub>14</sub> Br N <sub>5</sub> O <sub>7</sub> S <sub>2</sub> | C <sub>23</sub> H <sub>14</sub> Br N <sub>5</sub> O <sub>7</sub> S <sub>2</sub> |
| Sum formula            | C <sub>23</sub> H <sub>14</sub> Br N <sub>5</sub> O <sub>7</sub> S <sub>2</sub> | C <sub>23</sub> H <sub>14</sub> Br N <sub>5</sub> O <sub>7</sub> S <sub>2</sub> |
| Mr                     | 616.41                                                                          | 616.42                                                                          |
| Dx, g cm <sup>-3</sup> | 1.638                                                                           | 1.638                                                                           |
| Z                      | 4                                                                               | 4                                                                               |
| Mu (mm <sup>-1</sup> ) | 4.291                                                                           | 4.291                                                                           |
| F <sub>000</sub>       | 1240.0                                                                          | 1240.0                                                                          |
| F <sub>000</sub> '     | 1243.45                                                                         |                                                                                 |

|                                                               |             |             |
|---------------------------------------------------------------|-------------|-------------|
| h,k,lmax                                                      | 28,8,17     | 28,8,17     |
| Nref                                                          | 4602        | 4581        |
| Tmin,Tmax                                                     | 0.411,0.709 | 0.546,0.753 |
| Tmin'                                                         | 0.310       |             |
| Correction method= # Reported T Limits: Tmin=0.546 Tmax=0.753 |             |             |
| AbsCorr = MULTI-SCAN                                          |             |             |

|                               |                                 |
|-------------------------------|---------------------------------|
| Data completeness= 0.995      | Theta(max)= 68.607              |
| R(reflections)= 0.0681( 4228) | wR2(reflections)= 0.1682( 4581) |
| S = 1.148                     | Npar= 344                       |

Crystallographic data for compound **2j** (CCDC-1963640) has been deposited with the Cambridge Crystallographic Data Centre, Copies of the data can be obtained, free of charge, on application to CCDC (Email:deposit@ccdc.cam.ac.uk). Thermal ellipsoids are drawn at 50% probability level.

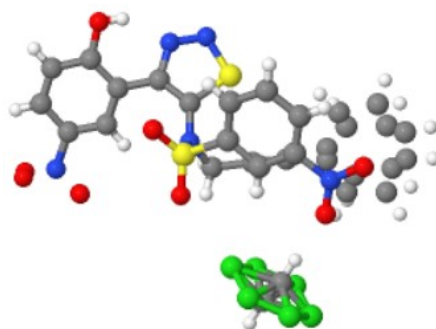

|                 |                                                      |                    |
|-----------------|------------------------------------------------------|--------------------|
| Bond precision: | C-C = 0.0041 Å                                       | Wavelength=0.71073 |
| Cell:           | a=10.6408(8)    b=10.8920(7)    c=12.6948(11)        |                    |
|                 | alpha=71.578(7)    beta=68.187(7)    gamma=89.832(5) |                    |
| Temperature:    | 300 K                                                |                    |

|                        | Calculated                                                                                            | Reported                                                                                                 |
|------------------------|-------------------------------------------------------------------------------------------------------|----------------------------------------------------------------------------------------------------------|
| Volume                 | 1284.78(19)                                                                                           | 1284.78(18)                                                                                              |
| Space group            | P -1                                                                                                  | P -1                                                                                                     |
| Hall group             | -P 1                                                                                                  | -P 1                                                                                                     |
| Moiety formula         | 2(C <sub>23</sub> H <sub>15</sub> N <sub>5</sub> O <sub>7</sub> S <sub>2</sub> ), C H Cl <sub>3</sub> | 0.5 (C H Cl <sub>3</sub> ), C <sub>23</sub> H <sub>15</sub> N <sub>5</sub> O <sub>7</sub> S <sub>2</sub> |
| Sum formula            | C <sub>47</sub> H <sub>31</sub> Cl <sub>3</sub> N <sub>10</sub> O <sub>14</sub> S <sub>4</sub>        | C <sub>23.50</sub> H <sub>15.50</sub> N <sub>5</sub> O <sub>7</sub> S <sub>2</sub>                       |
| Mr                     | 1194.41                                                                                               | 597.20                                                                                                   |
| Dx,g cm <sup>-3</sup>  | 1.544                                                                                                 | 1.544                                                                                                    |
| Z                      | 1                                                                                                     | 2                                                                                                        |
| Mu (mm <sup>-1</sup> ) | 0.418                                                                                                 | 0.418                                                                                                    |
| F000                   | 610.0                                                                                                 | 610.0                                                                                                    |
| F000'                  | 611.21                                                                                                |                                                                                                          |
| h,k,lmax               | 14,15,17                                                                                              | 14,14,16                                                                                                 |
| Nref                   | 7098                                                                                                  | 5744                                                                                                     |
| Tmin,Tmax              | 0.951,0.959                                                                                           | 0.765,1.000                                                                                              |
| Tmin'                  | 0.951                                                                                                 |                                                                                                          |



Correction method= # Reported T Limits: Tmin=0.765 Tmax=1.000  
AbsCorr = MULTI-SCAN

Data completeness= 0.809                      Theta(max)= 29.439  
R(reflections)= 0.0597( 4023)                      wR2(reflections)= 0.2062( 3280)  
S = 1.050                      Npar= 421

## 5. References

- [1] a) Jepsen, T. H.; Glibstrup, E.; Crestey, F.; Jensen, A. A.; and Kristensen J. L. A strategic approach to [6,6]-bicyclic lactones: application towards the CD fragment of Dh $\beta$ E. *Beilstein J. Org. Chem.*, **2017**, *13*, 988–994; b) Gao, M.; Gao, Q. Q.; Hao, X. B.; Wu, Y.; Zhang, Q. M.; Liu, G. H.; and Liu. R. Ruthenium Carbene-Mediated Construction of Strained Allenes via the Enyne Cross-Metathesis/Cyclopropanation of 1,6-Enynes. *Org. Lett.*, **2020**, *22*, 1139–1143; c) Sui, X. L.; Zhang, T. Q.; Pabarue, A. B.; Fu, L. B. and Gutekunst W. R. Alternating Cascade Metathesis Polymerization of Enynes and Cyclic Enol Ethers with Active Ruthenium Fischer Carbenes. *J. Am. Chem. Soc.*, **2020**, *142*, 12942–12947; d) Kaushik, C. P.; Pahwa, A.; Kumar, A.; Singh, D. & Kumar, K. Facile synthesis, characterization, and antimicrobial studies of some disubstituted 1,2,3-triazoles with sulfonamide functionality. *Synthetic Communications*, **2017**, *47*:16, 1485–1494
- [2] a) Nayak, S.; Ghosh, N.; Prabagar, B. and Sahoo, A. K. *p*-TsOH Promoted Au(I)-Catalyzed Consecutive Endo Cyclization of Yne-Tethered Ynamide: Access to Benzofused Dihydroisoquinolones. *Org. Lett.*, **2015**, *17*, 22, 5662–5665; b) Nishimura, T.; Maeda, Y. and Hayashi T. Chiral Diene-Phosphine Tridentate Ligands for Rhodium-Catalyzed Asymmetric Cycloisomerization of 1,6-Enynes. *Org. Lett.*, **2011**, *13*, 14, 3674–3677
- [3] a) Li, X.; Mai, S. Y.; Li, X.; Xu, J.; Xu, H.T. and Song, Q. L. Cu-Catalyzed *o*-Amino Benzofuranthioether Formation from *N*-Tosylhydrazone-Bearing Thiocarbamates and Arylative Electrophiles. *Org. Lett.*, **2020**, *22*, 7874–7878; b) W. D. Li, Y. W. Zhao, S. Y. Mai and Q. L. Song. Thiocarbamate-Directed Tandem Olefination–Intramolecular Sulfuration of Two *Ortho* C–H Bonds: Application to Synthesis of a COX-2 Inhibitor. *Org. Lett.*, **2018**, *20*, 1162–1166; c) S. Y. Mai and Q. L. Song, Divergent Synthesis of Disulfanes and Benzenesulfonothioates Bearing 2-Aminofurans From *N*-Tosylhydrazone-Bearing Thiocarbamates. *Angew. Chem. Int. Ed.*, **2017**, *56*, 7952–7957.
- [4] a) Wang, Y.; Lin, J. B.; Xie, J. K.; Lu, H.; Hu, X. Q. and Xu, P. F. Dearomative Dienolate-Mediated Catalysis: A Remote Activation Strategy for Asymmetric Functionalization of Benzylic C-H Bonds of Heteroaryl Aldehydes. *Org. Lett.*, **2018**, *20*, 18, 5835–5839; b) Yu, Y. H.; Chakraborty, P.; Song, J. S.; Zhu, L.; Li C. S. and Huang, X. L. Easy access to medium-sized lactones through metal carbene migratory insertion enabled 1,4-palladium shift. *Nat. Commun.*, **2020**, *11*, 461; c) Kurma, S. H.; Sridhar, B. and Bhimapaka, C. R. Direct Access for the Regio- and Stereoselective Synthesis of *N*-Alkenylpyrazoles and Chromenopyrazoles. *J. Org. Chem.*, **2021**, *86*, 3, 2271–2282.

## 6. NMR Spectra of substrate 1 and product

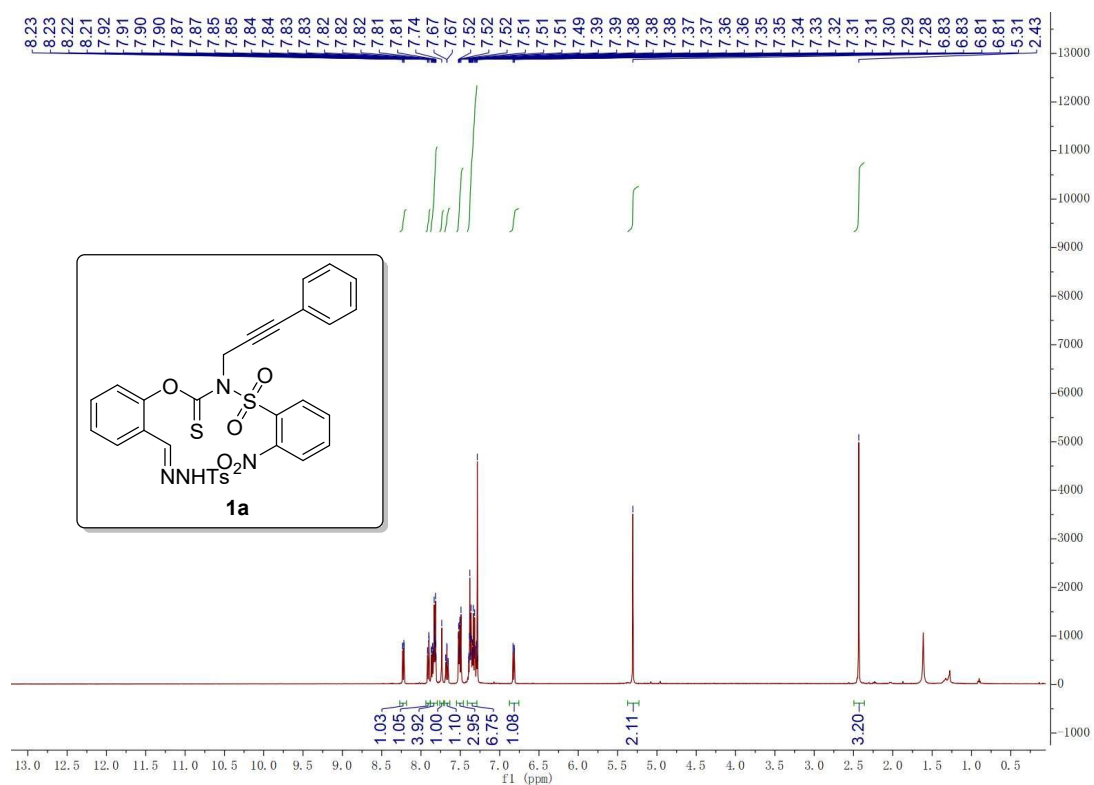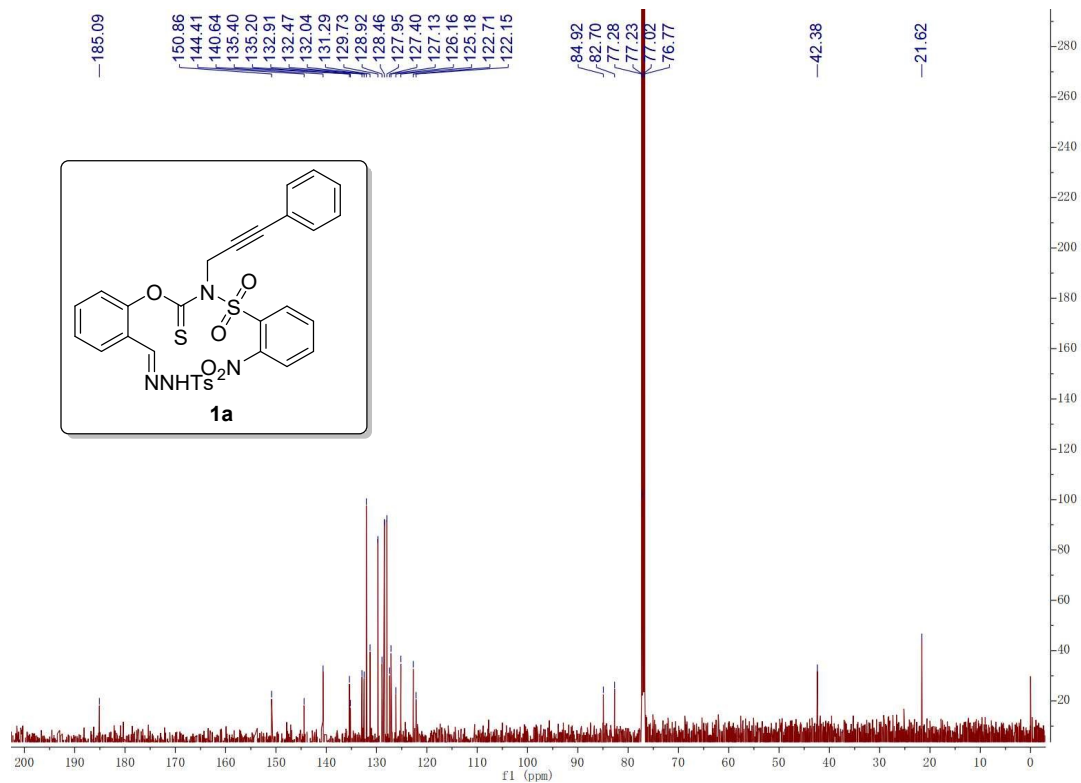

**(E)-O-(4-nitro-2-((2-tosylhydrazineylidene)methyl)phenyl) ((2-nitrophenyl)sulfonyl)(3-phenylprop-2-yn-1-yl)carbamothioate (1b)**

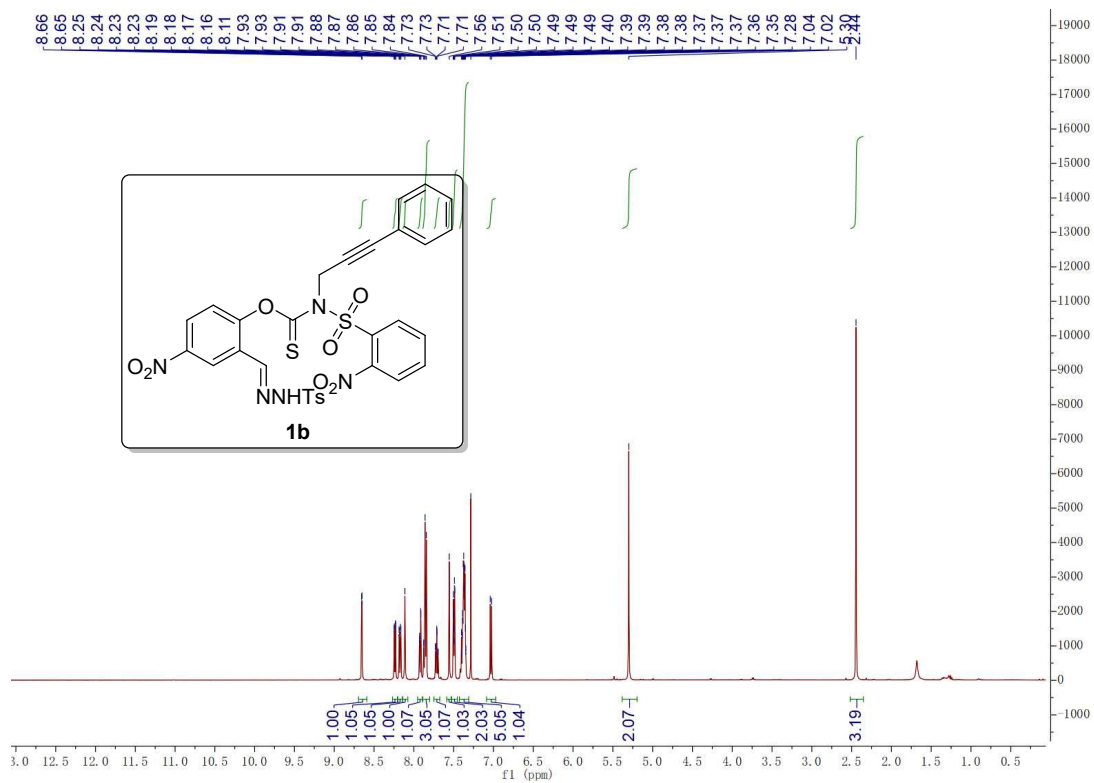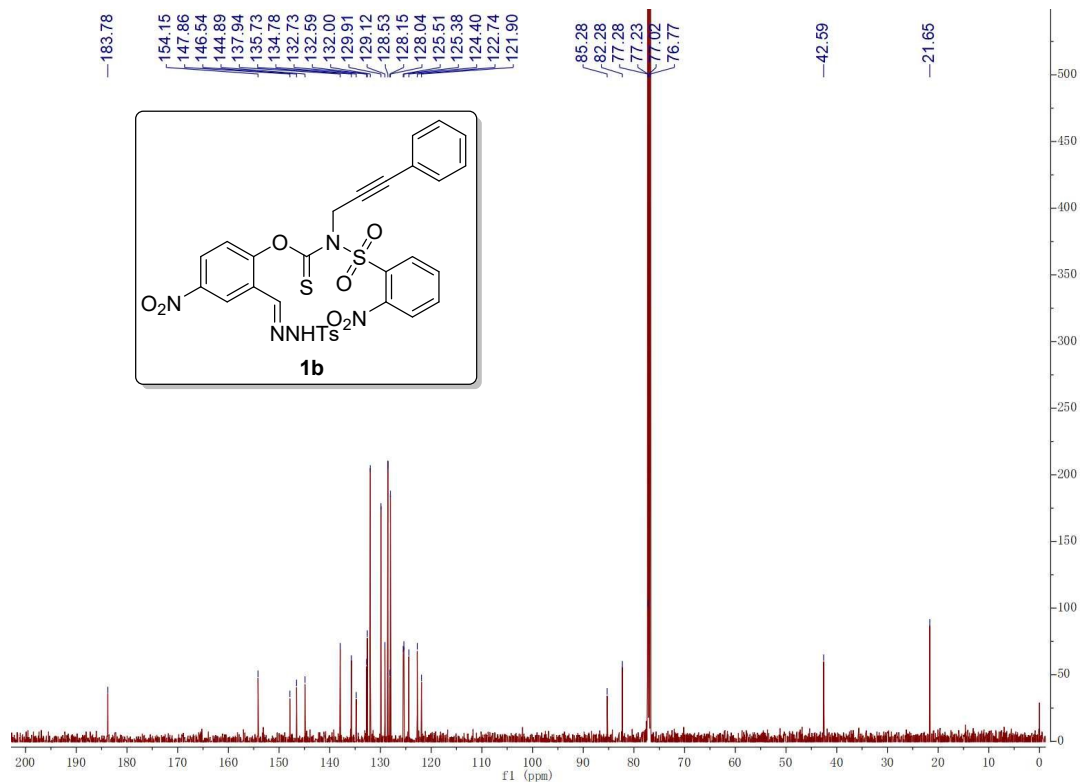

**(E)-O-(4-chloro-2-((2-tosylhydrazineylidene)methyl)phenyl) ((2-nitrophenyl)sulfonyl)(3-phenylprop-2-yn-1-yl)carbamothioate (1c)**

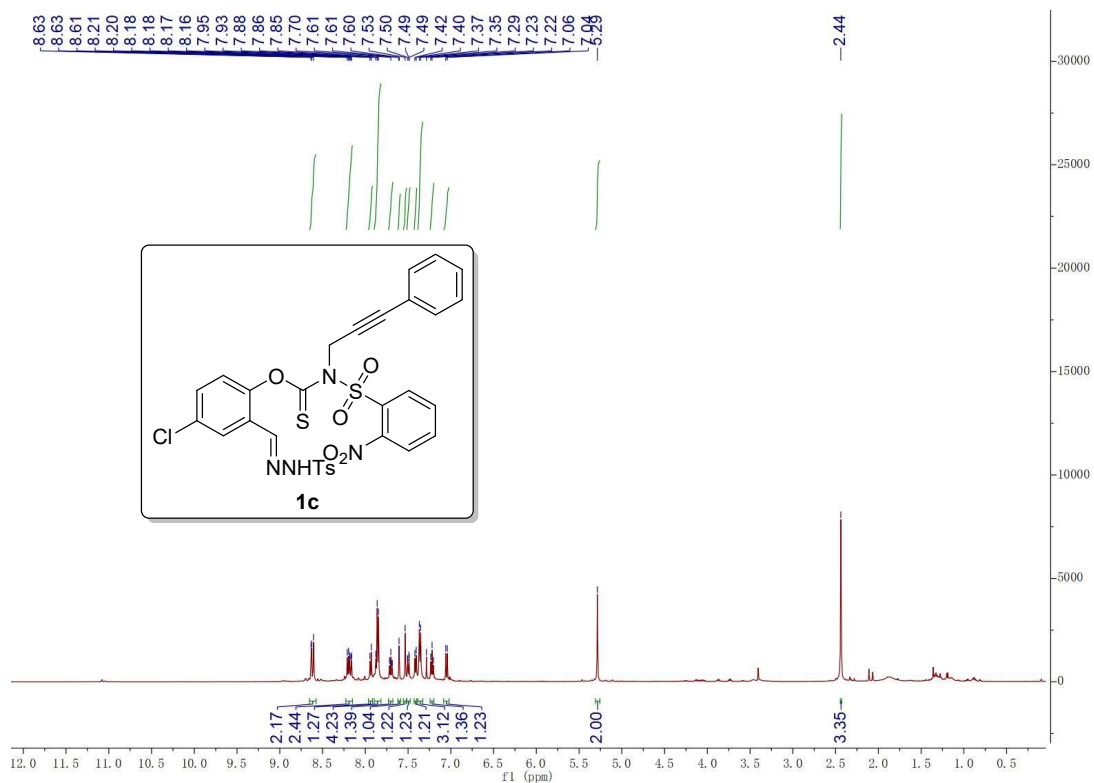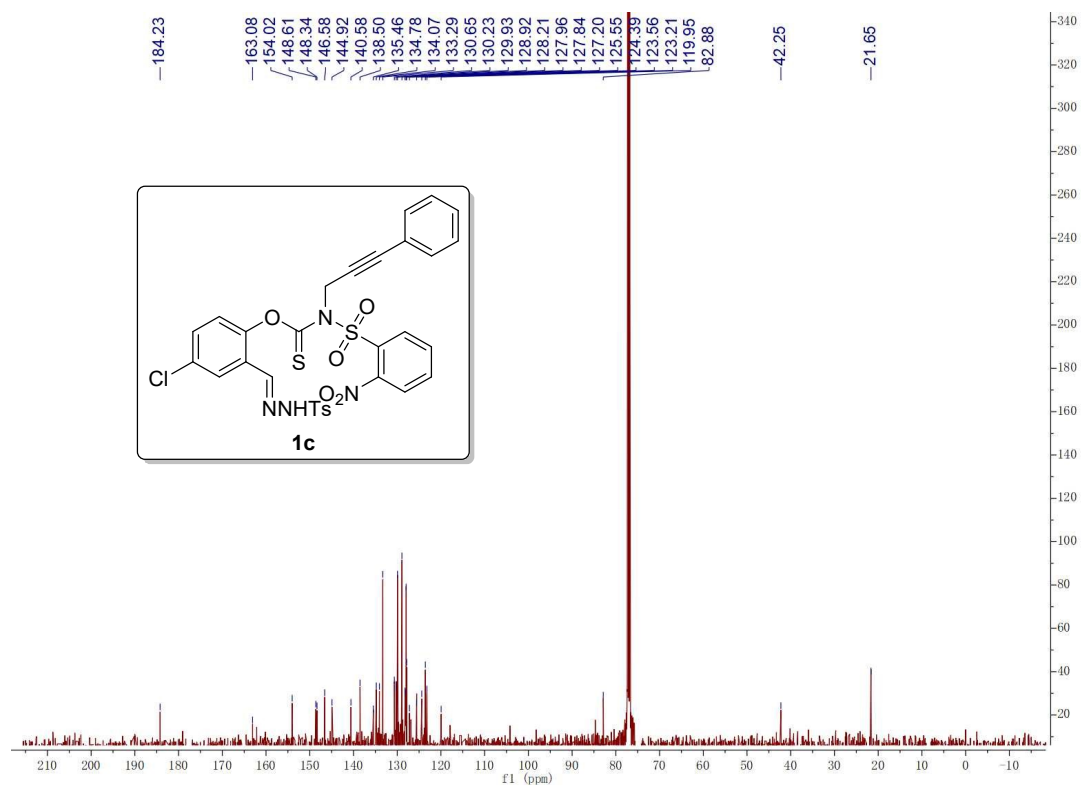

**(E)-O-(4-fluoro-2-((2-tosylhydrazineylidene)methyl)phenyl) ((2-nitrophenyl)sulfonyl)(3-phenylprop-2-yn-1-yl)carbamothioate (1d)**

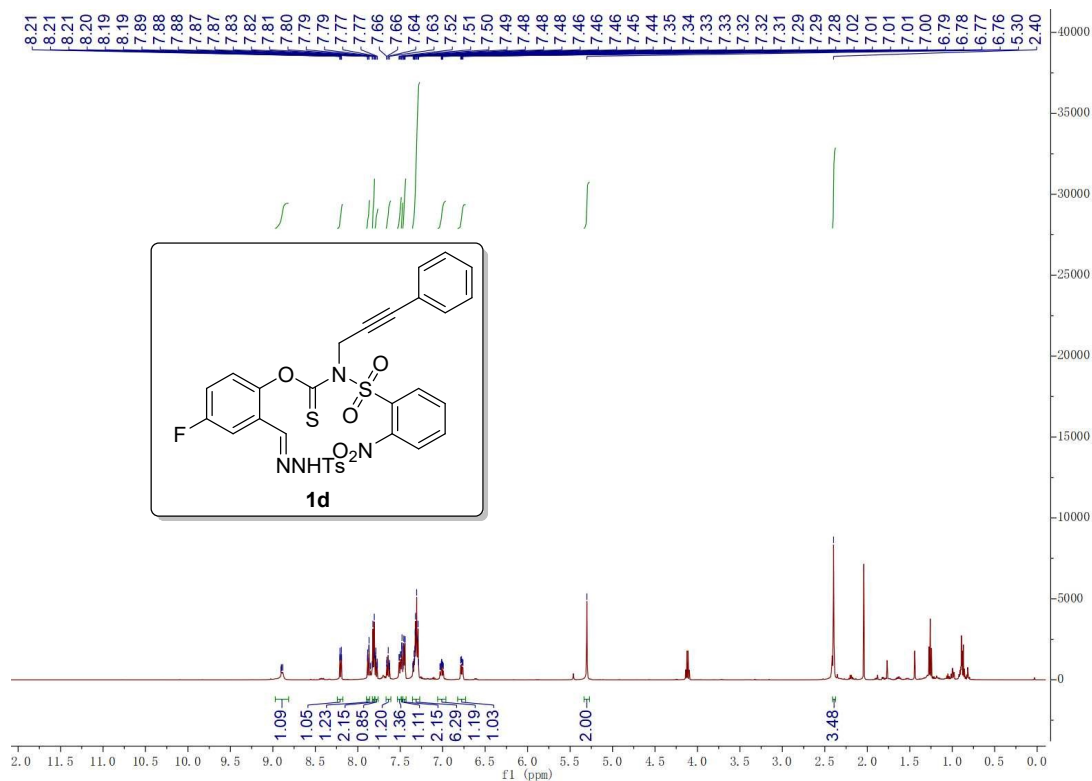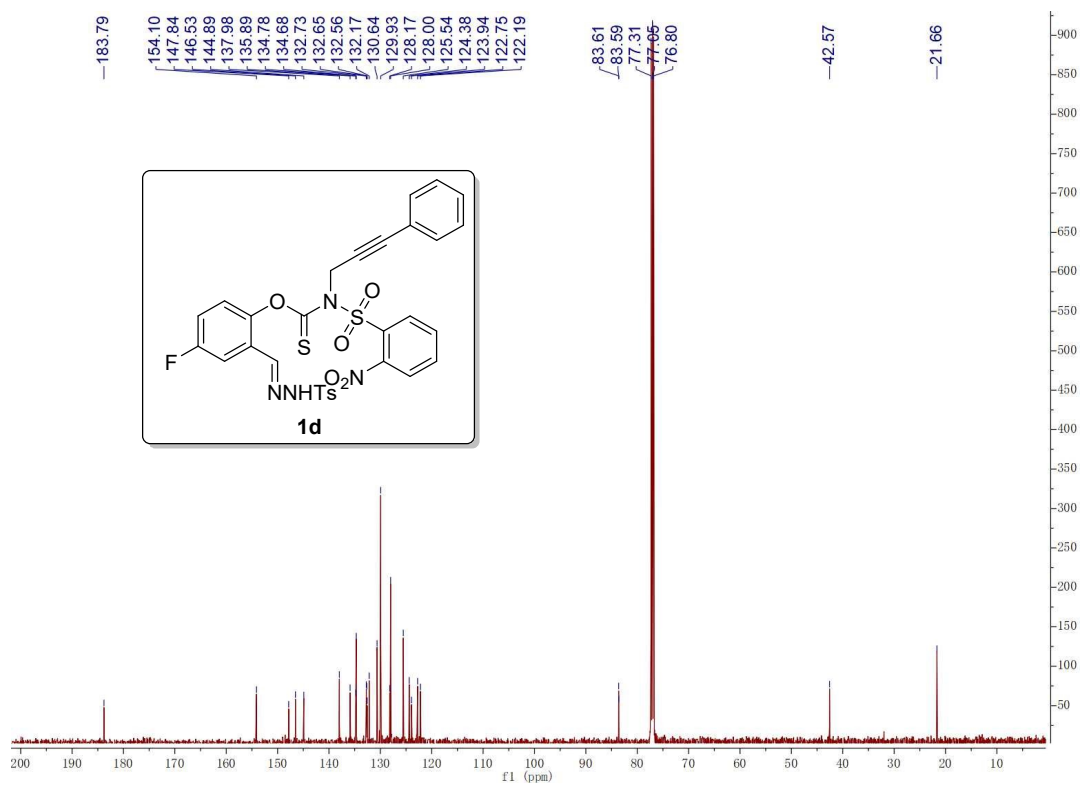

**(E)-O-(4-nitro-2-((2-tosylhydrazineylidene)methyl)phenyl) ((3-nitrophenyl)sulfonyl)(3-phenylprop-2-yn-1-yl)carbamothioate (1e)**

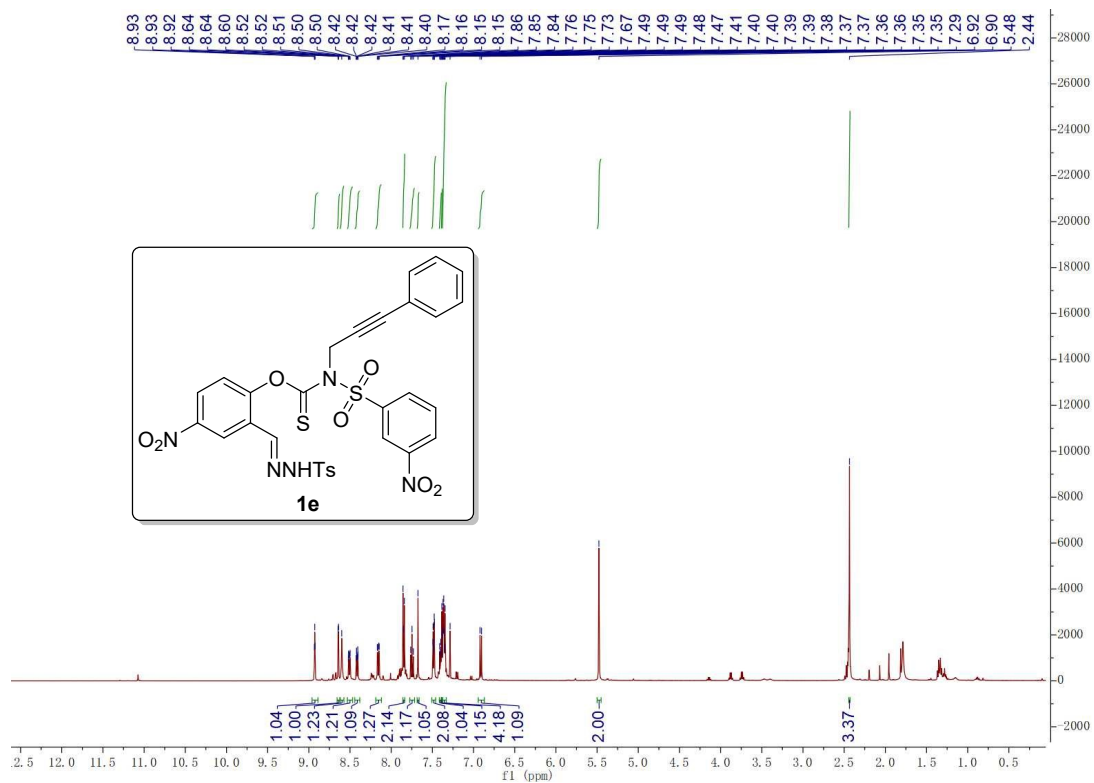

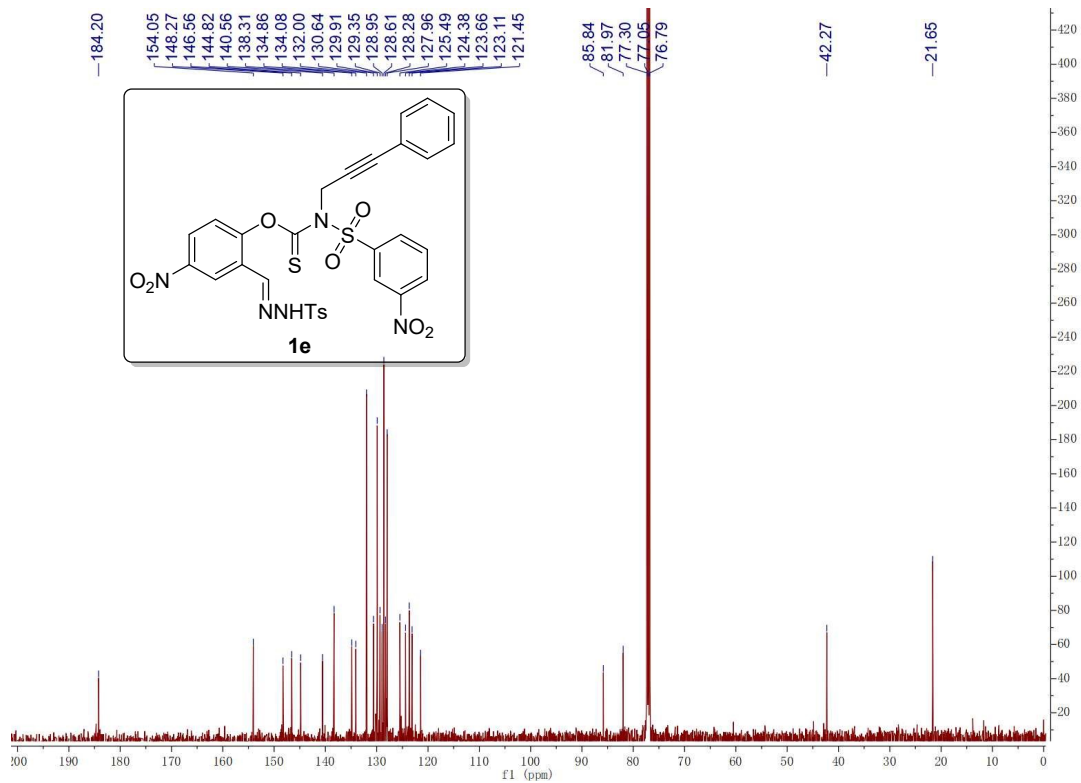

**(E)-O-(4-nitro-2-((2-tosylhydrazineylidene)methyl)phenyl) dimethylcarbamothioate (1f)**

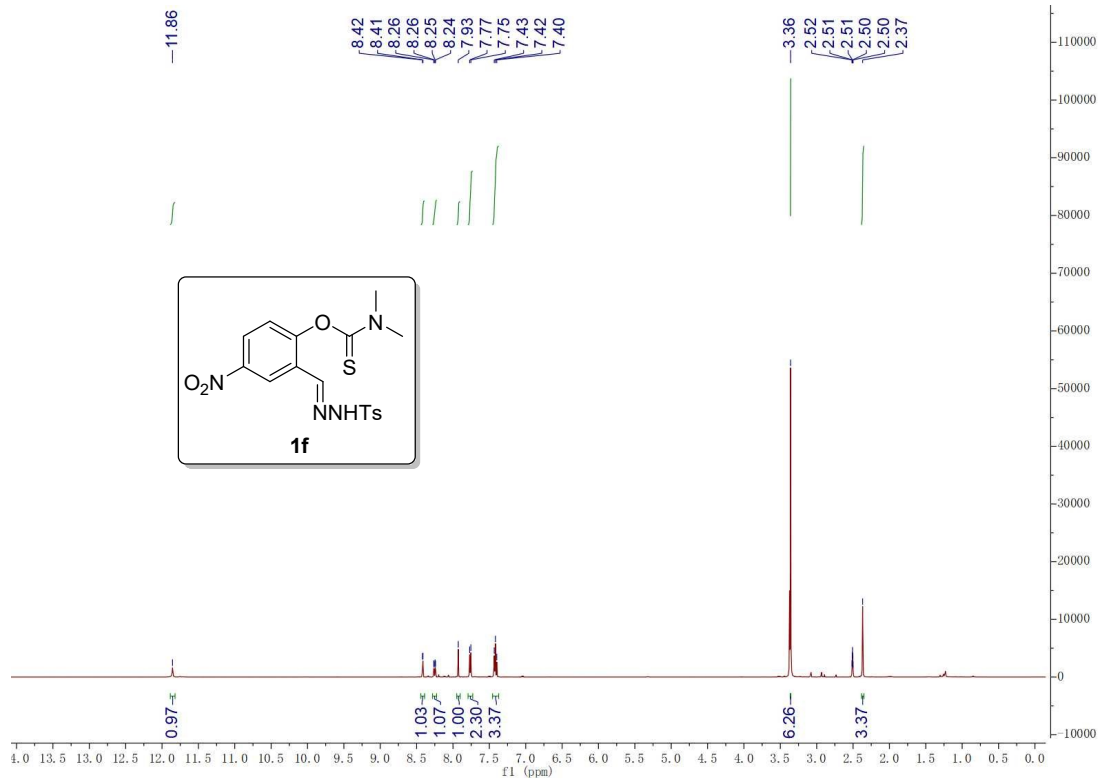



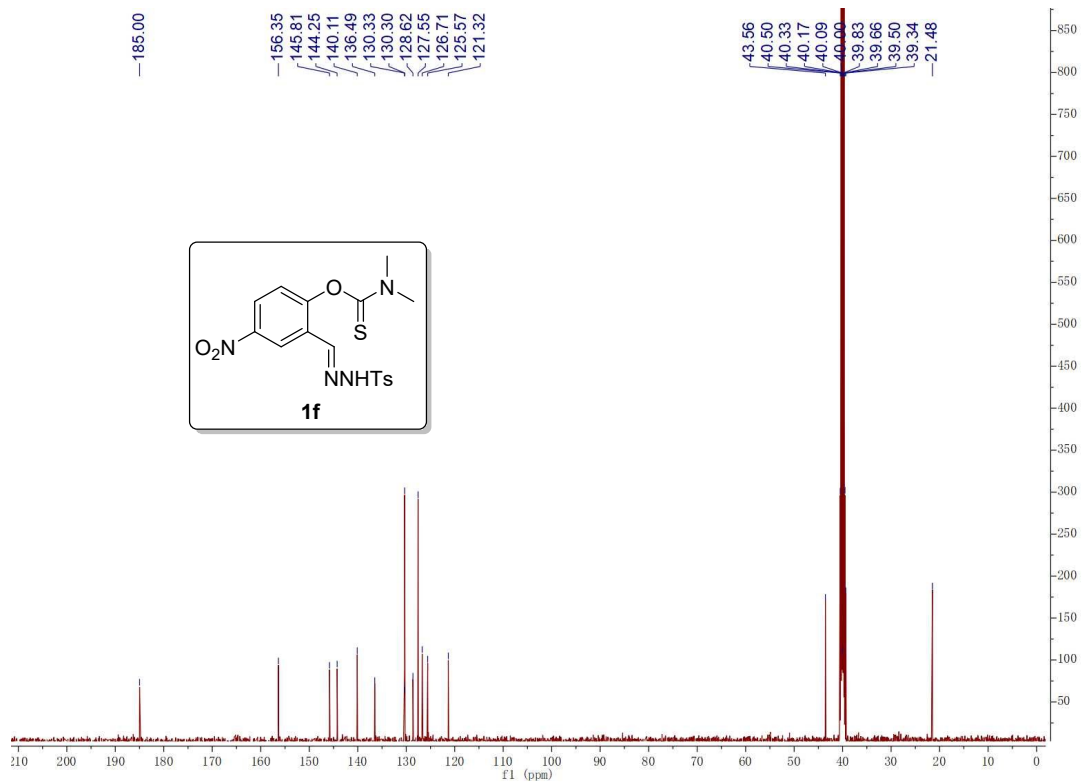

**(E)-O-(4-nitro-2-((2-tosylhydrazineylidene)methyl)phenyl) (3-(4-chlorophenyl)prop-2-yn-1-yl)((2-nitrophenyl)sulfonyl)carbamothioate (1g)**

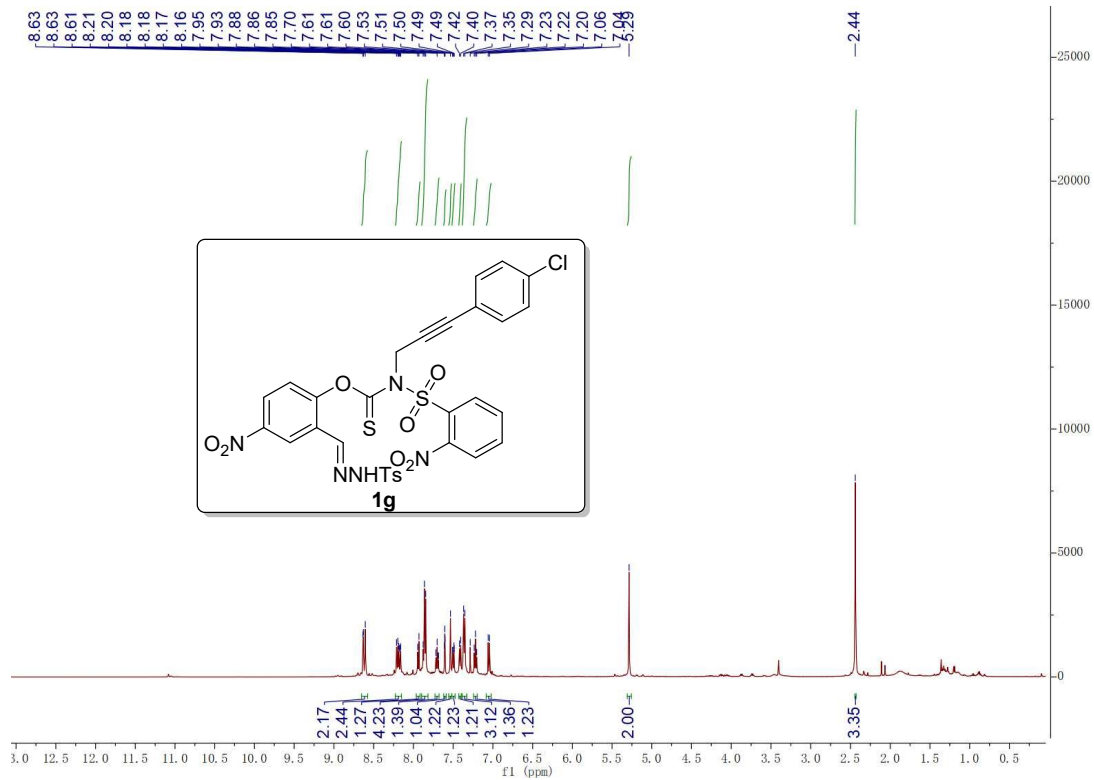

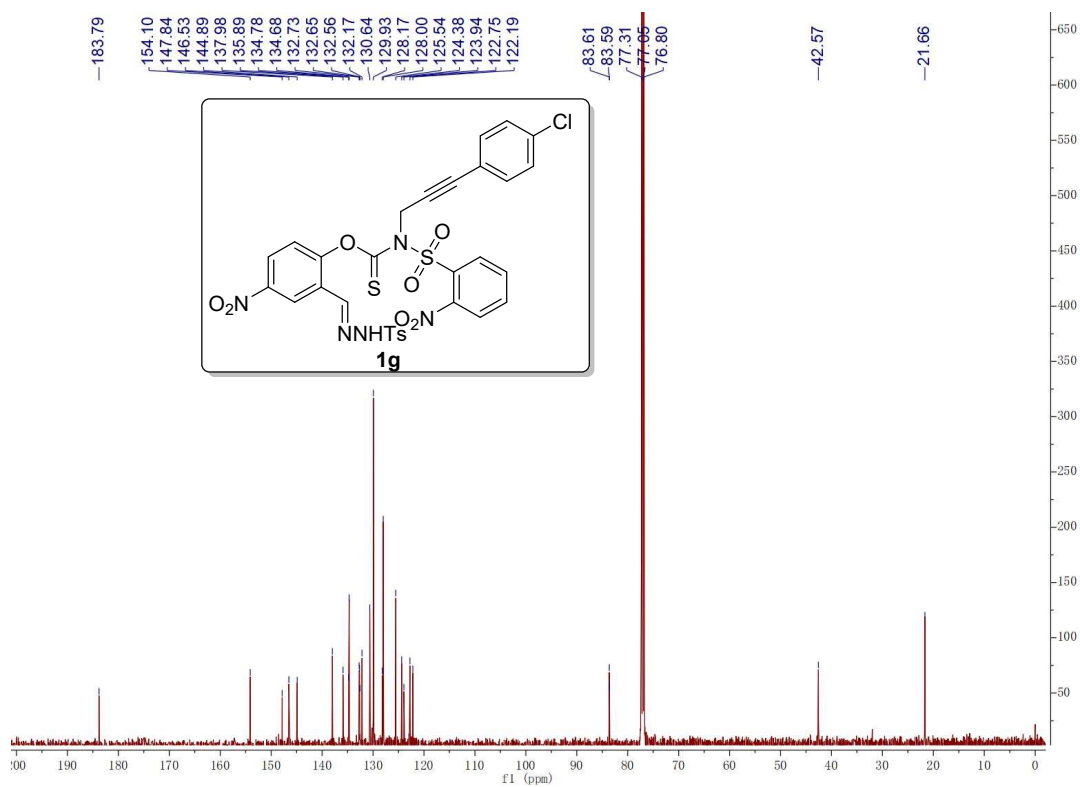

**(E)-O-(4-nitro-2-((2-tosylhydrazineylidene)methyl)phenyl) (3-(4-bromophenyl)prop-2-yn-1-yl)((2-nitrophenyl)sulfonyl)carbamothioate (1h)**

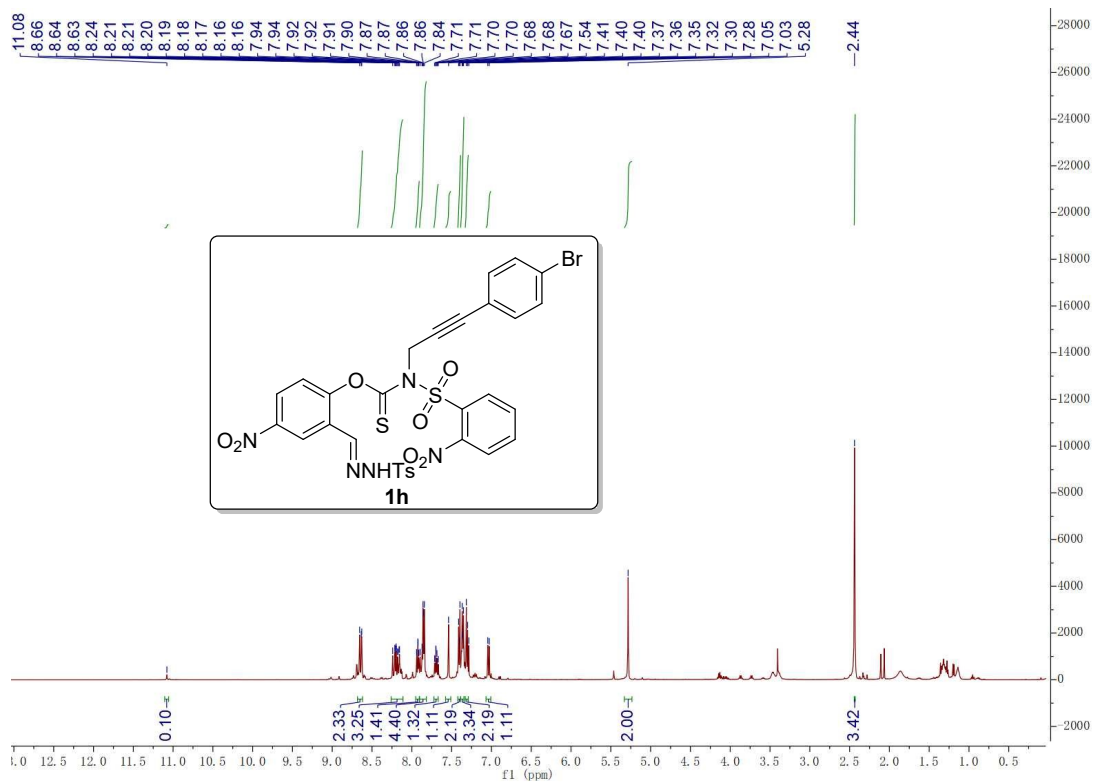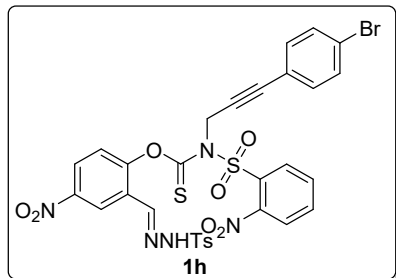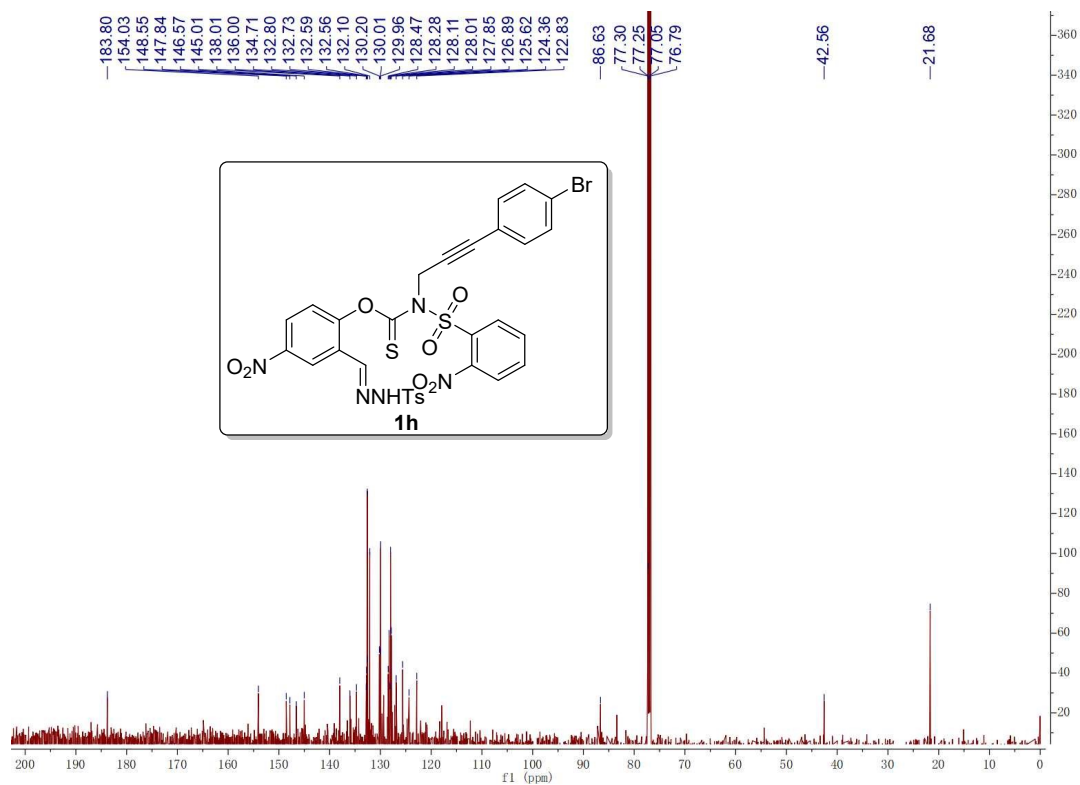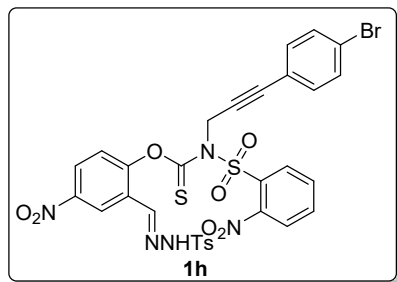

**(E)-O-(4-nitro-2-((2-tosylhydrazineylidene)methyl)phenyl) (3-(3-bromophenyl)prop-2-yn-1-**

yl)((2-nitrophenyl)sulfonyl)carbamothioate (1i)

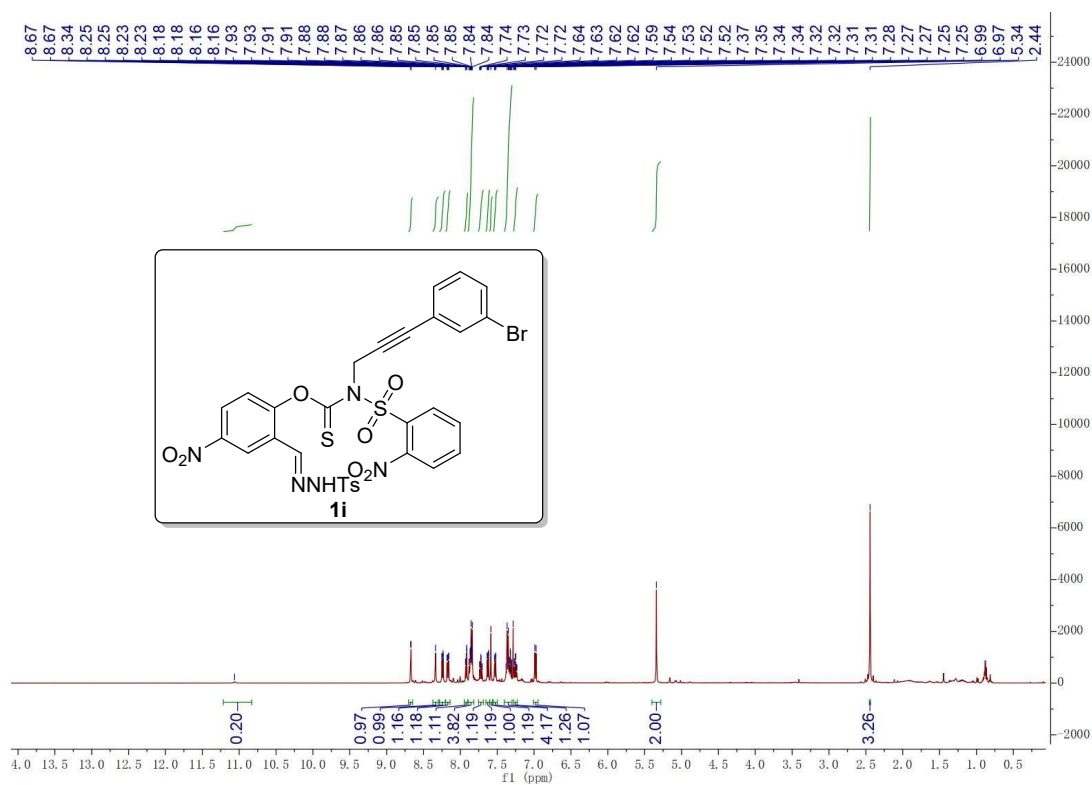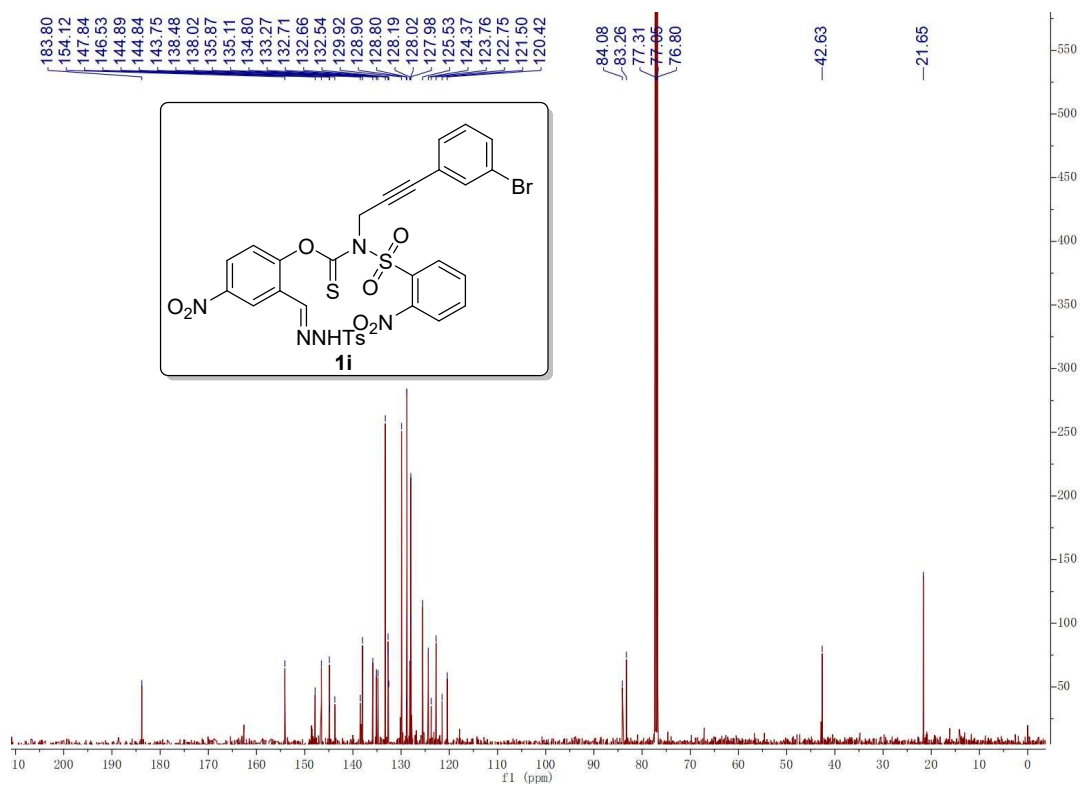

**(E)-O-(4-nitro-2-((2-tosylhydrazineylidene)methyl)phenyl) (3-(2-bromophenyl)prop-2-yn-1-yl)((2-nitrophenyl)sulfonyl)carbamothioate (**1j**)**

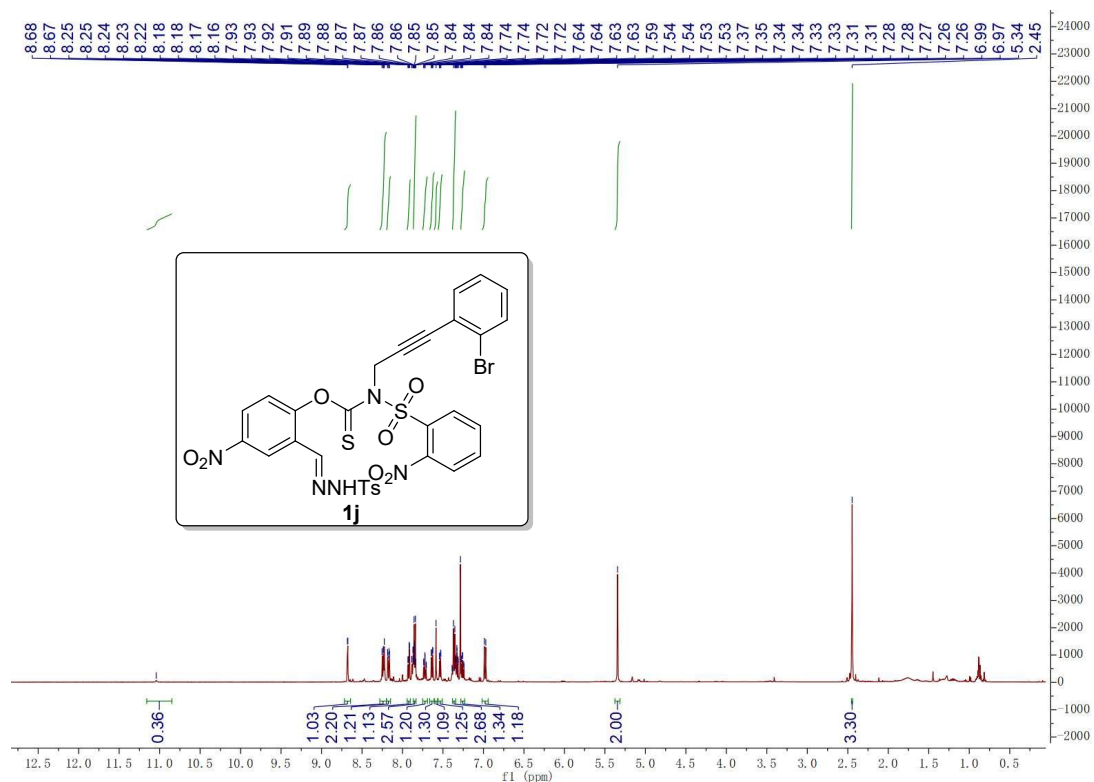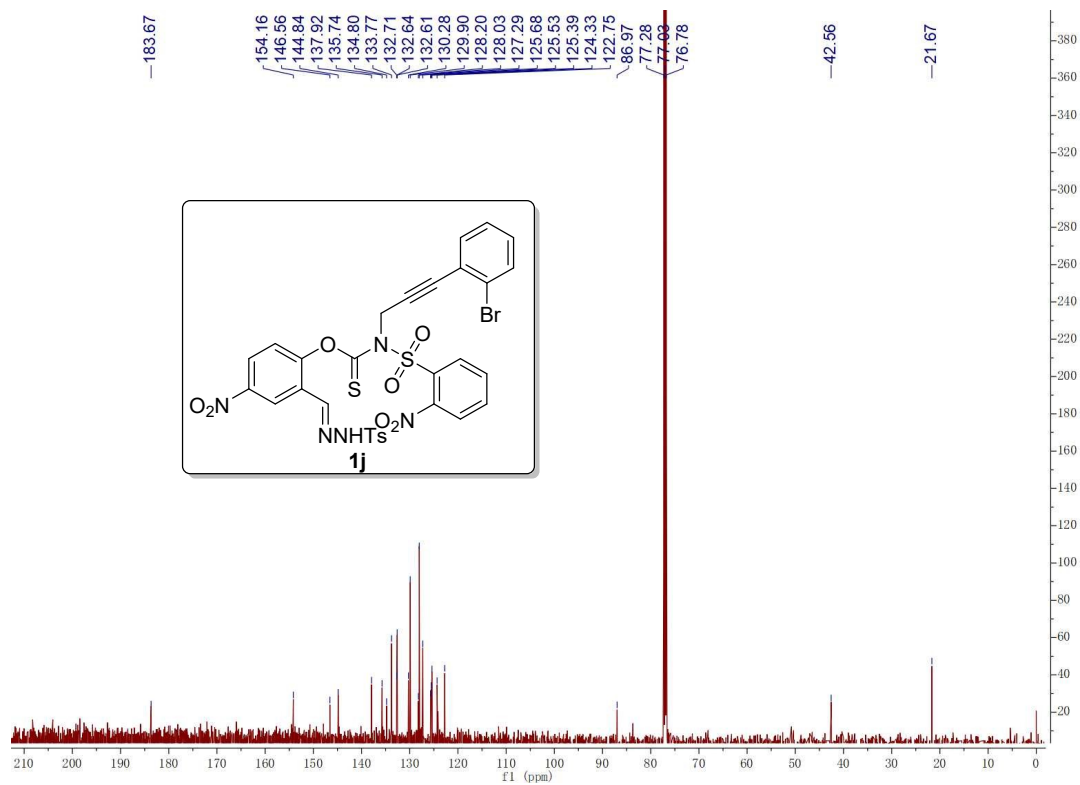

**(E)-O-(4-nitro-2-((2-tosylhydrazineylidene)methyl)phenyl) (3-(2-fluorophenyl)prop-2-yn-1-yl)((2-nitrophenyl)sulfonyl)carbamothioate (1k)**

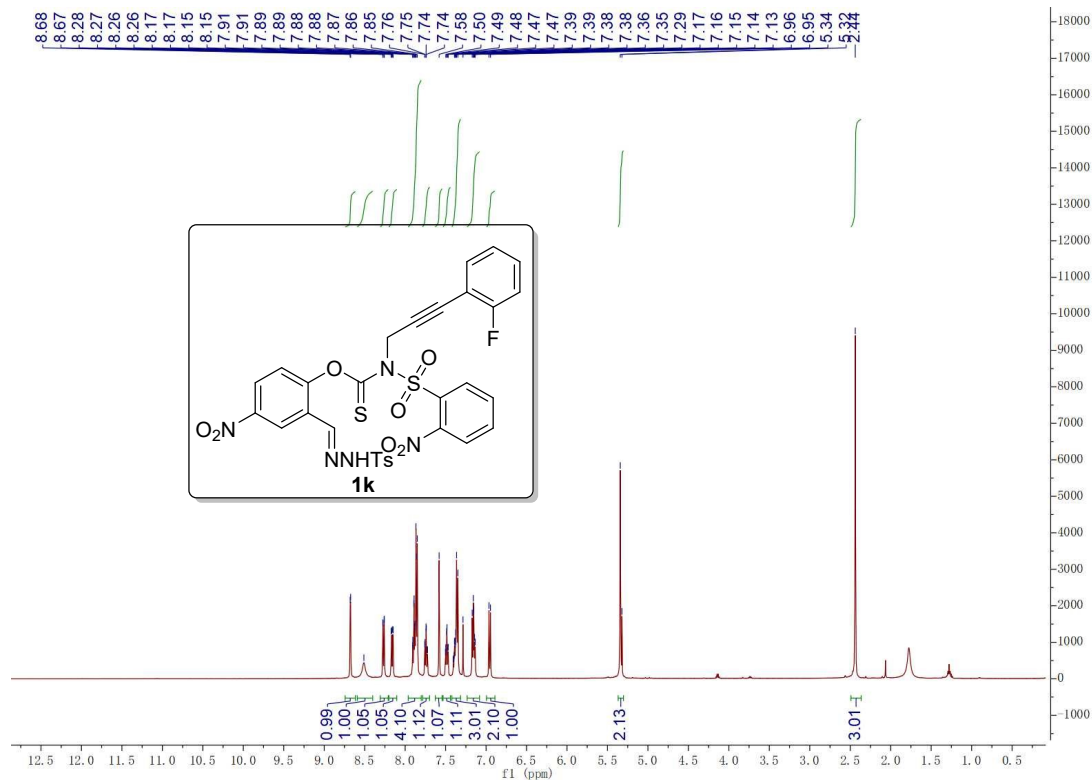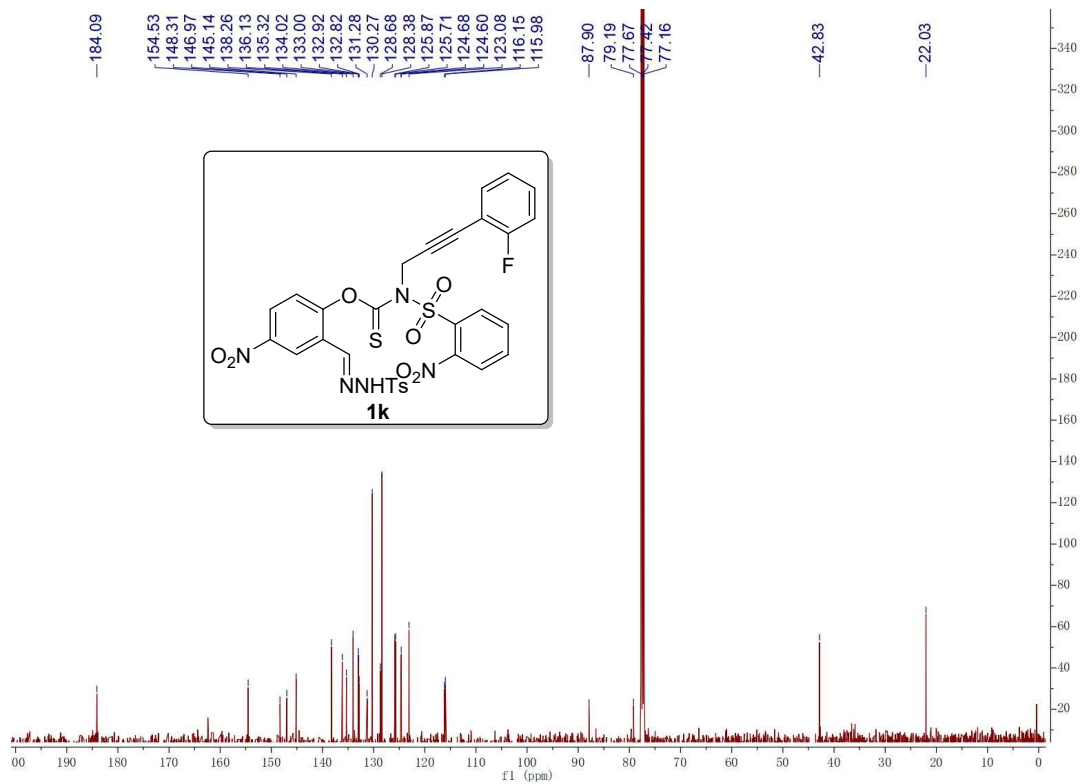

**(E)-O-(4-nitro-2-((2-tosylhydrazineylidene)methyl)phenyl) (3-(4-chlorophenyl)prop-2-yn-1-yl)((3-nitrophenyl)sulfonyl)carbamothioate (11)**

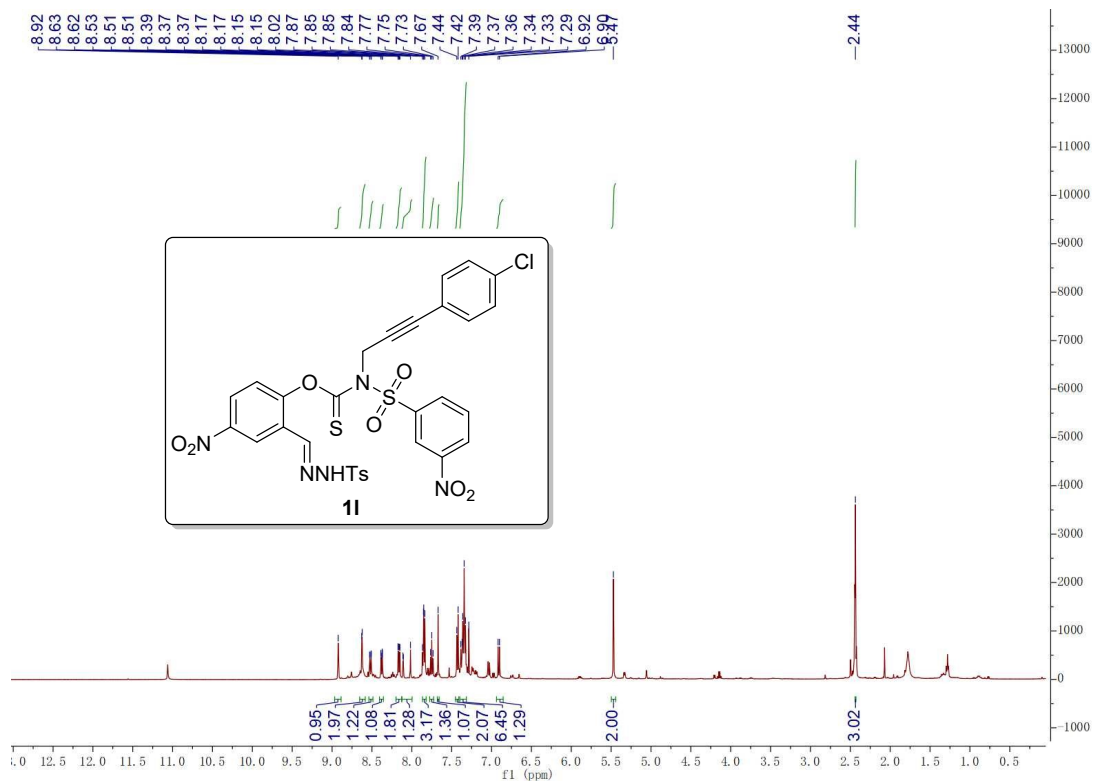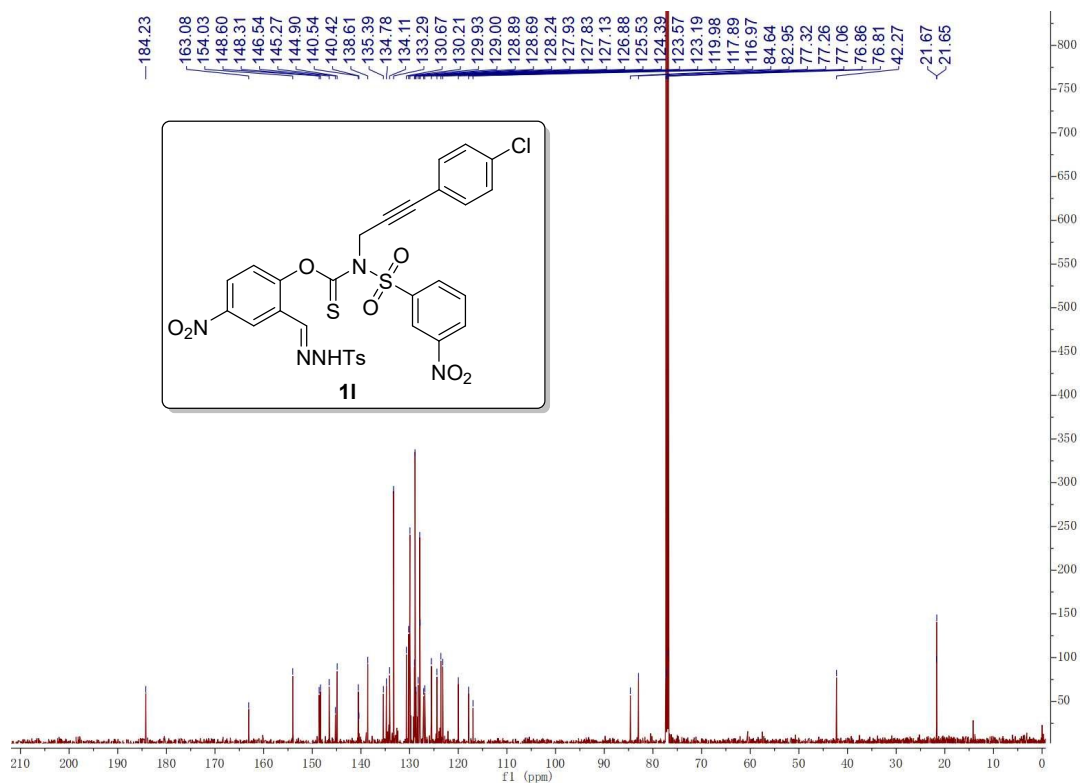

**(E)-O-(4-nitro-2-((2-tosylhydrazineylidene)methyl)phenyl) ((3-nitrophenyl)sulfonyl)(3-(o-tolyl)prop-2-yn-1-yl)carbamothioate (1m)**

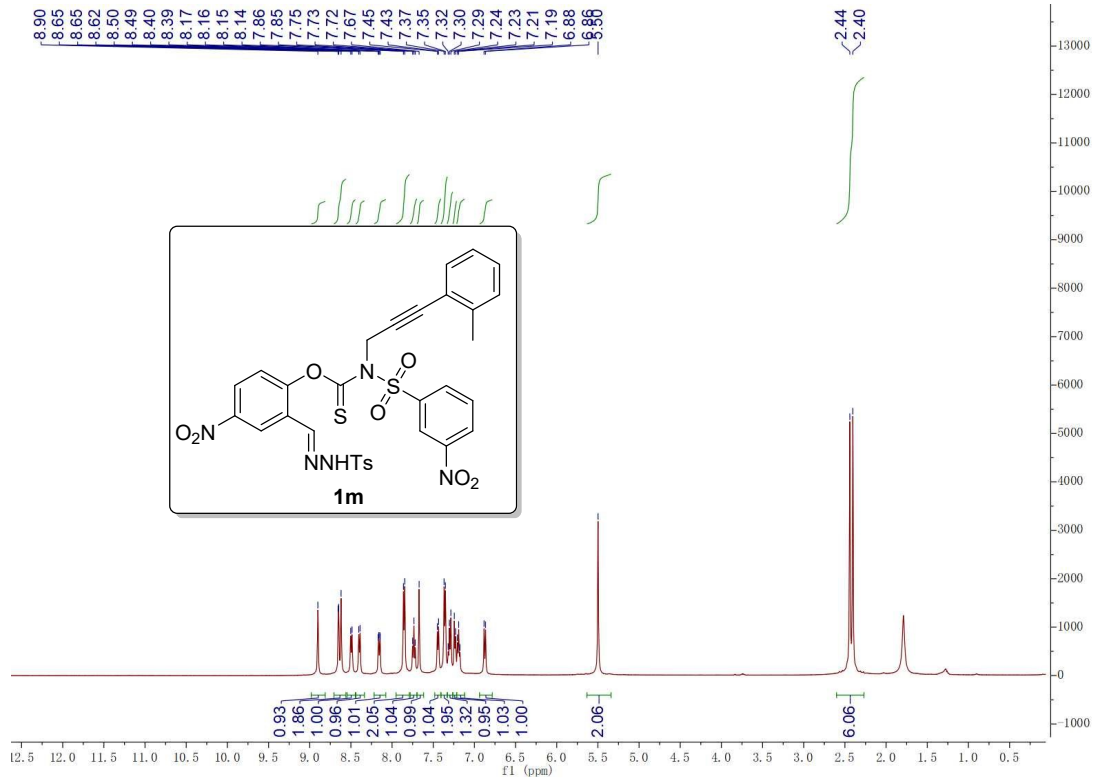



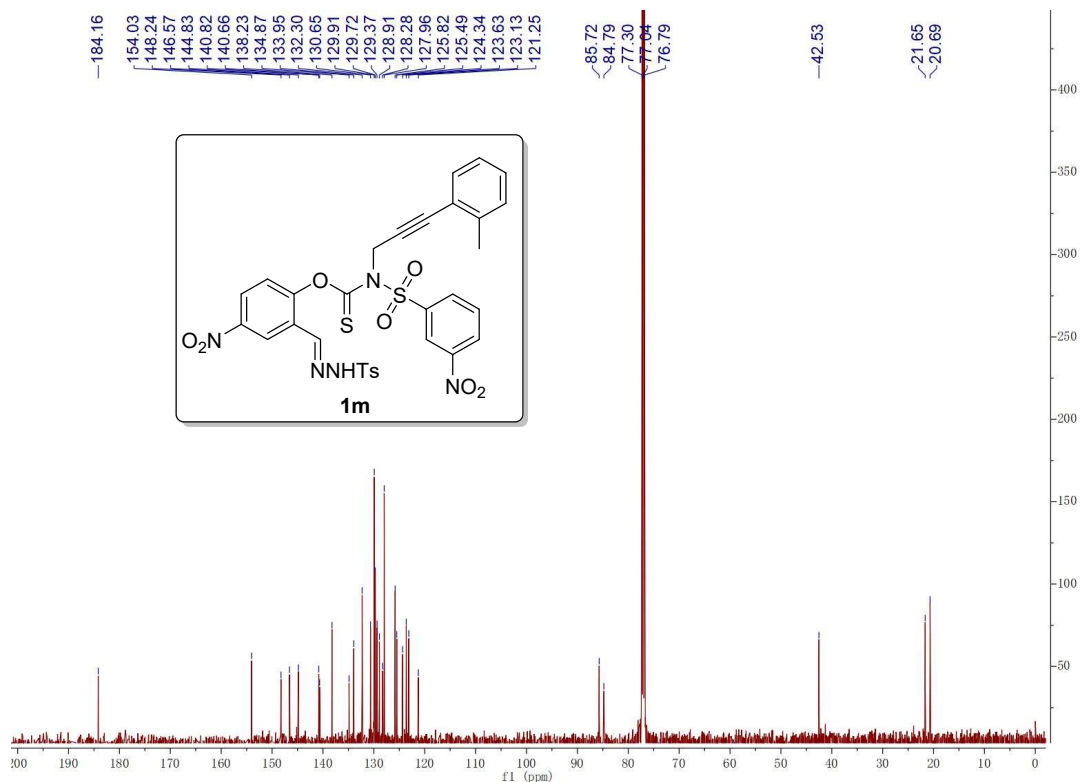

**(E)-O-(4-nitro-2-((2-tosylhydrazineylidene)methyl)phenyl) (3-(2-methoxyphenyl)prop-2-yn-1-yl)((3-nitrophenyl)sulfonyl)carbamothioate (1n)**

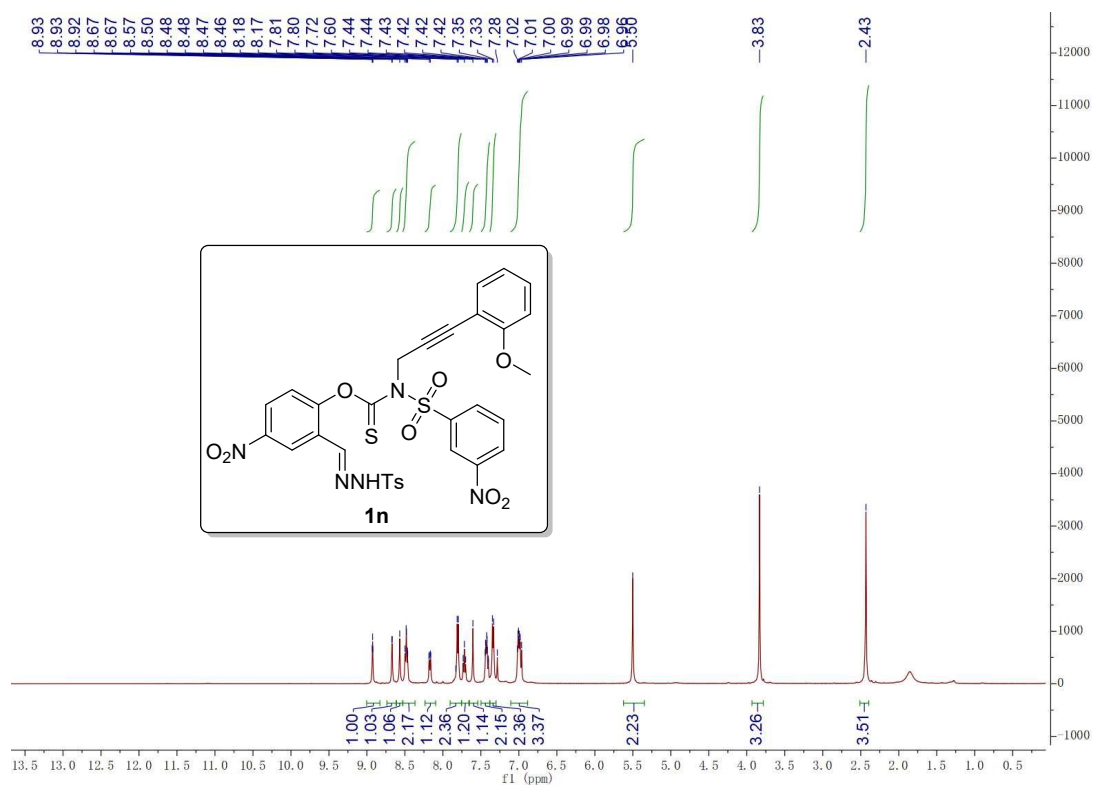

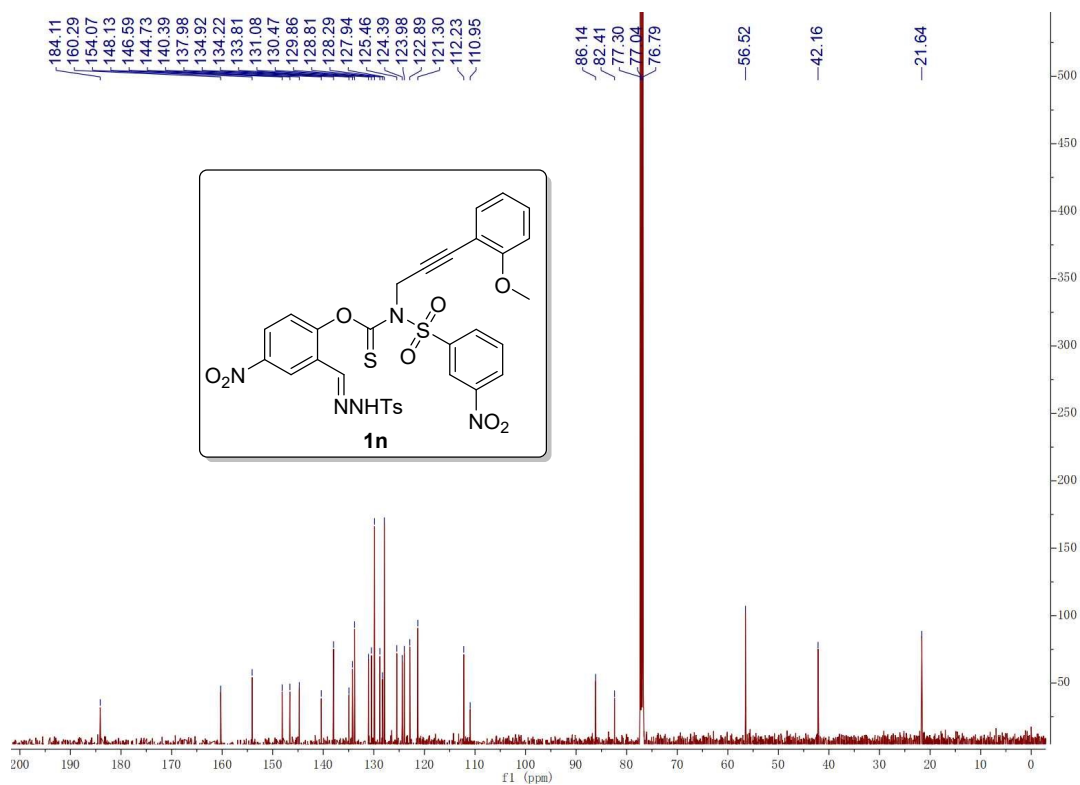

**(E)-O-(4-nitro-2-((2-tosylhydrazineylidene)methyl)phenyl) (3-(3-bromophenyl)prop-2-yn-1-yl)((3-nitrophenyl)sulfonyl)carbamothioate (1o)**

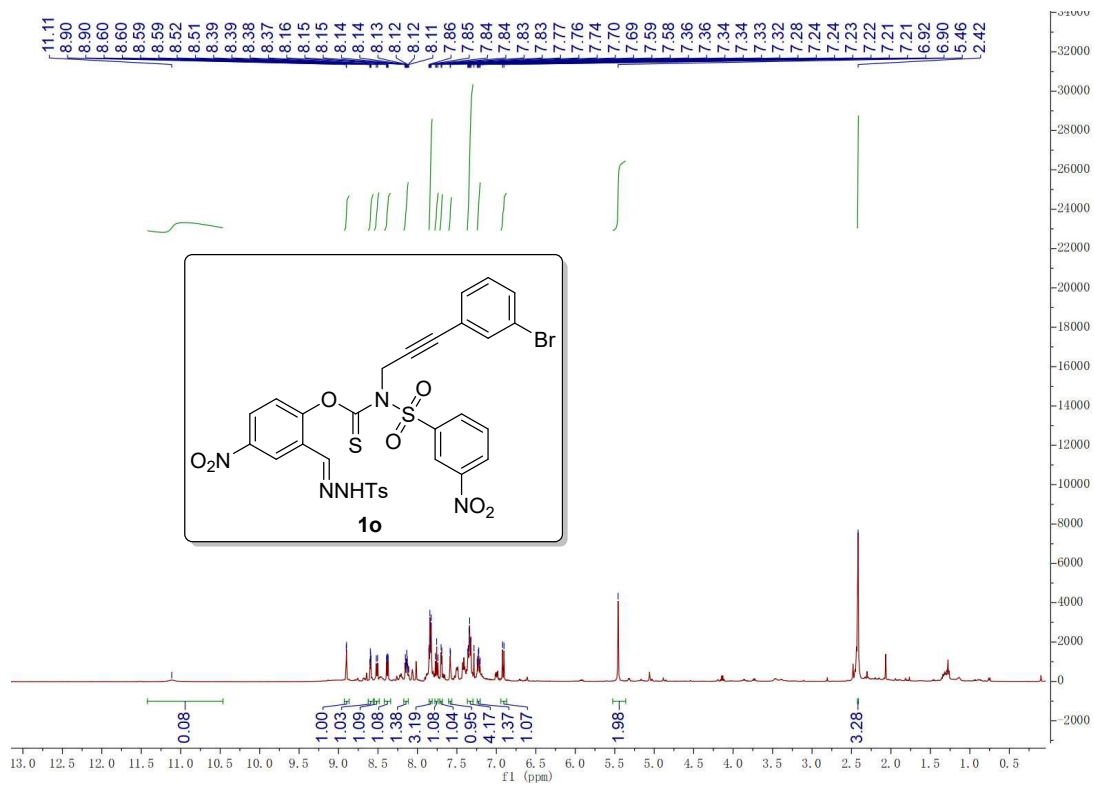

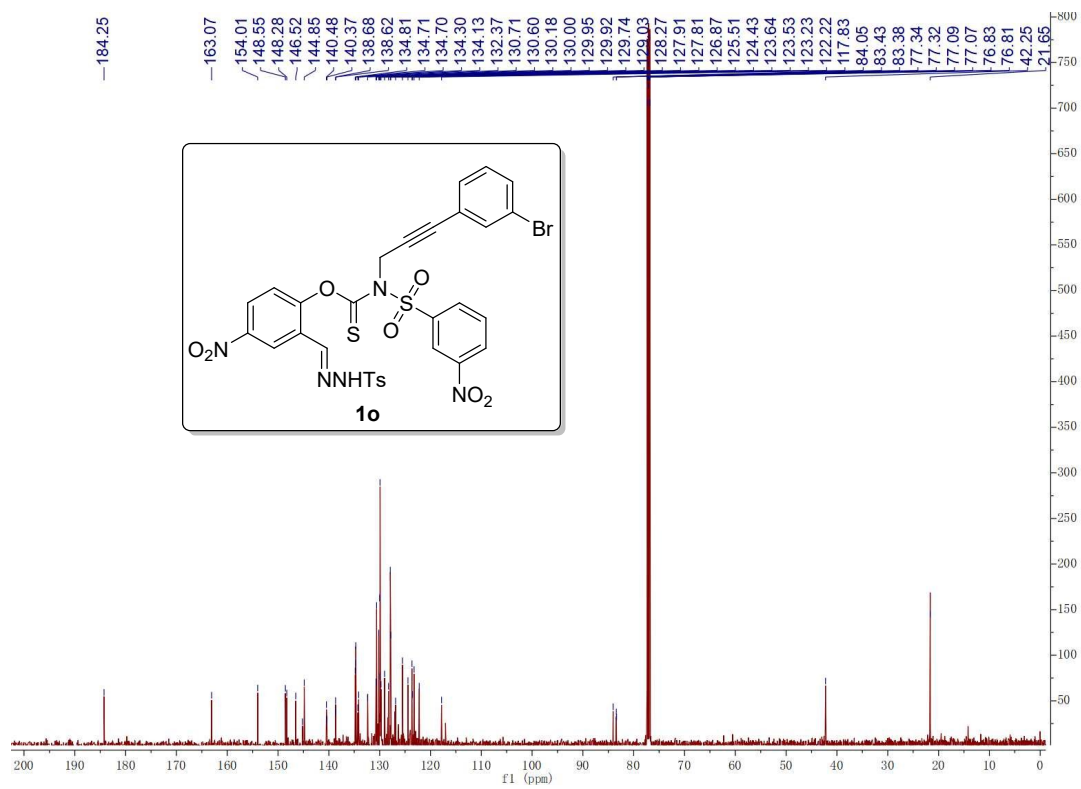

**N-(4-(2-hydroxy-5-nitrophenyl)-1,2,3-thiadiazol-5-yl)-2-nitro-N-(3-phenylprop-2-yn-1-yl)benzenesulfonamide (2a)**

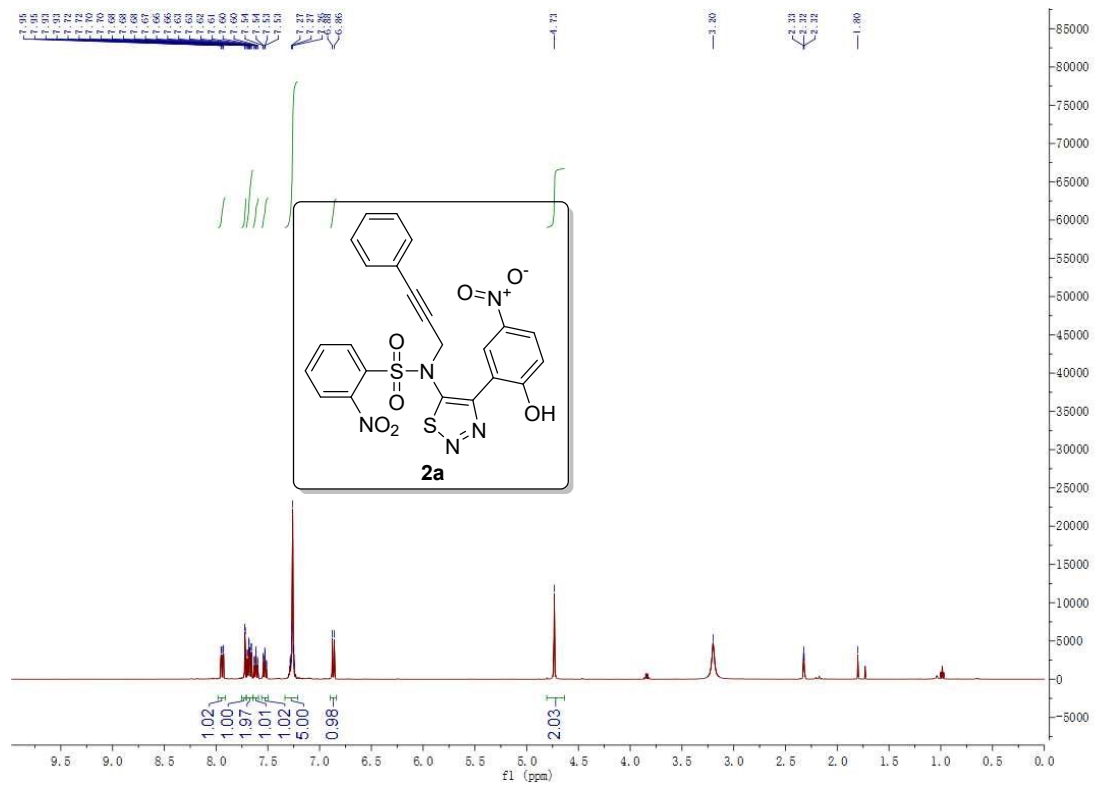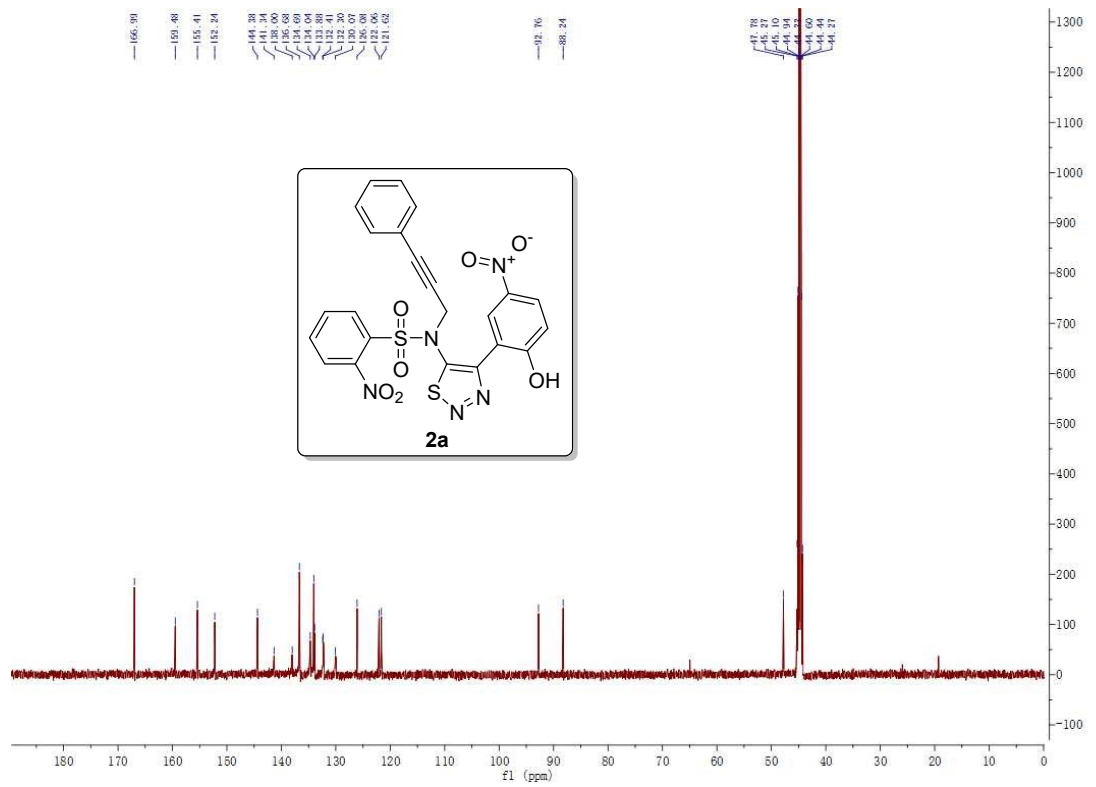

**N-(3-(4-fluorophenyl)prop-2-yn-1-yl)-N-(4-(2-hydroxy-5-nitrophenyl)-1,2,3-thiadiazol-5-yl)-**

## 2-nitrobenzenesulfonamide (2b)

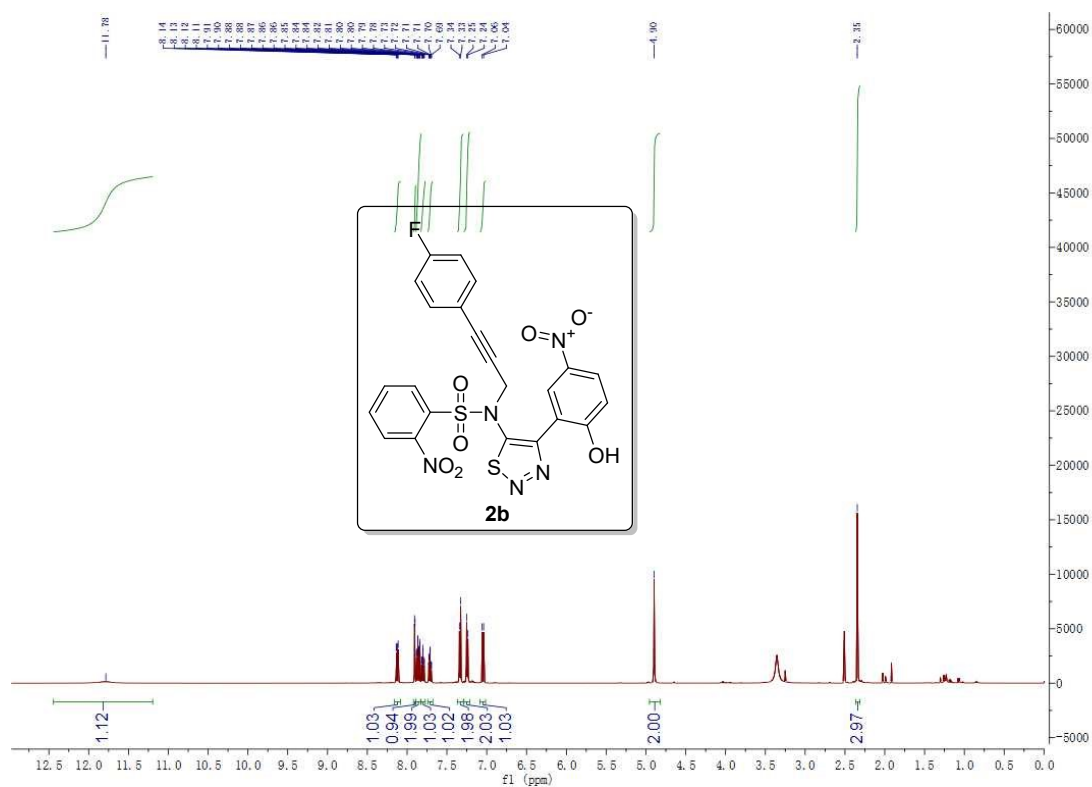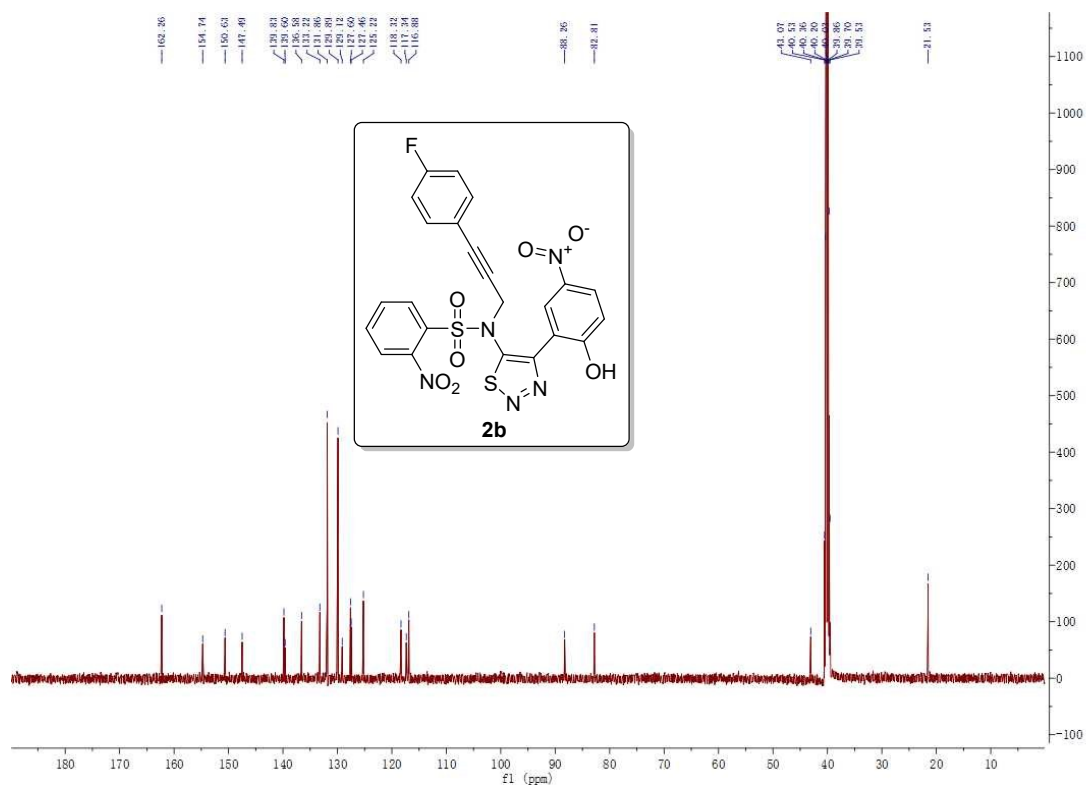

**N-(3-(4-chlorophenyl)prop-2-yn-1-yl)-N-(4-(2-hydroxy-5-nitrophenyl)-1,2,3-thiadiazol-5-yl)-2-nitrobenzenesulfonamide (2c)**

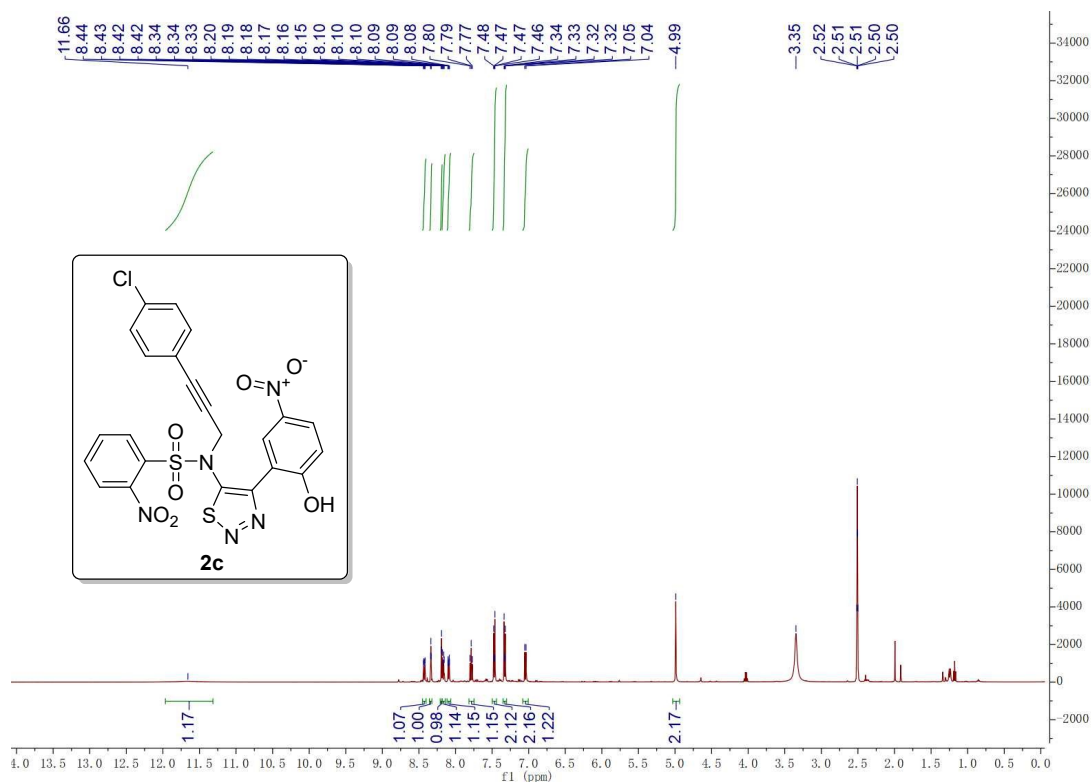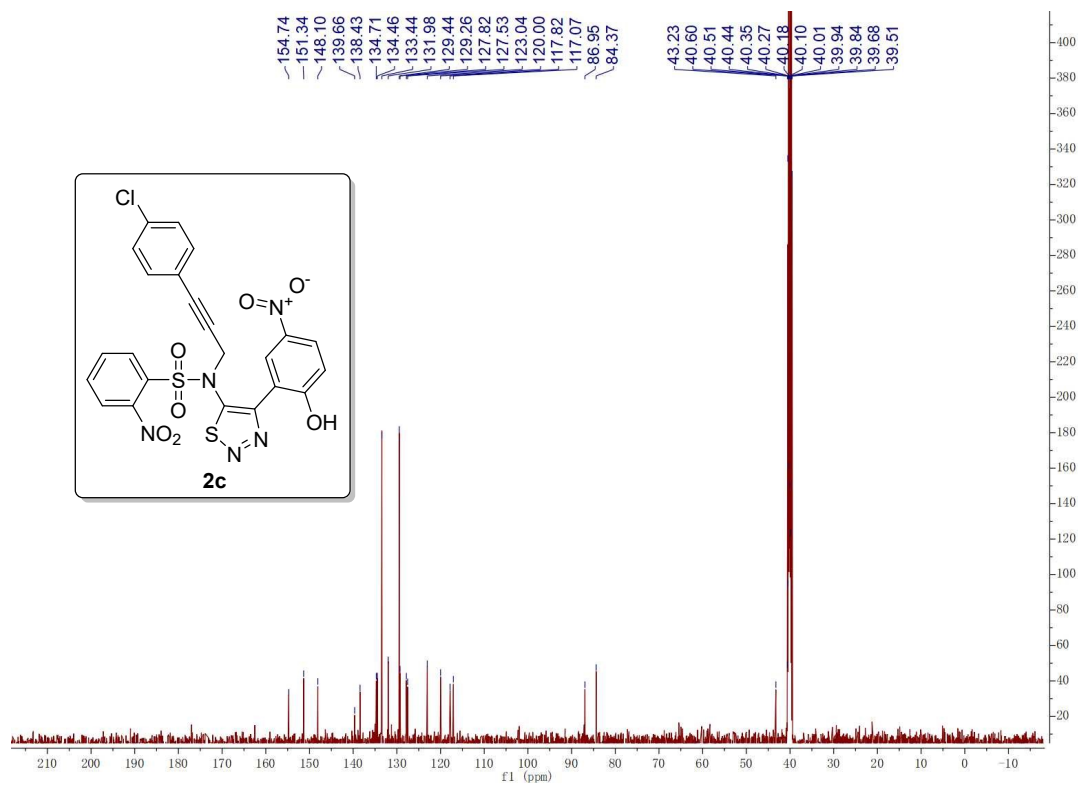

**N-(3-(4-bromophenyl)prop-2-yn-1-yl)-N-(4-(2-hydroxy-5-nitrophenyl)-1,2,3-thiadiazol-5-yl)-2-nitrobenzenesulfonamide (2d)**

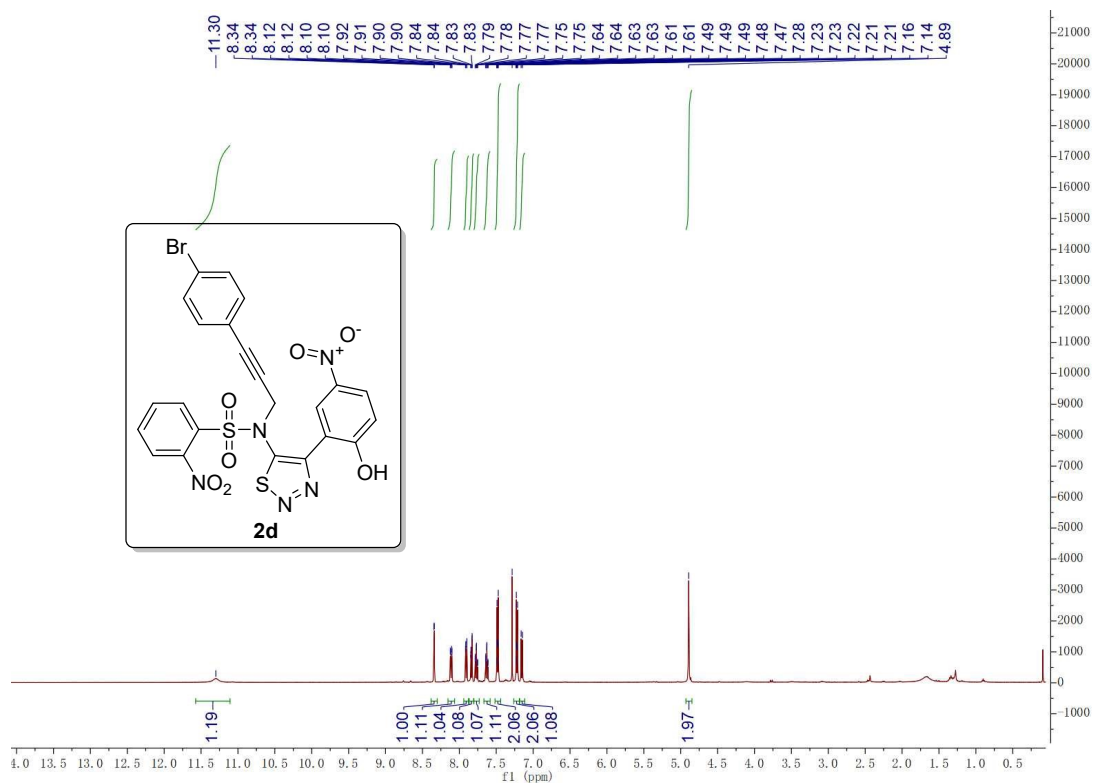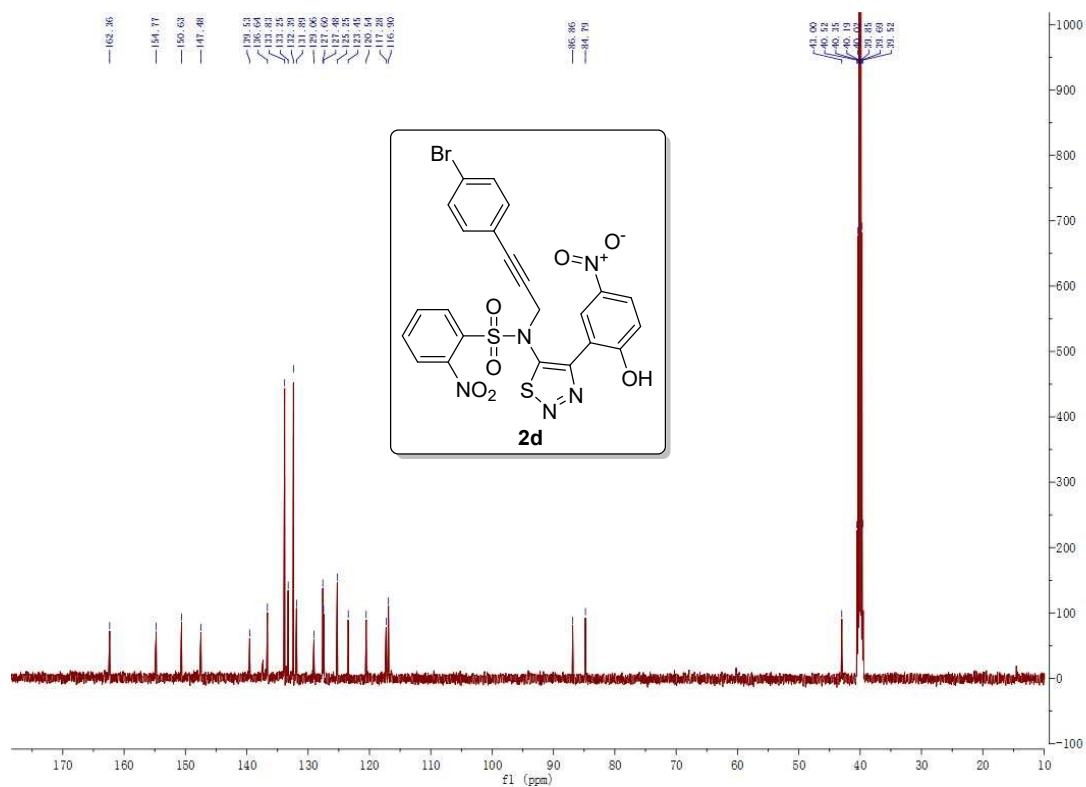

**N-(4-(2-hydroxy-5-nitrophenyl)-1,2,3-thiadiazol-5-yl)-N-(3-(4-methoxyphenyl)prop-2-yn-1-yl)-2-nitrobenzenesulfonamide (2e)**

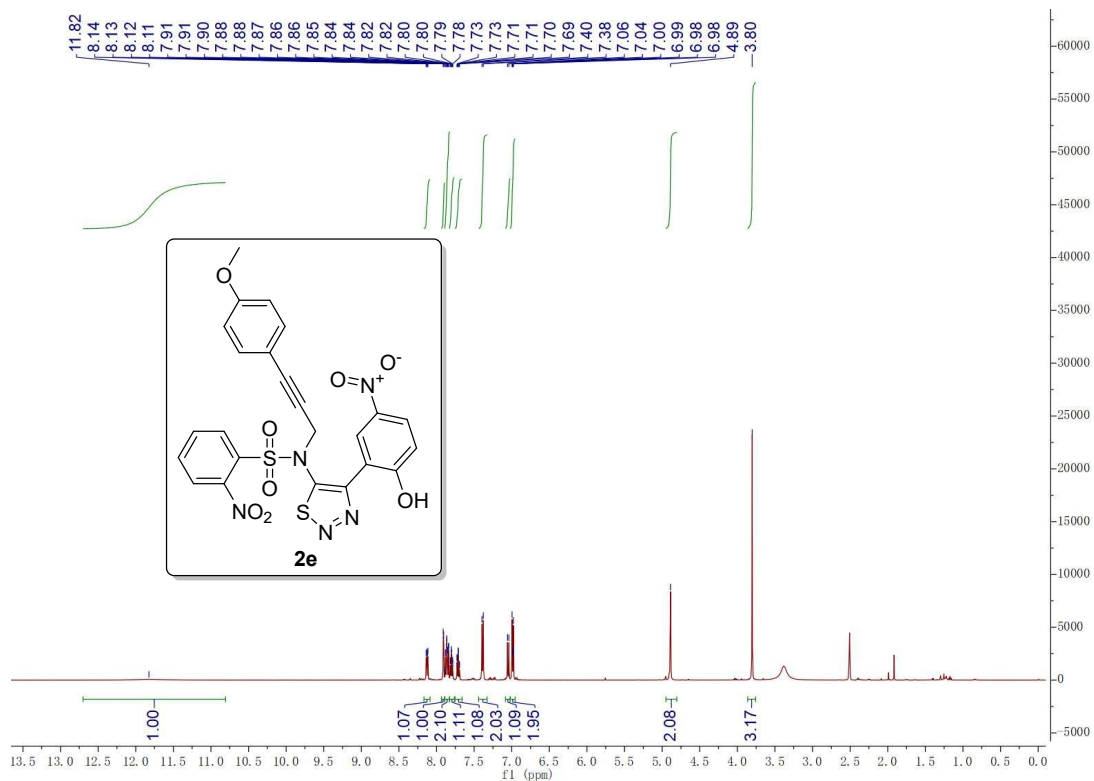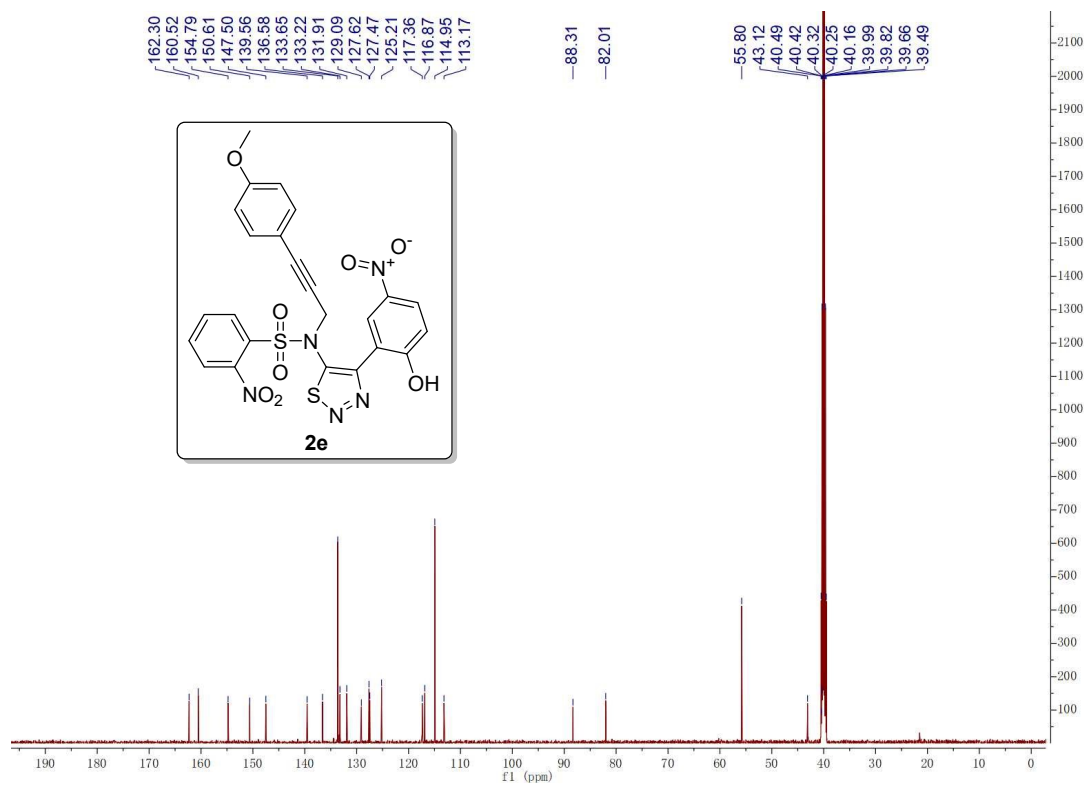



**N-(4-(2-hydroxy-5-nitrophenyl)-1,2,3-thiadiazol-5-yl)-2-nitro-N-(3-(p-tolyl)prop-2-yn-1-yl)benzenesulfonamide (2f)**

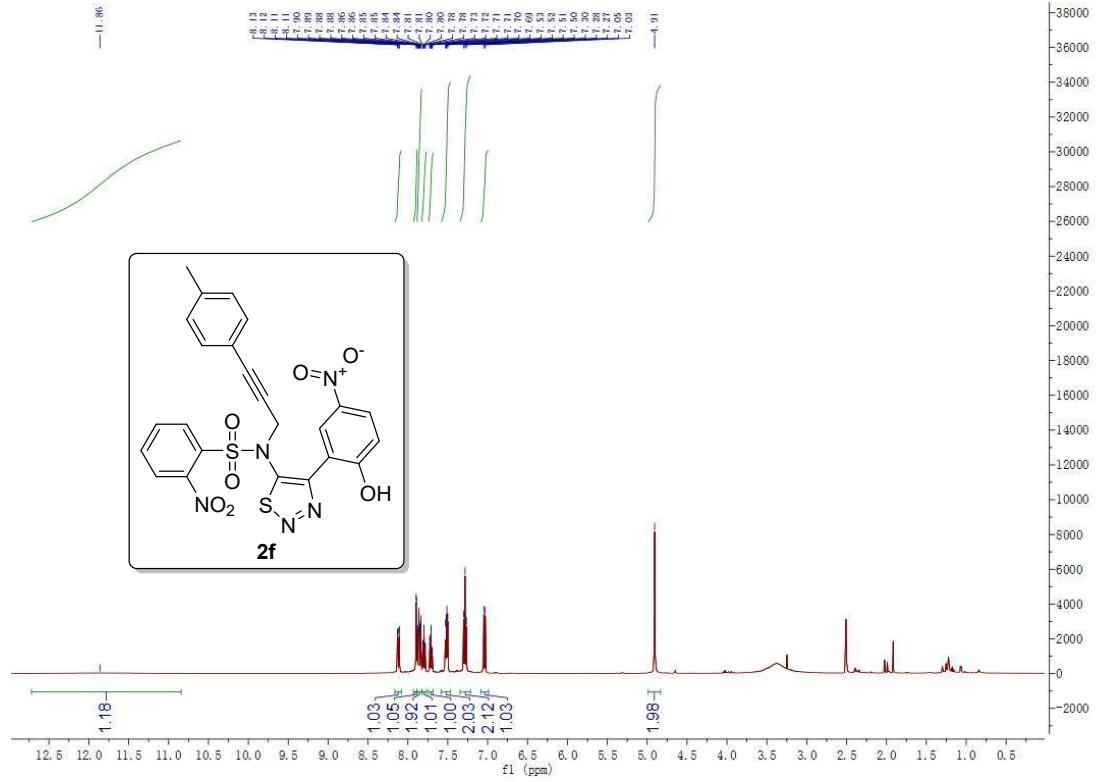

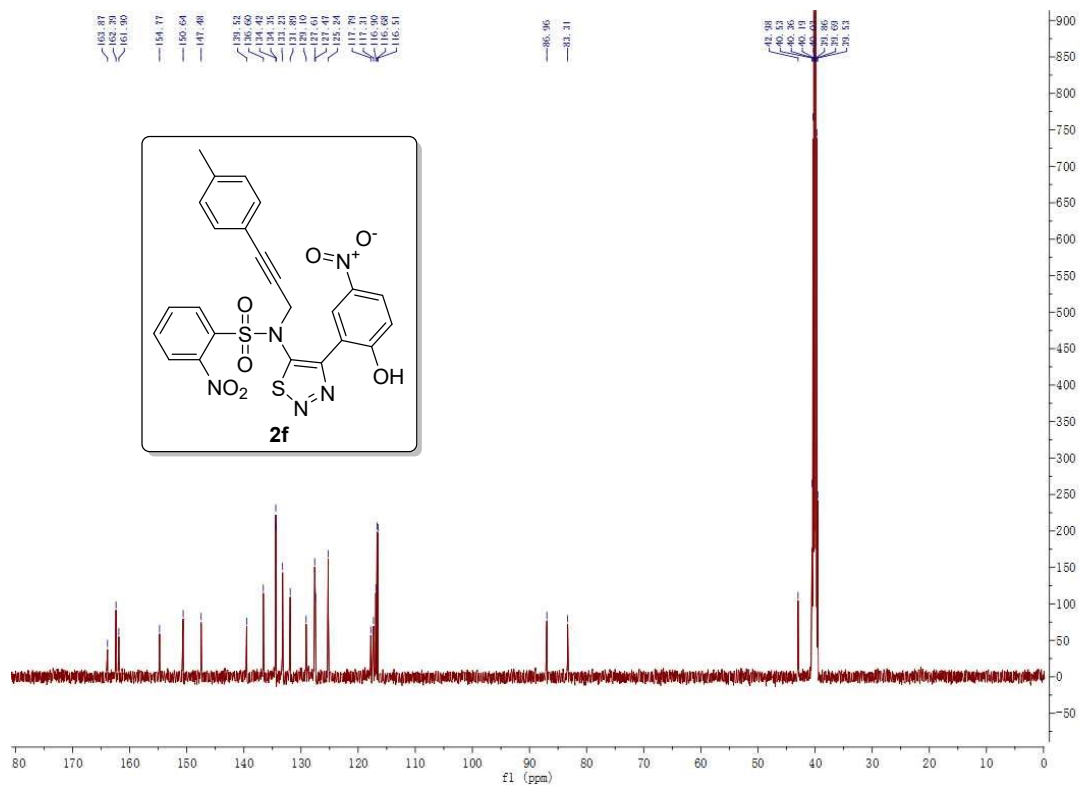

**N-(3-(2-cyanophenyl)prop-2-yn-1-yl)-N-(4-(2-hydroxy-5-nitrophenyl)-1,2,3-thiadiazol-5-yl)-2-nitrobenzenesulfonamide (2g)**

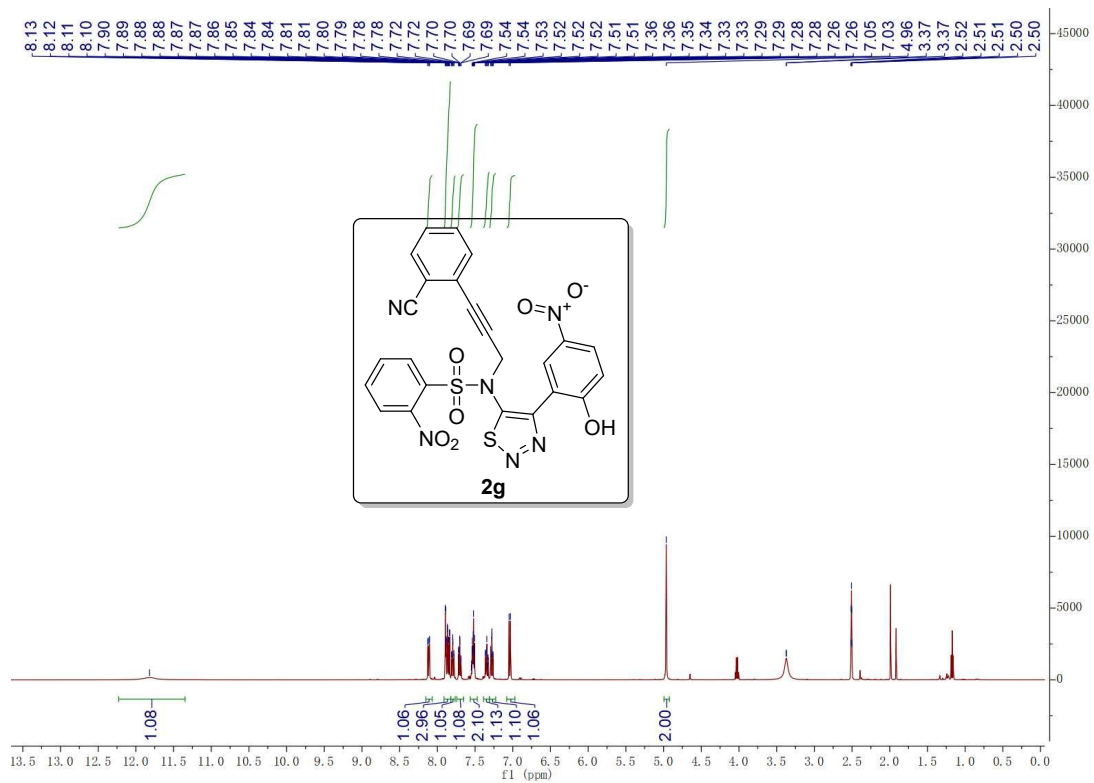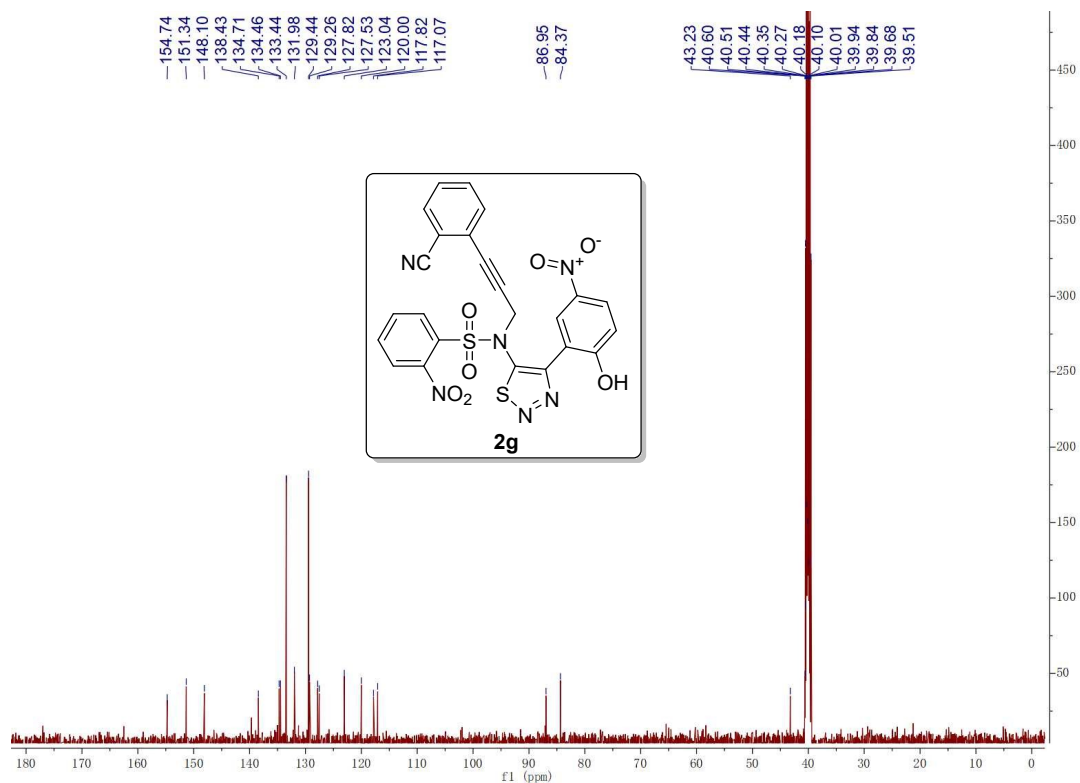

**N-(3-(2-bromophenyl)prop-2-yn-1-yl)-N-(4-(2-hydroxy-5-nitrophenyl)-1,2,3-thiadiazol-5-yl)-2-nitrobenzenesulfonamide (2h)**

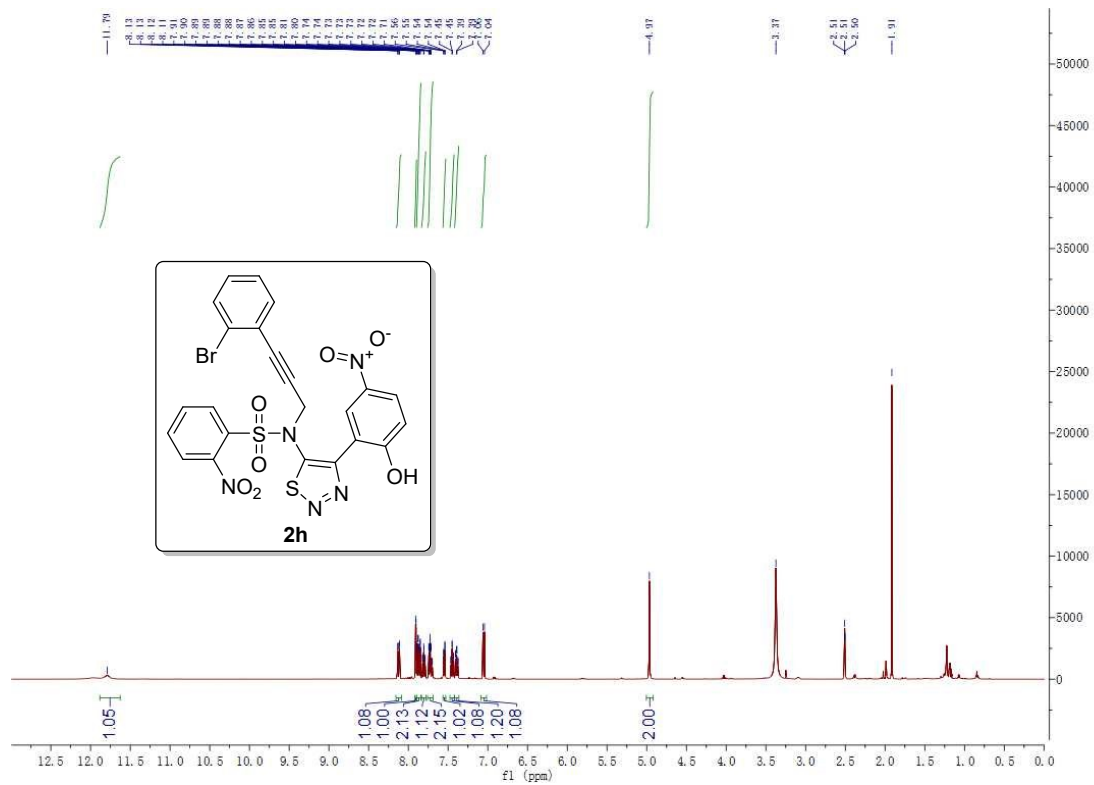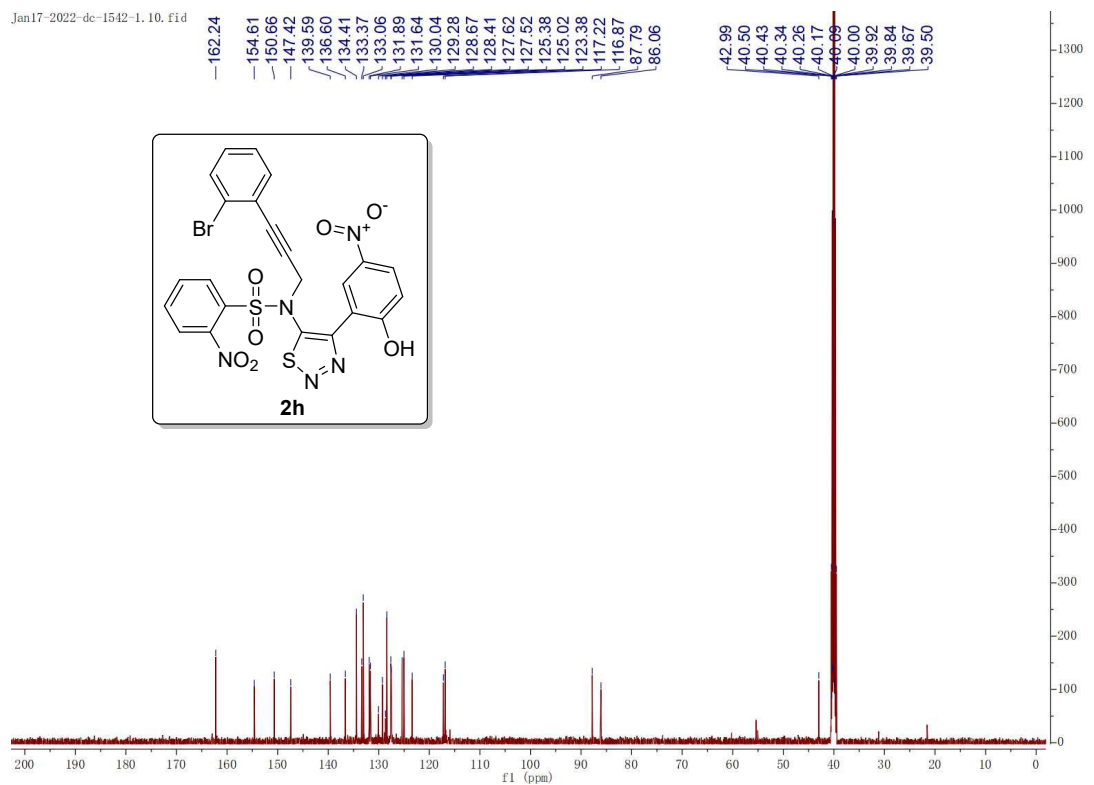

**N-(4-(2-hydroxy-5-nitrophenyl)-1,2,3-thiadiazol-5-yl)-N-(3-(2-methoxyphenyl)prop-2-yn-1-yl)-**

## 2-nitrobenzenesulfonamide (2i)

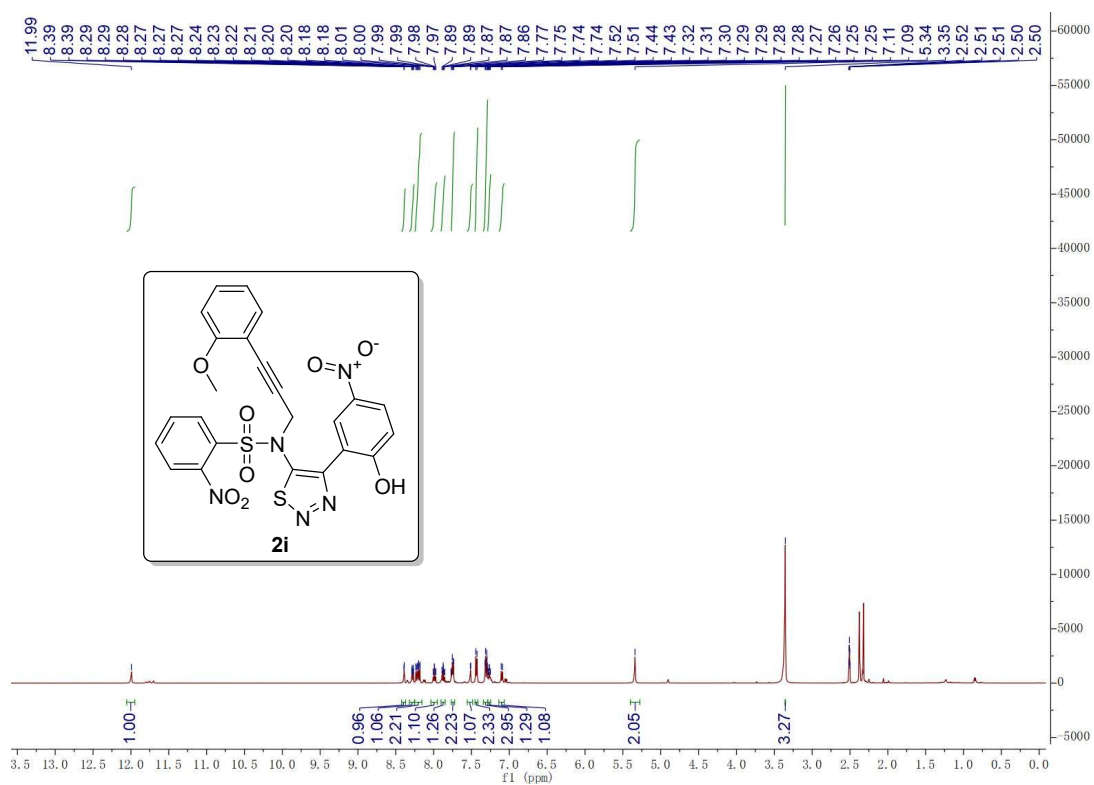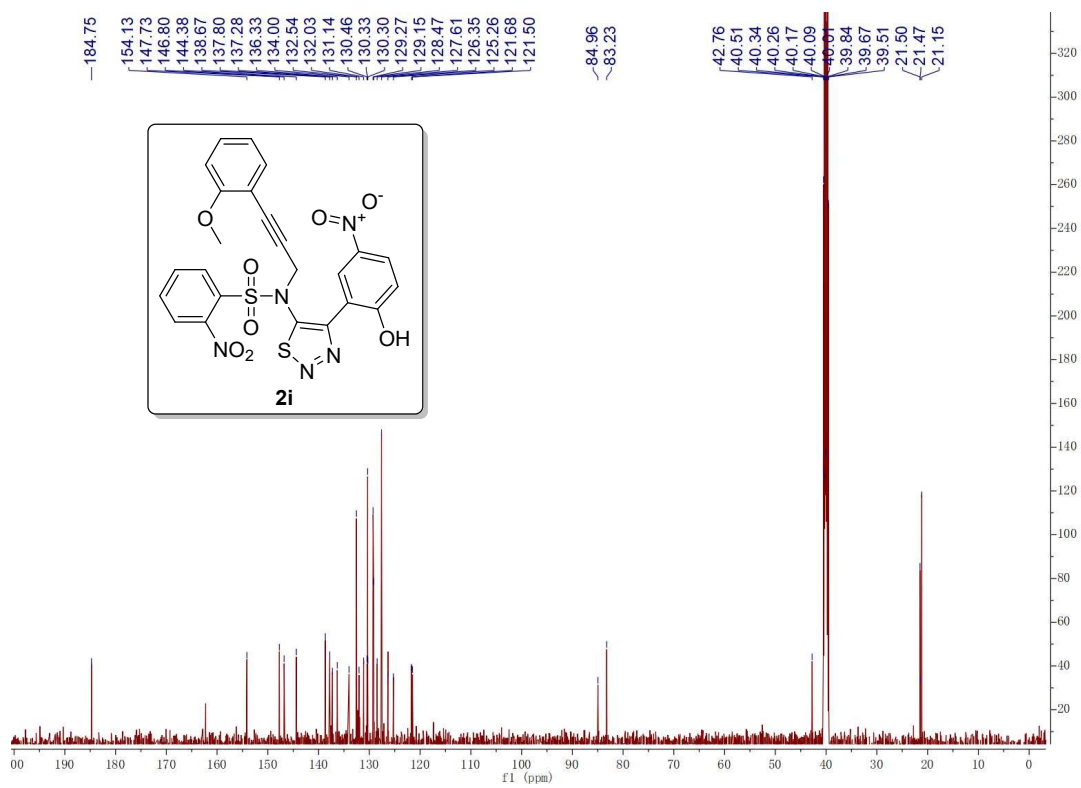

**N-(4-(2-hydroxy-5-nitrophenyl)-1,2,3-thiadiazol-5-yl)-3-nitro-N-(3-phenylprop-2-yn-1-yl)benzenesulfonamide (2j)**

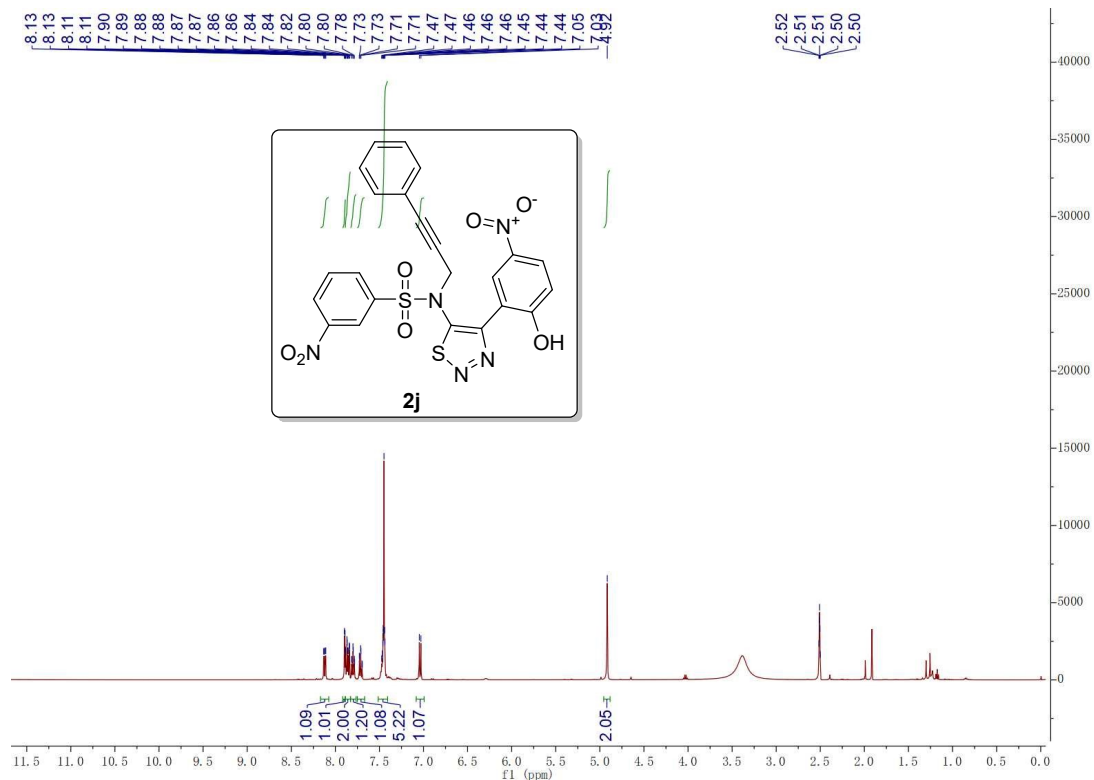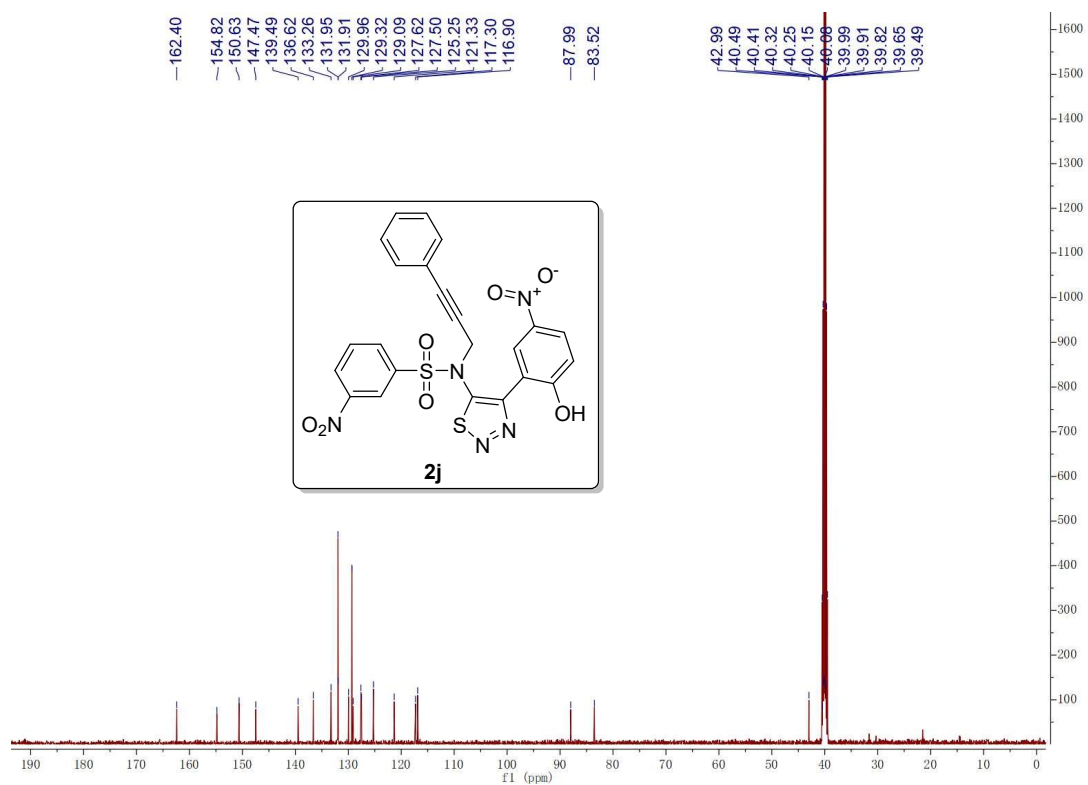

**N-(3-(2-bromophenyl)prop-2-yn-1-yl)-N-(4-(2-hydroxy-5-nitrophenyl)-1,2,3-thiadiazol-5-yl)-3-nitrobenzenesulfonamide (2k)**

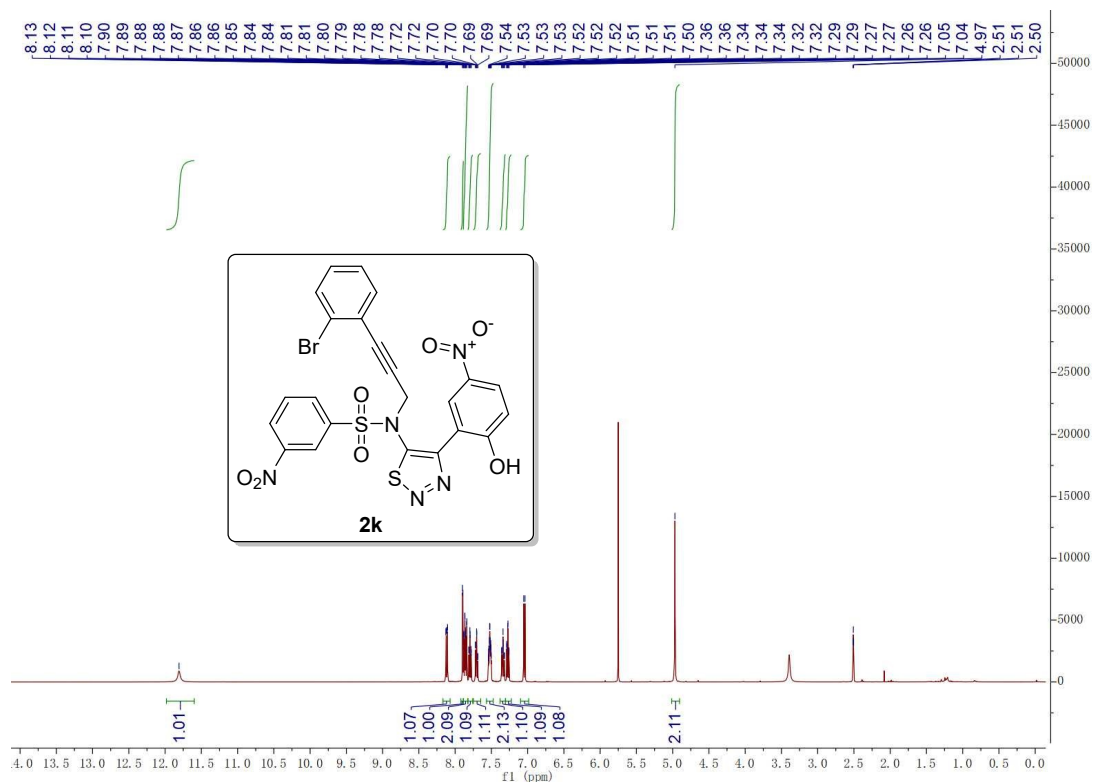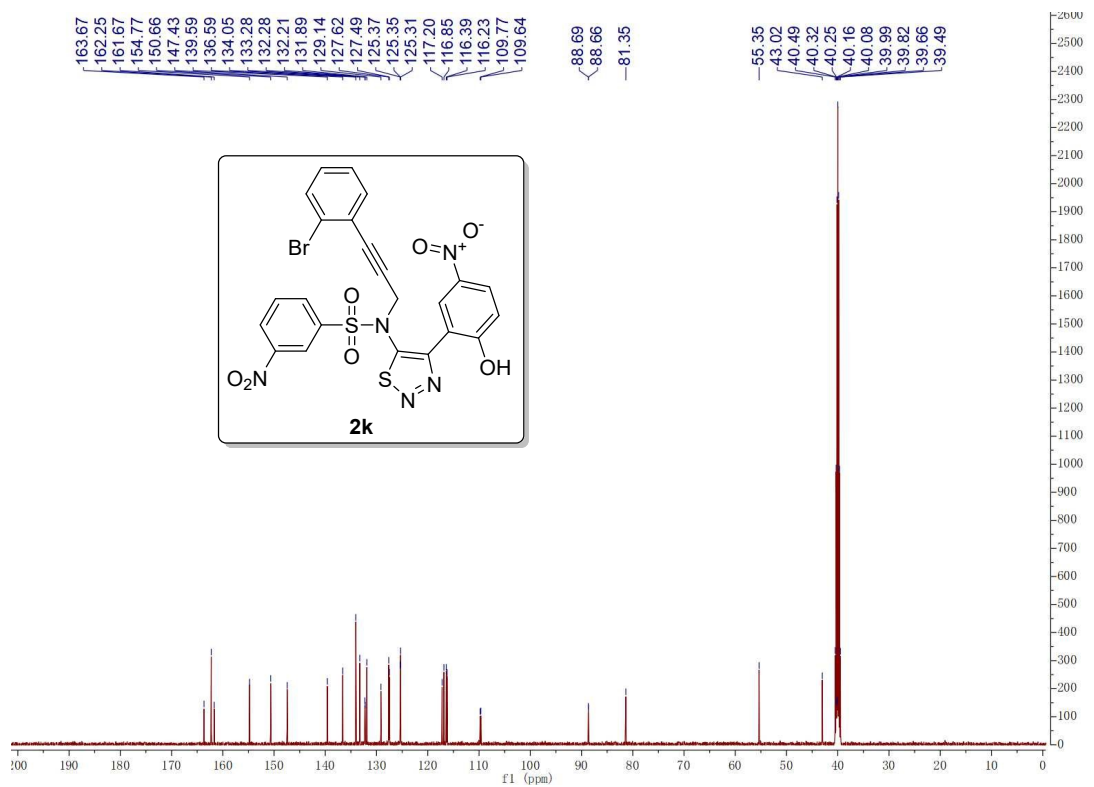

**N-(3-(3-bromophenyl)prop-2-yn-1-yl)-N-(4-(2-hydroxy-5-nitrophenyl)-1,2,3-thiadiazol-5-yl)-3-nitrobenzenesulfonamide (2I)**

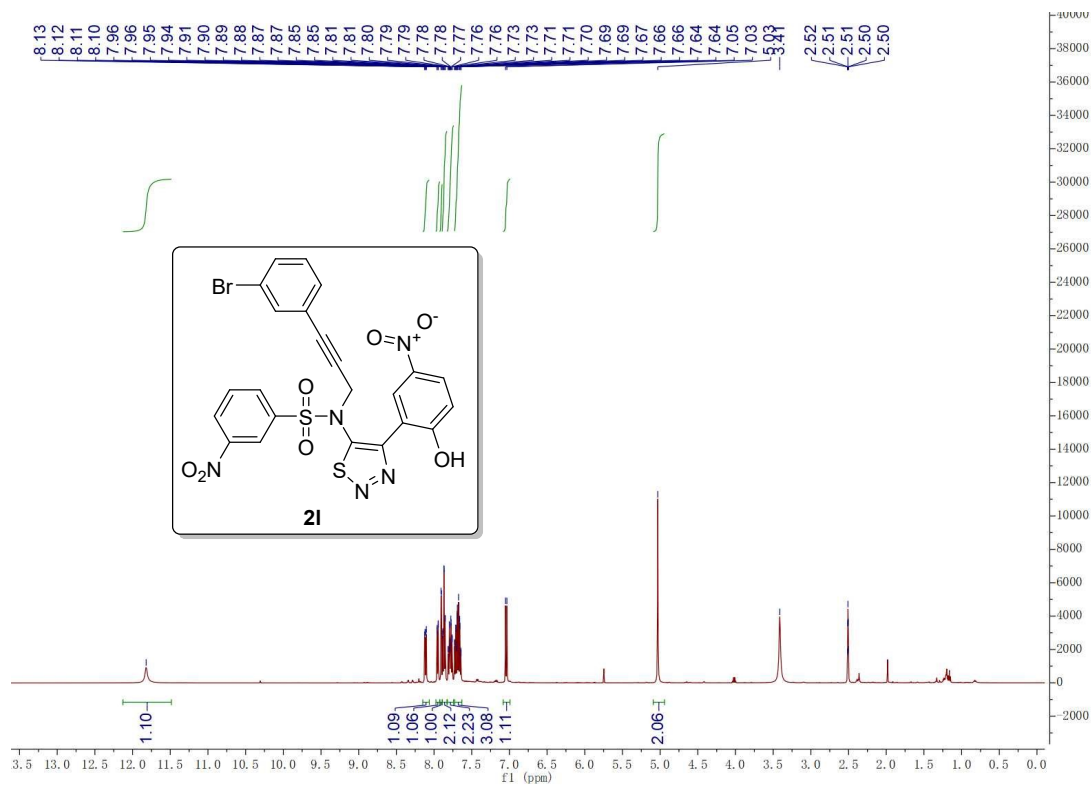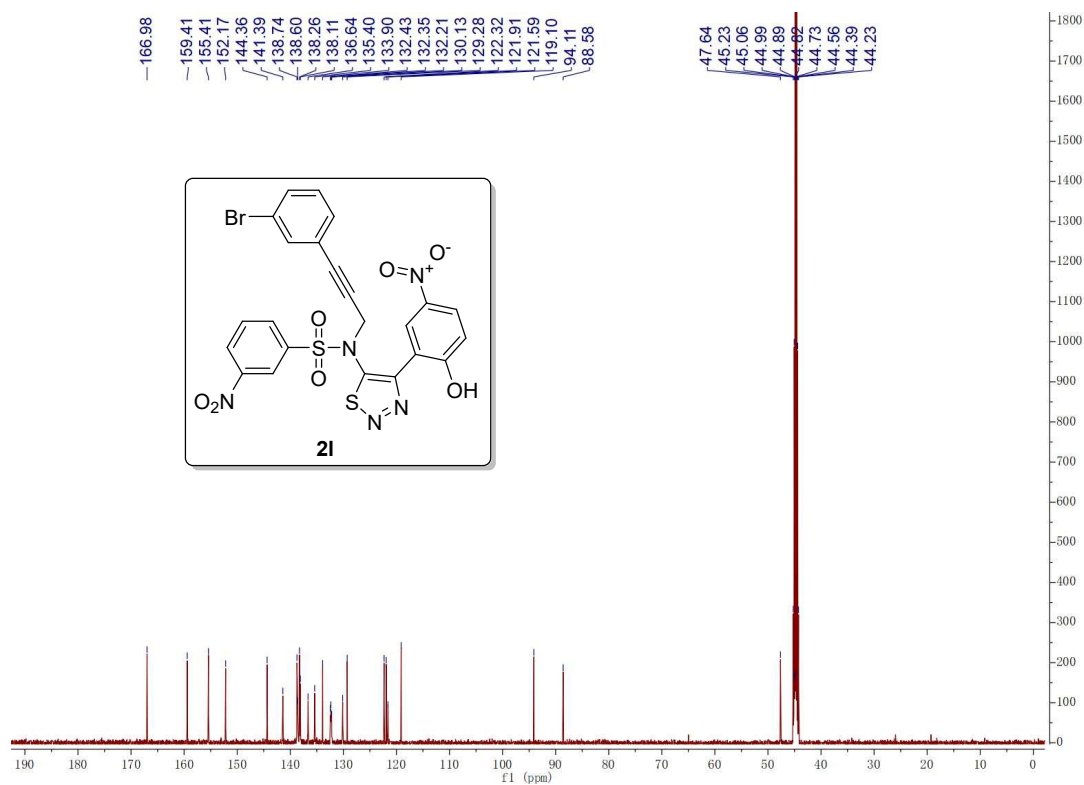



**N-(3-(4-chlorophenyl)prop-2-yn-1-yl)-N-(4-(2-hydroxy-5-nitrophenyl)-1,2,3-thiadiazol-5-yl)-3-nitrobenzenesulfonamide (2m)**

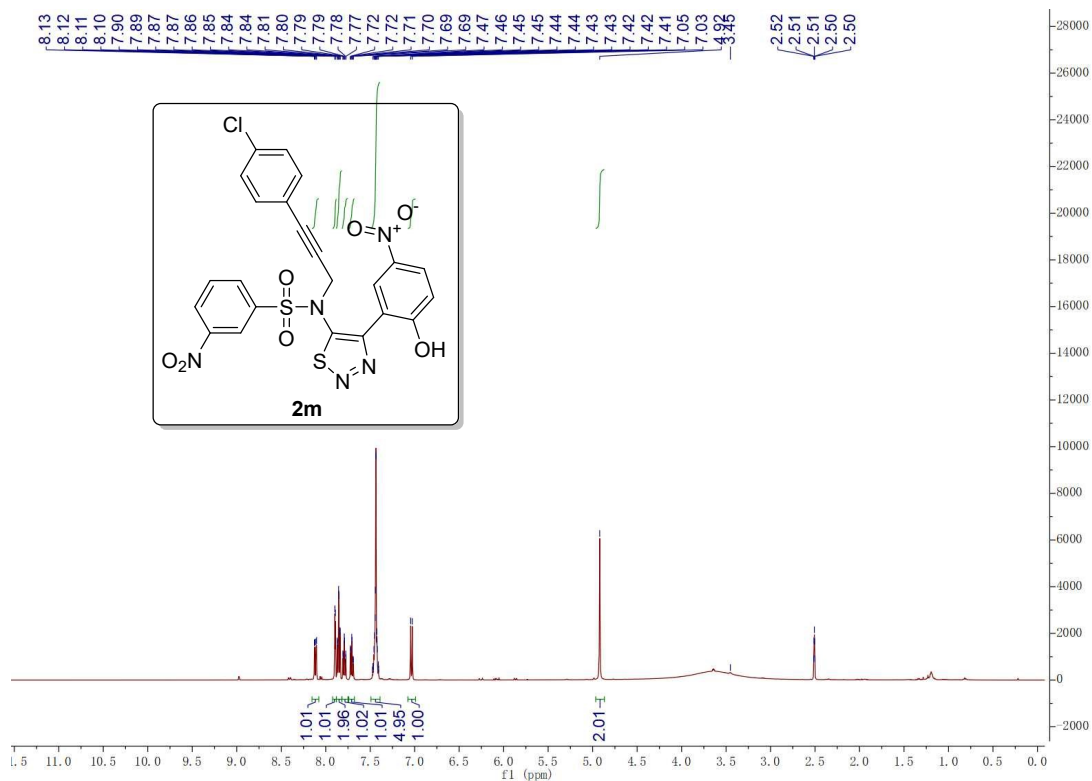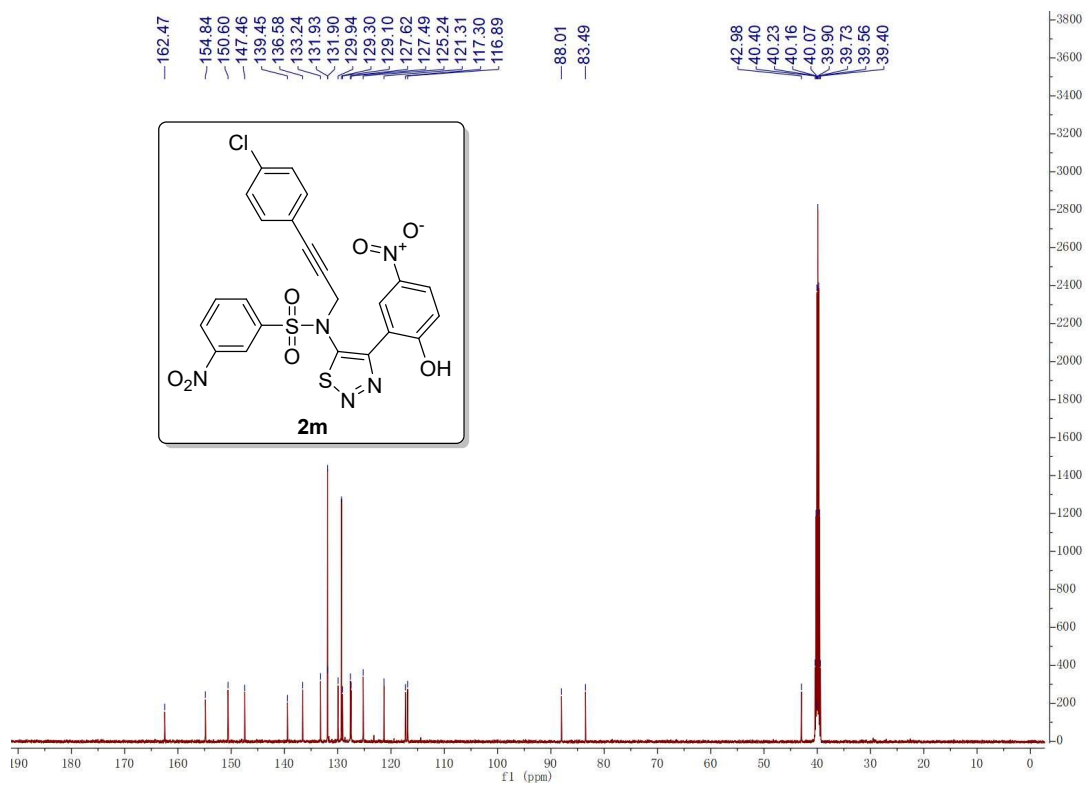

**N-(3-(4-fluorophenyl)prop-2-yn-1-yl)-N-(4-(2-hydroxy-5-nitrophenyl)-1,2,3-thiadiazol-5-yl)-3-nitrobenzenesulfonamide (2n)**

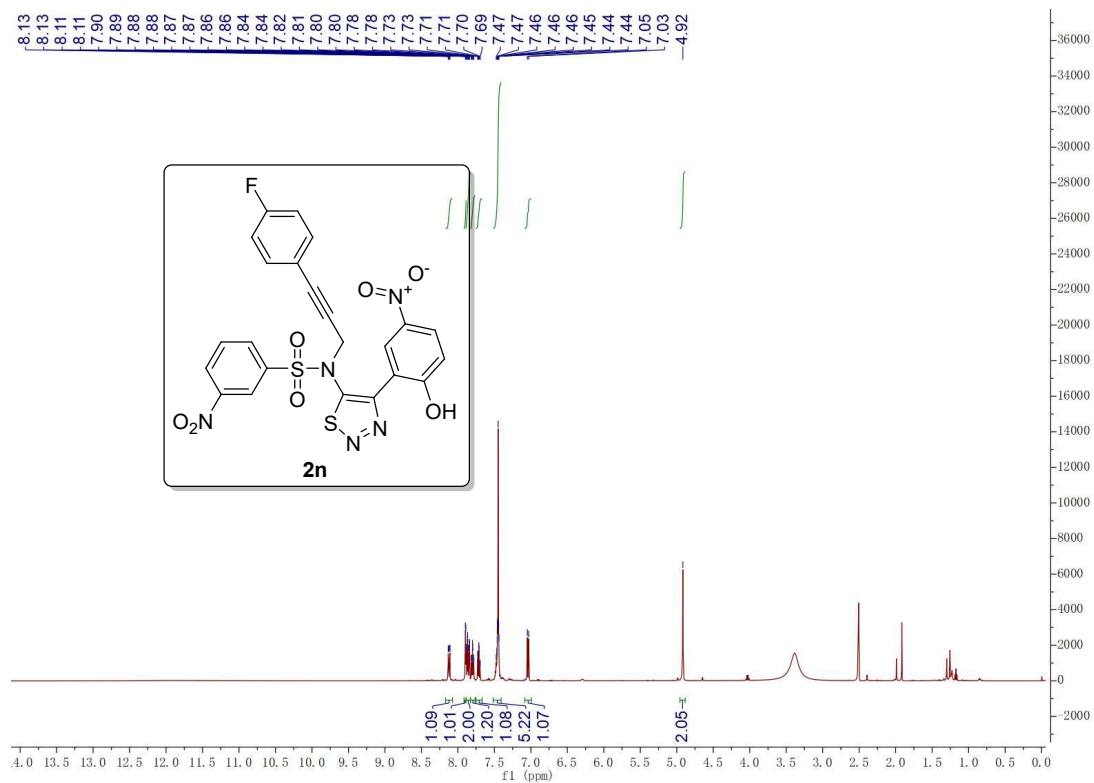

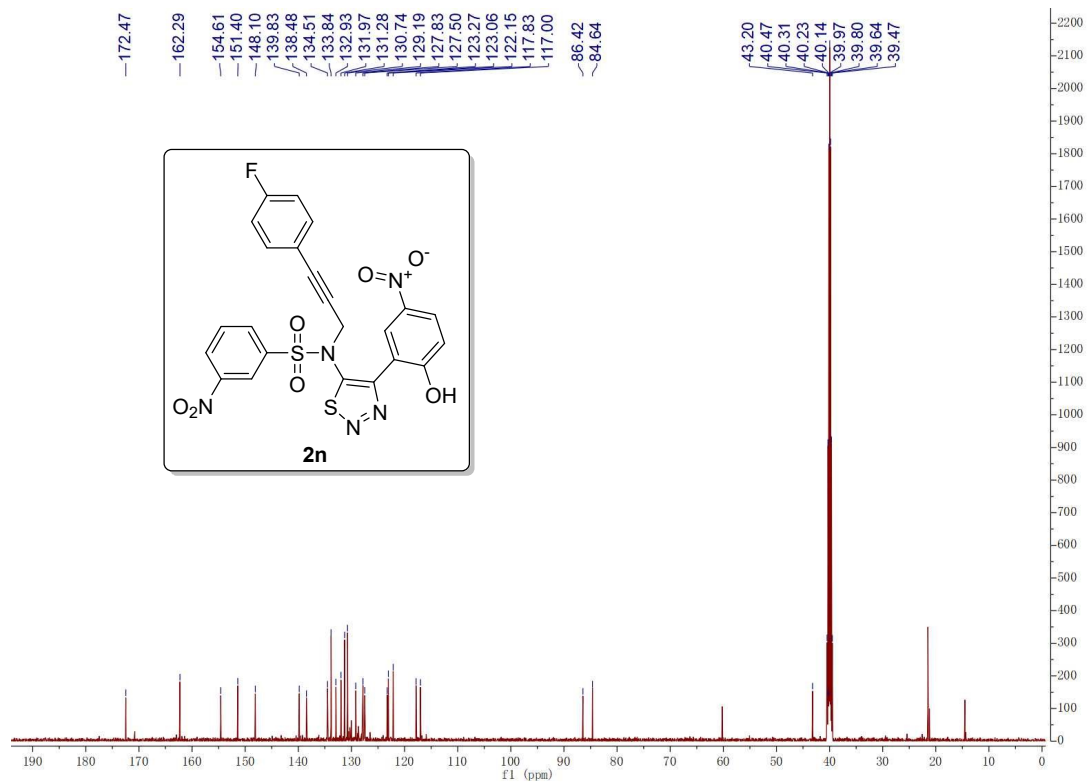

**Ethyl 4-(3-((N-(4-(2-hydroxy-5-nitrophenyl)-1,2,3-thiadiazol-5-yl)-3-nitrophenyl)sulfonamido)prop-1-yn-1-yl)benzoate (2o)**

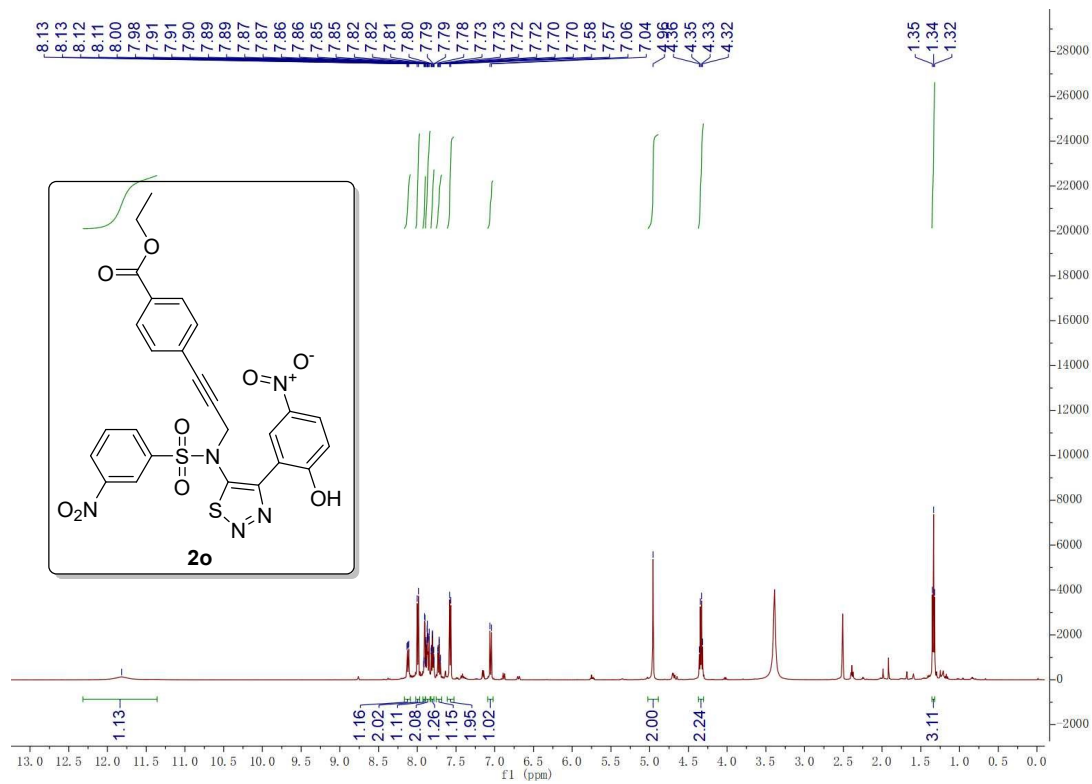

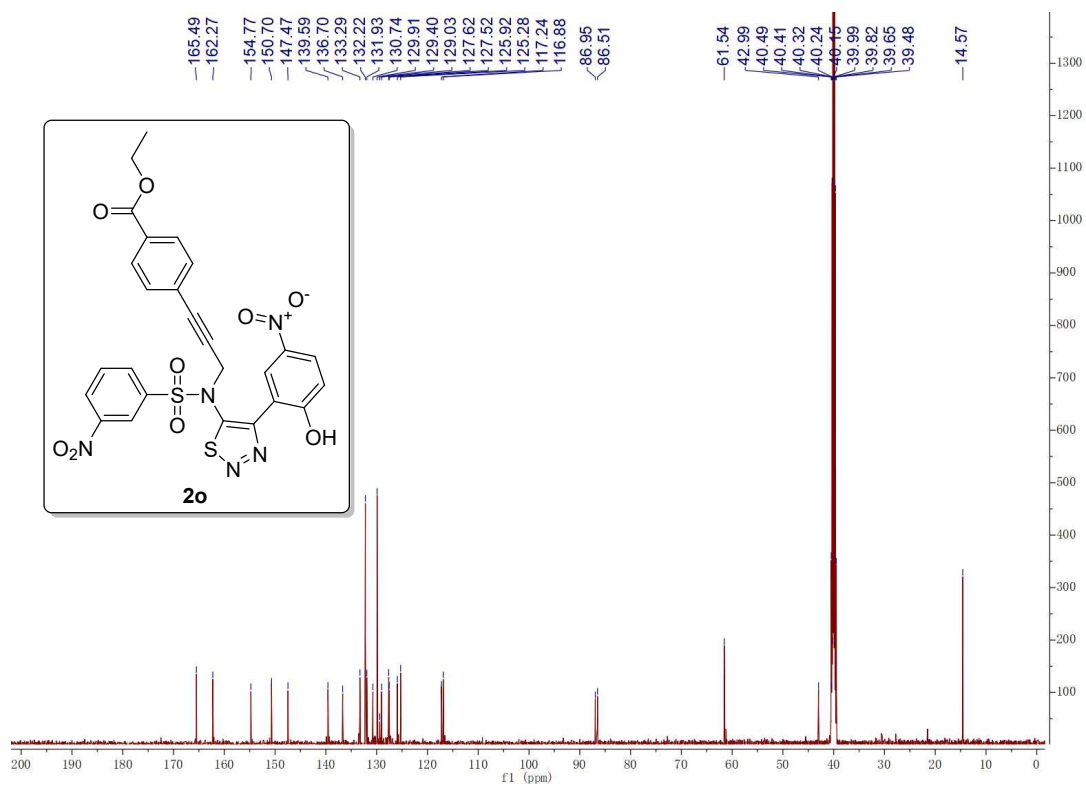

Supplement: d2qo00351a1.pdf [file d2qo00351a1.pdf]
